# Supplementary material for: The targeted development of collagen-active peptides based on composite enzyme hydrolysis: a study on the structure–activity relationship
Source: Royal Society of Chemistry journal article supplement (doi:10.1039/d3fo04455f), 2023-12-01
Supplement: d3fo04455f1.xlsx [file d3fo04455f1.xlsx]

## Sheet: Figure1
时间	AP	AP'	AP''	APN	APN'	APN''	APG	APG'	APG''		细胞色素	牛胰岛素	杆菌肽	谷胱甘肽	甘氨酸
0	-4.19855e-05	-2.01106e-05	-1.86563e-06	2.13742e-05	3.7837e-05	-4.07815e-05	0.00012567	0.000137758	0.000134468	分子量/Da	12384	5733.49	1421.69	307.32	75.07
0.0166667	-0.000103366	-4.98116e-05	-4.99487e-06	5.25653e-05	9.27806e-05	-0.000100201	0.000305665	0.000335395	0.000327253	取log10	4.09286	3.75842	3.1528	2.48759	1.87547
0.0333333	-9.97186e-05	-5.02646e-05	-1.08123e-05	4.9609e-05	8.60334e-05	-9.57906e-05	0.000274265	0.000303137	0.000295878	保留时间	5.55	6.562	7.438	9.512	10.075
0.05	-9.52601e-05	-5.32448e-05	-2.46406e-05	4.29332e-05	7.12037e-05	-8.87573e-05	0.000209701	0.000236785	0.000231218
0.0666667	-9.45211e-05	-6.24955e-05	-4.83394e-05	3.19421e-05	4.81725e-05	-8.27014e-05	0.000116718	0.00014075	0.000138068
0.0833333	-0.000103152	-8.29995e-05	-8.24332e-05	1.44661e-05	1.6582e-05	-8.3822e-05	1.20044e-05	3.05772e-05	3.18527e-05
0.1	-0.000129068	-0.000122219	-0.000128782	-1.22607e-05	-2.40207e-05	-0.000100845	-8.61764e-05	-7.56621e-05	-7.02381e-05
0.116667	-0.000179112	-0.000186115	-0.000191391	-5.11467e-05	-7.40409e-05	-0.000141639	-0.000170863	-0.000169623	-0.000160575
0.133333	-0.000255215	-0.000275046	-0.000272477	-9.87589e-05	-0.000130165	-0.000207895	-0.000246561	-0.000254309	-0.000242448
0.15	-0.000354087	-0.000383049	-0.000370181	-0.000145704	-0.000184309	-0.000295848	-0.000318444	-0.000333774	-0.000319314
0.166667	-0.000466764	-0.000499874	-0.000476682	-0.000182897	-0.000229704	-0.000396818	-0.00038842	-0.000409687	-0.000392699
0.183333	-0.0005844	-0.000618225	-0.000584066	-0.000207597	-0.000264418	-0.000503463	-0.000453293	-0.000479138	-0.000459599
0.2	-0.000701654	-0.000736099	-0.00068866	-0.000225836	-0.000293362	-0.000611728	-0.000513518	-0.000543535	-0.000521398
0.216667	-0.000817978	-0.000854856	-0.000791442	-0.000245076	-0.000321949	-0.000721496	-0.00057081	-0.000604403	-0.000579762
0.233333	-0.000934541	-0.000975353	-0.000894129	-0.000268561	-0.000352156	-0.000833124	-0.000627077	-0.000663817	-0.000636554
0.25	-0.00105132	-0.00109585	-0.000996888	-0.000293642	-0.000381649	-0.000945944	-0.000682008	-0.000721204	-0.000691366
0.266667	-0.00116705	-0.00121427	-0.00109857	-0.000317198	-0.000408685	-0.00105853	-0.000735938	-0.000777018	-0.000744486
0.283333	-0.0012798	-0.00132888	-0.00119752	-0.000338298	-0.000433266	-0.00116965	-0.000788796	-0.000831616	-0.000796008
0.3	-0.00138832	-0.00143903	-0.00129238	-0.000357491	-0.000456393	-0.00127789	-0.00084008	-0.000884879	-0.000845575
0.316667	-0.00149153	-0.00154424	-0.00138227	-0.000375467	-0.000478589	-0.00138285	-0.000889003	-0.000936472	-0.000892949
0.333333	-0.00158912	-0.00164431	-0.00146705	-0.000392657	-0.000499833	-0.00148374	-0.000935328	-0.000985753	-0.000938106
0.35	-0.00168084	-0.00173886	-0.00154651	-0.000409323	-0.000520074	-0.00158037	-0.000979269	-0.00103256	-0.000981545
0.366667	-0.00176681	-0.00182722	-0.00162069	-0.000425845	-0.000539505	-0.00167174	-0.00102125	-0.00107721	-0.00102348
0.383333	-0.00184706	-0.00190919	-0.00168966	-0.000442559	-0.000558436	-0.00175766	-0.0010614	-0.00112024	-0.0010638
0.4	-0.00192179	-0.00198463	-0.00175356	-0.000459868	-0.000577271	-0.00183772	-0.00109984	-0.00116187	-0.00110202
0.416667	-0.00199117	-0.00205422	-0.00181264	-0.000478178	-0.000596345	-0.00191223	-0.00113684	-0.00120193	-0.00113831
0.433333	-0.00205537	-0.00211847	-0.00186738	-0.000497609	-0.000615299	-0.00198168	-0.00117279	-0.00124022	-0.001173
0.45	-0.00211462	-0.00217808	-0.00191816	-0.000517994	-0.000633991	-0.00204613	-0.00120784	-0.00127679	-0.00120676
0.466667	-0.0021696	-0.00223327	-0.00196539	-0.000538522	-0.000652349	-0.00210571	-0.00124217	-0.00131201	-0.00124004
0.483333	-0.00222102	-0.00228439	-0.0020094	-0.000558573	-0.000670588	-0.00216093	-0.00127541	-0.00134622	-0.00127282
0.5	-0.00226949	-0.00233136	-0.00205055	-0.000577527	-0.000688541	-0.00221211	-0.00130736	-0.00137924	-0.00130522
0.516667	-0.00231541	-0.0023747	-0.00208934	-0.000595266	-0.000705922	-0.00225994	-0.00133804	-0.00141116	-0.001337
0.533333	-0.00235881	-0.00241495	-0.00212628	-0.000611883	-0.000722492	-0.00230472	-0.00136801	-0.00144156	-0.00136795
0.55	-0.00239974	-0.00245269	-0.00216159	-0.000627285	-0.000737846	-0.0023466	-0.00139743	-0.0014707	-0.00139816
0.566667	-0.00243844	-0.00248852	-0.00219542	-0.000641376	-0.000752103	-0.00238554	-0.00142597	-0.00149893	-0.00142779
0.583333	-0.00247523	-0.00252283	-0.00222782	-0.000653511	-0.000765192	-0.0024218	-0.00145313	-0.00152644	-0.00145736
0.6	-0.00251051	-0.00255557	-0.00225877	-0.000663334	-0.000777376	-0.00245602	-0.00147902	-0.00155343	-0.00148678
0.616667	-0.00254453	-0.00258663	-0.00228857	-0.000670677	-0.000788271	-0.00248884	-0.00150422	-0.00158006	-0.00151584
0.633333	-0.00257741	-0.00261598	-0.00231742	-0.000676018	-0.000798166	-0.00252091	-0.00152904	-0.00160598	-0.00154409
0.65	-0.00260936	-0.00264397	-0.00234553	-0.000679928	-0.000806844	-0.002552	-0.00155345	-0.00163103	-0.00157142
0.666667	-0.00264078	-0.00267146	-0.00237287	-0.000682956	-0.000814331	-0.00258185	-0.00157718	-0.00165504	-0.00159807
0.683333	-0.00267175	-0.002699	-0.00239931	-0.000685221	-0.000820673	-0.00261015	-0.00160004	-0.00167831	-0.00162423
0.7	-0.0027023	-0.00272704	-0.0024249	-0.000686651	-0.000825775	-0.00263693	-0.0016224	-0.0017013	-0.00165014
0.716667	-0.00273198	-0.00275555	-0.00244957	-0.000687033	-0.000829899	-0.00266272	-0.00164472	-0.0017244	-0.00167549
0.733333	-0.0027608	-0.00278428	-0.0024737	-0.000686794	-0.000833332	-0.00268771	-0.00166689	-0.00174736	-0.00170028
0.75	-0.00278865	-0.00281289	-0.00249745	-0.000685507	-0.000836456	-0.00271234	-0.00168875	-0.00176987	-0.00172486
0.766667	-0.00281602	-0.00284131	-0.00252093	-0.000683552	-0.00083946	-0.00273632	-0.00171017	-0.00179149	-0.00175006
0.783333	-0.00284346	-0.00286942	-0.00254411	-0.000680953	-0.000842035	-0.00275995	-0.00173131	-0.0018124	-0.00177648
0.8	-0.00287121	-0.00289729	-0.00256711	-0.000678164	-0.000844133	-0.00278344	-0.00175253	-0.00183281	-0.00180433
0.816667	-0.00289904	-0.00292459	-0.00259	-0.00067516	-0.000845683	-0.00280723	-0.00177385	-0.00185329	-0.00183325
0.833333	-0.00292686	-0.00295127	-0.00261303	-0.000672561	-0.000847065	-0.00283129	-0.00179502	-0.00187427	-0.00186245
0.85	-0.00295459	-0.00297743	-0.00263583	-0.000670439	-0.000848663	-0.00285491	-0.00181578	-0.00189592	-0.0018913
0.866667	-0.00298208	-0.00300325	-0.00265838	-0.000668937	-0.000850618	-0.00287809	-0.00183617	-0.00191809	-0.00191917
0.883333	-0.00300909	-0.00302885	-0.00268019	-0.000668174	-0.000852883	-0.00290067	-0.001856	-0.00193998	-0.00194578
0.9	-0.00303532	-0.00305403	-0.00270113	-0.000667268	-0.000855315	-0.00292291	-0.00187579	-0.00196108	-0.00197079
0.916667	-0.00306057	-0.00307851	-0.00272132	-0.000665623	-0.000857914	-0.00294494	-0.00189577	-0.00198134	-0.00199416
0.933333	-0.00308503	-0.00310217	-0.00274104	-0.000663	-0.000860632	-0.00296661	-0.00191594	-0.00200106	-0.00201643
0.95	-0.00310904	-0.00312534	-0.00276033	-0.000660664	-0.000863326	-0.00298786	-0.00193607	-0.00202102	-0.00203843
0.966667	-0.00313283	-0.0031482	-0.00277952	-0.000659949	-0.000865734	-0.00300877	-0.0019565	-0.00204111	-0.00206072
0.983333	-0.00315656	-0.00317081	-0.00279859	-0.000661403	-0.000867975	-0.00302948	-0.00197705	-0.00206176	-0.00208333
1	-0.00317992	-0.00319281	-0.00281752	-0.000664049	-0.000870264	-0.00305008	-0.00199777	-0.00208245	-0.00210595
1.01667	-0.00320293	-0.0032142	-0.00283622	-0.000666505	-0.000873053	-0.00307044	-0.00201844	-0.00210327	-0.00212836
1.03333	-0.00322534	-0.0032353	-0.00285462	-0.000668126	-0.000876319	-0.00309033	-0.00203914	-0.00212413	-0.00215075
1.05	-0.00324718	-0.00325618	-0.00287262	-0.000669485	-0.000879753	-0.00310985	-0.00206002	-0.00214495	-0.00217342
1.06667	-0.00326844	-0.00327683	-0.00289034	-0.00067113	-0.000883138	-0.00312914	-0.0020815	-0.0021659	-0.00219679
1.08333	-0.00328924	-0.00329667	-0.00290779	-0.000673109	-0.000886452	-0.00314836	-0.00210353	-0.00218707	-0.00222097
1.1	-0.00330945	-0.00331548	-0.00292503	-0.000675279	-0.000889623	-0.00316724	-0.0021258	-0.00220891	-0.00224631
1.11667	-0.00332922	-0.00333353	-0.00294215	-0.00067752	-0.000892913	-0.00318562	-0.00214788	-0.00223137	-0.00227246
1.13333	-0.0033487	-0.0033515	-0.00295903	-0.000679737	-0.000896132	-0.00320365	-0.00216969	-0.00225431	-0.0022995
1.15	-0.00336815	-0.00336981	-0.00297557	-0.000682002	-0.000899518	-0.00322129	-0.00219155	-0.00227734	-0.00232668
1.16667	-0.00338765	-0.00338874	-0.00299147	-0.000684315	-0.000903165	-0.00323896	-0.00221366	-0.00229982	-0.00235314
1.18333	-0.00340706	-0.0034082	-0.00300692	-0.000686675	-0.000907242	-0.00325651	-0.00223566	-0.00232176	-0.00237825
1.2	-0.00342604	-0.0034277	-0.00302228	-0.000689012	-0.000911725	-0.00327391	-0.00225793	-0.00234343	-0.00240207
1.21667	-0.00344461	-0.0034467	-0.00303811	-0.000691372	-0.000916469	-0.00329103	-0.0022806	-0.00236517	-0.00242479
1.23333	-0.00346278	-0.0034649	-0.00305451	-0.000693589	-0.000921404	-0.00330784	-0.0023039	-0.00238696	-0.00244758
1.25	-0.00348049	-0.00348254	-0.00307115	-0.000695831	-0.000926626	-0.00332431	-0.0023275	-0.0024089	-0.00247107
1.26667	-0.00349799	-0.00349994	-0.00308732	-0.000698405	-0.000932014	-0.00334076	-0.00235134	-0.00243119	-0.00249562
1.28333	-0.00351528	-0.0035173	-0.00310291	-0.0007016	-0.000937426	-0.00335712	-0.00237519	-0.00245393	-0.00252125
1.3	-0.00353271	-0.00353466	-0.00311805	-0.000705344	-0.000942862	-0.00337357	-0.002399	-0.00247732	-0.00254788
1.31667	-0.00355021	-0.0035518	-0.00313305	-0.000709325	-0.000948226	-0.00338983	-0.00242306	-0.00250093	-0.00257537
1.33333	-0.00356771	-0.00356844	-0.00314814	-0.000713211	-0.000953877	-0.00340571	-0.00244755	-0.00252448	-0.00260339
1.35	-0.00358471	-0.00358444	-0.00316275	-0.000716764	-0.000959575	-0.00342099	-0.00247203	-0.00254792	-0.002632
1.36667	-0.00360113	-0.00359965	-0.00317677	-0.000720102	-0.000965536	-0.00343573	-0.00249647	-0.00257138	-0.00266073
1.38333	-0.00361713	-0.00361422	-0.00319029	-0.000723439	-0.000971139	-0.00345005	-0.00252091	-0.00259515	-0.00268936
1.4	-0.00363282	-0.0036285	-0.00320345	-0.000727135	-0.00097636	-0.00346433	-0.00254515	-0.00261964	-0.00271718
1.41667	-0.00364832	-0.00364307	-0.00321628	-0.000731188	-0.000981486	-0.00347852	-0.0025694	-0.00264465	-0.00274384
1.43333	-0.00366365	-0.00365813	-0.00322868	-0.000735766	-0.000986946	-0.00349233	-0.00259389	-0.0026703	-0.00276918
1.45	-0.00367864	-0.00367356	-0.00324098	-0.000740725	-0.000992835	-0.00350558	-0.00261873	-0.00269607	-0.0027935
1.46667	-0.00369338	-0.00368879	-0.00325273	-0.000745493	-0.00099901	-0.00351839	-0.00264388	-0.00272173	-0.00281816
1.48333	-0.00370794	-0.00370336	-0.00326456	-0.000749904	-0.00100499	-0.00353088	-0.00266937	-0.00274714	-0.00284405
1.5	-0.00372201	-0.00371686	-0.00327612	-0.000753933	-0.001011	-0.00354287	-0.00269471	-0.0027722	-0.00287123
1.51667	-0.00373589	-0.00372954	-0.00328735	-0.000758105	-0.00101699	-0.00355472	-0.00271956	-0.00279688	-0.00289938
1.53333	-0.00374945	-0.00374153	-0.00329808	-0.000762755	-0.00102283	-0.00356645	-0.00274423	-0.00282129	-0.00292754
1.55	-0.00376297	-0.00375338	-0.0033085	-0.000767785	-0.00102884	-0.0035782	-0.00276915	-0.00284566	-0.00295572
1.56667	-0.00377611	-0.00376504	-0.0033187	-0.000773031	-0.00103461	-0.00359008	-0.00279471	-0.00287017	-0.00298419
1.58333	-0.00378879	-0.00377663	-0.00332884	-0.000777894	-0.00103999	-0.00360193	-0.0028205	-0.00289468	-0.00301364
1.6	-0.0038009	-0.00378812	-0.00333878	-0.000782329	-0.00104498	-0.00361356	-0.00284604	-0.0029194	-0.00304396
1.61667	-0.00381285	-0.00379921	-0.00334822	-0.000786716	-0.00104984	-0.0036246	-0.00287069	-0.0029442	-0.00307474
1.63333	-0.00382465	-0.00380967	-0.00335709	-0.000791127	-0.00105501	-0.00363519	-0.00289518	-0.0029692	-0.00310528
1.65	-0.00383657	-0.0038193	-0.00336553	-0.000795513	-0.00106062	-0.00364534	-0.00292023	-0.00299431	-0.00313494
1.66667	-0.00384823	-0.00382832	-0.00337378	-0.000799781	-0.00106663	-0.00365526	-0.00294586	-0.00301942	-0.00316362
1.68333	-0.00385946	-0.00383719	-0.00338191	-0.000804001	-0.00107249	-0.00366475	-0.00297192	-0.00304474	-0.00319133
1.7	-0.00387005	-0.0038461	-0.0033897	-0.000808412	-0.00107788	-0.00367379	-0.00299774	-0.00307025	-0.00321841
1.71667	-0.00388006	-0.00385507	-0.00339698	-0.00081299	-0.00108265	-0.00368237	-0.00302318	-0.003096	-0.00324519
1.73333	-0.00388981	-0.00386391	-0.00340403	-0.000817591	-0.00108708	-0.00369045	-0.00304836	-0.00312163	-0.00327206
1.75	-0.00389932	-0.00387245	-0.00341119	-0.000821906	-0.00109132	-0.00369827	-0.00307327	-0.00314721	-0.003299
1.76667	-0.0039086	-0.00388089	-0.0034186	-0.000825936	-0.00109545	-0.00370571	-0.00309819	-0.00317208	-0.00332575
1.78333	-0.00391759	-0.00388897	-0.00342635	-0.00082975	-0.00109967	-0.00371291	-0.00312332	-0.00319663	-0.00335162
1.8	-0.00392622	-0.00389667	-0.00343431	-0.000833899	-0.00110396	-0.00372004	-0.00314845	-0.0032205	-0.00337651
1.81667	-0.00393471	-0.00390385	-0.00344218	-0.000837857	-0.0011083	-0.00372726	-0.00317351	-0.00324408	-0.00340052
1.83333	-0.00394298	-0.00391071	-0.00344974	-0.000841552	-0.00111271	-0.00373468	-0.00319828	-0.00326756	-0.00342391
1.85	-0.00395106	-0.00391761	-0.00345679	-0.000844842	-0.00111719	-0.00374245	-0.00322267	-0.00329131	-0.00344694
1.86667	-0.00395891	-0.00392461	-0.0034635	-0.000848061	-0.00112196	-0.00375039	-0.00324651	-0.00331546	-0.00346973
1.88333	-0.00396644	-0.00393153	-0.00347017	-0.000851446	-0.00112714	-0.00375845	-0.00326973	-0.00333959	-0.00349202
1.9	-0.00397388	-0.00393804	-0.00347716	-0.00085519	-0.00113248	-0.00376641	-0.00329243	-0.00336329	-0.00351376
1.91667	-0.00398141	-0.00394405	-0.00348431	-0.000859076	-0.00113755	-0.00377397	-0.00331477	-0.00338594	-0.00353494
1.93333	-0.00398906	-0.00395012	-0.00349139	-0.000862795	-0.0011418	-0.00378117	-0.00333687	-0.00340756	-0.00355568
1.95	-0.00399681	-0.00395656	-0.00349819	-0.000866419	-0.00114547	-0.0037882	-0.00335869	-0.00342847	-0.00357633
1.96667	-0.00400468	-0.00396355	-0.00350496	-0.000869948	-0.00114897	-0.00379545	-0.00338014	-0.00344933	-0.00359707
1.98333	-0.00401253	-0.0039707	-0.00351177	-0.000873429	-0.001153	-0.00380296	-0.00340115	-0.00347055	-0.0036181
2	-0.00402032	-0.00397773	-0.00351864	-0.00087679	-0.00115737	-0.00381042	-0.00342184	-0.00349187	-0.00363927
2.01667	-0.00402802	-0.00398465	-0.00352529	-0.00088008	-0.00116166	-0.00381748	-0.00344235	-0.00351294	-0.00366035
2.03333	-0.00403575	-0.00399151	-0.00353133	-0.000883371	-0.00116555	-0.00382389	-0.00346268	-0.0035334	-0.00368111
2.05	-0.0040435	-0.00399826	-0.00353702	-0.000886518	-0.00116926	-0.00383016	-0.00348293	-0.00355309	-0.00370109
2.06667	-0.00405146	-0.00400451	-0.00354265	-0.000889546	-0.00117322	-0.00383636	-0.00350271	-0.00357214	-0.00372012
2.08333	-0.0040594	-0.00401011	-0.0035489	-0.000892311	-0.00117778	-0.00384304	-0.00352215	-0.00359093	-0.00373802
2.1	-0.00406705	-0.00401538	-0.00355555	-0.000895101	-0.00118288	-0.00385019	-0.00354127	-0.00360931	-0.00375497
2.11667	-0.00407449	-0.00402084	-0.00356251	-0.0008982	-0.00118815	-0.00385768	-0.00355994	-0.00362698	-0.00377114
2.13333	-0.0040815	-0.0040268	-0.00356945	-0.000901681	-0.00119339	-0.00386536	-0.00357808	-0.00364419	-0.00378735
2.15	-0.00408853	-0.00403338	-0.00357615	-0.000905305	-0.00119833	-0.00387294	-0.00359584	-0.0036611	-0.00380385
2.16667	-0.00409583	-0.0040403	-0.00358275	-0.000908762	-0.00120293	-0.00388023	-0.00361296	-0.00367776	-0.00382075
2.18333	-0.00410358	-0.00404721	-0.00358936	-0.000911814	-0.00120743	-0.00388724	-0.00362965	-0.00369421	-0.00383787
2.2	-0.0041114	-0.00405393	-0.00359598	-0.000914604	-0.00121187	-0.00389408	-0.00364639	-0.0037104	-0.00385451
2.21667	-0.00411888	-0.00406047	-0.0036028	-0.000917274	-0.00121638	-0.00390114	-0.00366327	-0.00372638	-0.00387075
2.23333	-0.00412592	-0.00406681	-0.00360964	-0.000919873	-0.00122095	-0.00390837	-0.00368017	-0.00374209	-0.00388658
2.25	-0.00413283	-0.0040731	-0.00361625	-0.000922495	-0.00122577	-0.00391552	-0.00369657	-0.00375761	-0.00390244
2.26667	-0.00413986	-0.0040794	-0.00362238	-0.000925332	-0.0012308	-0.00392243	-0.00371202	-0.00377308	-0.00391789
2.28333	-0.00414702	-0.00408559	-0.00362791	-0.000928312	-0.00123583	-0.00392908	-0.00372673	-0.00378853	-0.00393255
2.3	-0.00415407	-0.00409177	-0.00363337	-0.000931603	-0.00124046	-0.00393586	-0.00374128	-0.00380384	-0.00394664
2.31667	-0.00416084	-0.00409787	-0.00363921	-0.000935107	-0.00124437	-0.00394303	-0.00375611	-0.00381845	-0.00396082
2.33333	-0.00416731	-0.00410379	-0.00364586	-0.000939017	-0.00124747	-0.00395047	-0.00377117	-0.00383211	-0.00397592
2.35	-0.00417367	-0.00410941	-0.00365299	-0.000943142	-0.00125026	-0.00395798	-0.00378591	-0.00384518	-0.0039922
2.36667	-0.00417987	-0.00411461	-0.00366007	-0.000947291	-0.00125307	-0.00396535	-0.00379978	-0.00385786	-0.00400934
2.38333	-0.00418571	-0.0041194	-0.00366644	-0.000950915	-0.00125643	-0.00397252	-0.00381268	-0.00387081	-0.00402684
2.4	-0.00419136	-0.00412372	-0.00367225	-0.000954253	-0.00126029	-0.00397965	-0.00382515	-0.00388411	-0.00404444
2.41667	-0.00419689	-0.00412779	-0.00367771	-0.00095759	-0.0012643	-0.00398654	-0.00383745	-0.00389746	-0.00406206
2.43333	-0.00420286	-0.00413182	-0.00368315	-0.000961167	-0.00126847	-0.00399331	-0.0038499	-0.00391055	-0.00407946
2.45	-0.00420922	-0.00413581	-0.00368856	-0.000965172	-0.00127267	-0.00399999	-0.00386232	-0.00392295	-0.00409646
2.46667	-0.00421571	-0.00413998	-0.00369417	-0.000969511	-0.00127681	-0.00400702	-0.00387467	-0.0039343	-0.00411315
2.48333	-0.00422159	-0.00414398	-0.00369994	-0.000974089	-0.00128082	-0.00401449	-0.00388695	-0.00394493	-0.00412967
2.5	-0.00422653	-0.00414777	-0.00370616	-0.000978595	-0.00128466	-0.00402245	-0.00389921	-0.00395535	-0.00414641
2.51667	-0.00423084	-0.00415123	-0.00371271	-0.000982672	-0.00128838	-0.00403063	-0.00391098	-0.0039663	-0.00416336
2.53333	-0.00423497	-0.00415426	-0.00371987	-0.000986129	-0.00129212	-0.00403869	-0.00392214	-0.003978	-0.00418031
2.55	-0.00423933	-0.00415705	-0.00372766	-0.000988919	-0.00129591	-0.0040462	-0.00393277	-0.00398971	-0.00419684
2.56667	-0.00424384	-0.00415965	-0.00373601	-0.000991732	-0.00129977	-0.00405328	-0.00394331	-0.00400106	-0.00421195
2.58333	-0.00424832	-0.00416227	-0.00374457	-0.000995189	-0.00130326	-0.0040604	-0.00395395	-0.00401124	-0.00422545
2.6	-0.00425245	-0.00416482	-0.00375284	-0.000999218	-0.00130647	-0.00406835	-0.00396477	-0.00402058	-0.00423672
2.61667	-0.00425636	-0.00416721	-0.00376049	-0.00100337	-0.00130962	-0.00407731	-0.00397538	-0.00402974	-0.00424614
2.63333	-0.00425986	-0.00416923	-0.00376765	-0.00100706	-0.00131301	-0.00408727	-0.00398542	-0.00403911	-0.00425429
2.65	-0.00426318	-0.0041709	-0.00377492	-0.00100992	-0.00131675	-0.00409777	-0.00399503	-0.00404877	-0.00426183
2.66667	-0.00426646	-0.00417226	-0.00378274	-0.00101202	-0.00132049	-0.00410833	-0.00400449	-0.00405809	-0.00426977
2.68333	-0.00426976	-0.00417343	-0.0037908	-0.00101388	-0.00132414	-0.00411856	-0.00401384	-0.0040672	-0.00427873
2.7	-0.00427309	-0.00417448	-0.00379902	-0.00101564	-0.00132745	-0.00412843	-0.00402304	-0.00407611	-0.00428925
2.71667	-0.00427648	-0.00417562	-0.00380722	-0.00101793	-0.00133036	-0.00413784	-0.00403184	-0.00408534	-0.00430138
2.73333	-0.00427977	-0.00417722	-0.0038154	-0.00102084	-0.00133313	-0.00414736	-0.0040403	-0.00409495	-0.0043148
2.75	-0.00428291	-0.00417963	-0.00382344	-0.00102435	-0.00133601	-0.00415689	-0.00404879	-0.00410463	-0.00432923
2.76667	-0.00428592	-0.00418292	-0.00383123	-0.00102814	-0.00133928	-0.0041665	-0.00405754	-0.00411402	-0.00434403
2.78333	-0.00428885	-0.00418683	-0.00383874	-0.00103179	-0.00134281	-0.00417585	-0.00406638	-0.0041222	-0.00435874
2.8	-0.00429179	-0.00419078	-0.00384611	-0.00103491	-0.00134648	-0.00418474	-0.0040747	-0.00412835	-0.00437269
2.81667	-0.00429498	-0.00419479	-0.00385319	-0.0010377	-0.00134991	-0.00419332	-0.00408214	-0.00413207	-0.00438578
2.83333	-0.00429839	-0.00419892	-0.00386018	-0.0010403	-0.00135318	-0.00420186	-0.00408901	-0.00413419	-0.0043977
2.85	-0.00430187	-0.0042033	-0.00386695	-0.00104306	-0.00135649	-0.0042102	-0.0040959	-0.00413619	-0.00440903
2.86667	-0.00430526	-0.004208	-0.00387372	-0.00104602	-0.00136002	-0.00421805	-0.00410312	-0.00413955	-0.00441983
2.88333	-0.00430874	-0.00421298	-0.00388035	-0.00104914	-0.00136372	-0.00422513	-0.00411054	-0.00414475	-0.00442991
2.9	-0.00431231	-0.00421825	-0.00388659	-0.00105217	-0.00136737	-0.00423133	-0.00411786	-0.00415081	-0.00443876
2.91667	-0.00431608	-0.00422378	-0.00389205	-0.00105498	-0.00137087	-0.00423703	-0.00412477	-0.00415713	-0.0044461
2.93333	-0.00431989	-0.00422943	-0.00389661	-0.00105784	-0.00137416	-0.00424225	-0.00413142	-0.00416309	-0.00445154
2.95	-0.00432378	-0.0042353	-0.00390071	-0.00106097	-0.00137729	-0.00424735	-0.00413798	-0.00416941	-0.0044553
2.96667	-0.00432767	-0.00424126	-0.00390481	-0.00106435	-0.00138022	-0.00425243	-0.00414475	-0.00417603	-0.00445795
2.98333	-0.0043317	-0.0042476	-0.00390903	-0.00106774	-0.00138291	-0.00425746	-0.00415145	-0.00418297	-0.00446005
3	-0.00433565	-0.00425449	-0.00391332	-0.00107062	-0.00138563	-0.00426242	-0.00415834	-0.0041896	-0.00446212
3.01667	-0.00433966	-0.00426157	-0.00391723	-0.00107303	-0.00138863	-0.00426697	-0.00416528	-0.0041957	-0.00446436
3.03333	-0.00434369	-0.00426858	-0.00392064	-0.00107508	-0.00139209	-0.00427114	-0.00417236	-0.0042013	-0.00446684
3.05	-0.00434784	-0.00427526	-0.0039236	-0.00107737	-0.00139562	-0.00427474	-0.00417942	-0.00420691	-0.00446923
3.06667	-0.00435237	-0.00428153	-0.00392653	-0.00107997	-0.00139862	-0.00427799	-0.00418655	-0.00421275	-0.00447154
3.08333	-0.0043574	-0.00428744	-0.0039297	-0.00108307	-0.00140072	-0.00428099	-0.00419382	-0.00421911	-0.00447393
3.1	-0.00436298	-0.00429307	-0.0039333	-0.0010866	-0.00140234	-0.00428383	-0.00420097	-0.00422569	-0.00447631
3.11667	-0.00436872	-0.00429874	-0.00393719	-0.00109056	-0.00140425	-0.00428678	-0.00420736	-0.00423239	-0.00447877
3.13333	-0.00437456	-0.00430472	-0.00394093	-0.0010943	-0.00140685	-0.00428995	-0.0042127	-0.00423888	-0.00448081
3.15	-0.00438048	-0.00431133	-0.00394419	-0.00109771	-0.00141	-0.00429363	-0.00421699	-0.00424482	-0.00448229
3.16667	-0.00438648	-0.00431834	-0.00394713	-0.0011005	-0.00141321	-0.00429763	-0.00422059	-0.00425004	-0.0044831
3.18333	-0.00439259	-0.00432537	-0.00395013	-0.001103	-0.00141593	-0.00430178	-0.00422412	-0.00425461	-0.00448334
3.2	-0.00439876	-0.00433217	-0.00395333	-0.00110608	-0.00141839	-0.00430567	-0.00422822	-0.00425903	-0.00448387
3.21667	-0.0044047	-0.00433858	-0.00395674	-0.00111006	-0.00142094	-0.00430896	-0.00423335	-0.0042636	-0.00448492
3.23333	-0.00441047	-0.00434473	-0.00395998	-0.00111459	-0.00142392	-0.00431177	-0.00423962	-0.00426847	-0.00448663
3.25	-0.00441598	-0.00435079	-0.0039631	-0.00111886	-0.00142745	-0.00431434	-0.00424613	-0.00427347	-0.00448916
3.26667	-0.00442132	-0.00435651	-0.00396625	-0.0011221	-0.00143133	-0.00431699	-0.00425228	-0.00427867	-0.00449254
3.28333	-0.00442642	-0.00436194	-0.00396968	-0.0011246	-0.00143517	-0.00432009	-0.00425731	-0.00428384	-0.00449696
3.3	-0.0044315	-0.00436712	-0.00397342	-0.00112713	-0.00143877	-0.00432355	-0.00426167	-0.00428892	-0.00450296
3.31667	-0.00443672	-0.00437239	-0.0039771	-0.00113023	-0.00144199	-0.0043272	-0.00426618	-0.00429353	-0.00451045
3.33333	-0.00444242	-0.00437787	-0.00398053	-0.00113395	-0.0014448	-0.00433089	-0.00427114	-0.0042976	-0.00451927
3.35	-0.00444847	-0.00438357	-0.00398382	-0.0011381	-0.00144743	-0.00433454	-0.0042765	-0.00430175	-0.00452847
3.36667	-0.00445489	-0.00438934	-0.00398725	-0.00114234	-0.0014501	-0.00433795	-0.00428165	-0.00430626	-0.00453715
3.38333	-0.00446113	-0.00439492	-0.0039909	-0.00114661	-0.00145303	-0.00434095	-0.0042864	-0.00431129	-0.00454464
3.4	-0.00446726	-0.0044004	-0.00399479	-0.00115071	-0.0014562	-0.00434388	-0.00429088	-0.00431651	-0.00455053
3.41667	-0.00447336	-0.00440555	-0.00399867	-0.00115476	-0.00145959	-0.00434694	-0.00429517	-0.00432128	-0.00455532
3.43333	-0.0044794	-0.00441061	-0.00400223	-0.00115848	-0.00146302	-0.00435044	-0.00429984	-0.00432531	-0.00455956
3.45	-0.00448555	-0.00441561	-0.00400516	-0.00116218	-0.00146662	-0.00435407	-0.00430509	-0.00432891	-0.00456371
3.46667	-0.00449141	-0.00442067	-0.00400752	-0.00116597	-0.00147051	-0.00435745	-0.00431074	-0.0043326	-0.00456765
3.48333	-0.00449678	-0.00442579	-0.00400976	-0.00116997	-0.00147477	-0.00436057	-0.00431639	-0.00433668	-0.00457098
3.5	-0.00450147	-0.00443092	-0.00401226	-0.00117422	-0.0014793	-0.00436358	-0.00432156	-0.00434104	-0.00457366
3.51667	-0.00450589	-0.00443612	-0.00401512	-0.00117844	-0.00148393	-0.00436716	-0.00432614	-0.00434543	-0.00457583
3.53333	-0.00451025	-0.00444141	-0.00401817	-0.00118254	-0.00148829	-0.00437142	-0.00433015	-0.0043496	-0.00457766
3.55	-0.00451495	-0.00444678	-0.0040213	-0.00118657	-0.00149223	-0.00437624	-0.00433375	-0.00435363	-0.00457962
3.56667	-0.0045199	-0.00445197	-0.00402449	-0.00119048	-0.00149604	-0.00438124	-0.00433701	-0.00435775	-0.00458171
3.58333	-0.0045251	-0.00445693	-0.00402807	-0.0011941	-0.00150002	-0.00438601	-0.00434004	-0.00436176	-0.00458422
3.6	-0.00453039	-0.0044616	-0.00403191	-0.00119765	-0.00150443	-0.00439064	-0.00434323	-0.00436581	-0.00458729
3.61667	-0.00453581	-0.00446611	-0.00403572	-0.00120114	-0.00150896	-0.00439512	-0.00434681	-0.0043698	-0.00459099
3.63333	-0.00454122	-0.00447059	-0.0040393	-0.00120476	-0.00151333	-0.00439967	-0.0043507	-0.00437397	-0.00459492
3.65	-0.00454675	-0.00447524	-0.00404249	-0.0012086	-0.00151735	-0.0044044	-0.00435442	-0.00437838	-0.00459862
3.66667	-0.00455228	-0.00447996	-0.00404586	-0.00121294	-0.00152129	-0.00440888	-0.00435771	-0.00438284	-0.00460184
3.68333	-0.0045576	-0.00448468	-0.00404955	-0.00121759	-0.00152541	-0.00441312	-0.00436064	-0.00438689	-0.00460475
3.7	-0.00456234	-0.00448924	-0.00405382	-0.00122195	-0.0015298	-0.00441708	-0.00436364	-0.0043904	-0.00460773
3.71667	-0.00456656	-0.00449358	-0.00405811	-0.00122567	-0.00153447	-0.00442101	-0.0043671	-0.00439335	-0.00461133
3.73333	-0.00457059	-0.00449784	-0.00406195	-0.00122839	-0.00153919	-0.00442485	-0.00437099	-0.00439605	-0.00461557
3.75	-0.00457484	-0.00450216	-0.00406548	-0.0012307	-0.00154396	-0.00442883	-0.00437516	-0.00439869	-0.00462055
3.76667	-0.00457951	-0.00450676	-0.00406901	-0.00123313	-0.00154875	-0.00443315	-0.00437924	-0.0044016	-0.00462587
3.78333	-0.0045844	-0.00451174	-0.00407335	-0.00123613	-0.0015535	-0.00443777	-0.00438334	-0.00440458	-0.0046309
3.8	-0.00458931	-0.00451701	-0.00407842	-0.00123978	-0.00155791	-0.0044425	-0.00438756	-0.00440766	-0.00463533
3.81667	-0.00459398	-0.00452228	-0.00408403	-0.00124398	-0.00156201	-0.00444691	-0.00439178	-0.00441064	-0.00463905
3.83333	-0.0045988	-0.00452717	-0.00408918	-0.00124815	-0.00156578	-0.0044512	-0.00439576	-0.00441359	-0.00464232
3.85	-0.00460376	-0.00453156	-0.00409321	-0.00125187	-0.00156957	-0.00445537	-0.00439967	-0.00441672	-0.00464521
3.86667	-0.00460903	-0.00453566	-0.00409583	-0.00125502	-0.00157372	-0.0044598	-0.00440337	-0.00442024	-0.00464802
3.88333	-0.00461441	-0.00453978	-0.00409759	-0.00125776	-0.00157803	-0.00446431	-0.00440694	-0.00442399	-0.00465078
3.9	-0.00461963	-0.00454393	-0.00409943	-0.00126043	-0.00158216	-0.00446886	-0.0044104	-0.00442785	-0.00465372
3.91667	-0.00462447	-0.00454817	-0.00410193	-0.00126315	-0.00158609	-0.00447304	-0.00441369	-0.00443152	-0.00465689
3.93333	-0.00462881	-0.00455208	-0.00410551	-0.00126587	-0.00158974	-0.00447668	-0.00441688	-0.00443493	-0.00466037
3.95	-0.00463289	-0.00455559	-0.00410961	-0.00126868	-0.0015932	-0.00448007	-0.00442029	-0.00443803	-0.00466449
3.96667	-0.00463706	-0.00455881	-0.00411383	-0.00127152	-0.00159649	-0.00448369	-0.0044242	-0.00444092	-0.00466933
3.98333	-0.0046414	-0.00456203	-0.00411791	-0.00127447	-0.00159968	-0.00448791	-0.00442854	-0.00444394	-0.00467491
4	-0.00464579	-0.0045656	-0.00412143	-0.00127714	-0.00160276	-0.00449285	-0.00443302	-0.00444723	-0.00468109
4.01667	-0.00464989	-0.00456999	-0.00412444	-0.00127926	-0.00160571	-0.00449807	-0.00443739	-0.00445095	-0.00468769
4.03333	-0.00465361	-0.0045749	-0.00412701	-0.00128143	-0.00160855	-0.00450289	-0.00444132	-0.00445479	-0.00469475
4.05	-0.00465733	-0.00457977	-0.00412956	-0.00128394	-0.00161125	-0.00450694	-0.00444492	-0.00445892	-0.00470242
4.06667	-0.00466131	-0.00458394	-0.00413226	-0.00128737	-0.0016143	-0.00451032	-0.00444824	-0.00446302	-0.00471063
4.08333	-0.00466577	-0.00458706	-0.00413519	-0.00129159	-0.00161783	-0.00451347	-0.00445076	-0.00446681	-0.00471902
4.1	-0.00467035	-0.00458928	-0.00413815	-0.00129583	-0.00162176	-0.00451657	-0.00445145	-0.00447024	-0.00472696
4.11667	-0.00467464	-0.0045913	-0.00414134	-0.00129951	-0.00162579	-0.00451977	-0.00445036	-0.00447329	-0.0047343
4.13333	-0.00467845	-0.0045935	-0.00414482	-0.00130251	-0.00162958	-0.00452294	-0.00444885	-0.00447606	-0.00474079
4.15	-0.0046821	-0.00459622	-0.00414873	-0.00130494	-0.00163311	-0.00452587	-0.00444933	-0.00447873	-0.00474658
4.16667	-0.00468563	-0.00459946	-0.00415272	-0.00130723	-0.00163652	-0.00452875	-0.00445267	-0.00448145	-0.00475163
4.18333	-0.00468897	-0.00460299	-0.00415655	-0.00130962	-0.00163985	-0.00453181	-0.00445811	-0.0044839	-0.00475566
4.2	-0.00469218	-0.00460637	-0.00416003	-0.00131238	-0.00164319	-0.00453517	-0.00446383	-0.00448638	-0.00475853
4.21667	-0.00469548	-0.00460933	-0.00416318	-0.00131517	-0.00164653	-0.00453858	-0.00446831	-0.00448879	-0.00476005
4.23333	-0.0046991	-0.00461202	-0.00416631	-0.00131813	-0.0016498	-0.00454194	-0.00447167	-0.00449139	-0.00476096
4.25	-0.00470306	-0.00461481	-0.00416933	-0.00132123	-0.00165294	-0.00454502	-0.00447456	-0.00449413	-0.00476196
4.26667	-0.00470706	-0.00461798	-0.00417248	-0.00132425	-0.00165604	-0.00454792	-0.00447732	-0.00449711	-0.00476365
4.28333	-0.00471085	-0.00462137	-0.00417548	-0.001327	-0.00165931	-0.00455069	-0.00448004	-0.00450026	-0.00476599
4.3	-0.00471436	-0.00462468	-0.00417832	-0.0013294	-0.00166293	-0.00455343	-0.00448285	-0.0045035	-0.00476847
4.31667	-0.00471782	-0.00462773	-0.00418078	-0.00133162	-0.0016668	-0.0045561	-0.00448571	-0.00450669	-0.0047708
4.33333	-0.00472146	-0.00463069	-0.00418304	-0.00133415	-0.00167049	-0.0045588	-0.00448848	-0.00450979	-0.00477297
4.35	-0.00472487	-0.00463391	-0.00418519	-0.00133708	-0.00167366	-0.00456158	-0.00449117	-0.00451261	-0.00477481
4.36667	-0.00472788	-0.00463734	-0.00418719	-0.0013402	-0.00167609	-0.00456454	-0.00449394	-0.0045153	-0.00477645
4.38333	-0.00473045	-0.00464097	-0.00418919	-0.00134316	-0.00167788	-0.00456752	-0.00449687	-0.00451785	-0.0047776
4.4	-0.00473312	-0.00464452	-0.00419101	-0.00134569	-0.00167931	-0.00457026	-0.00449995	-0.00452031	-0.00477829
4.41667	-0.00473634	-0.00464798	-0.00419306	-0.00134786	-0.00168089	-0.00457293	-0.00450295	-0.00452281	-0.00477822
4.43333	-0.00474016	-0.00465136	-0.0041958	-0.0013496	-0.00168315	-0.0045756	-0.00450581	-0.0045252	-0.00477722
4.45	-0.00474421	-0.00465479	-0.00419902	-0.00135134	-0.0016858	-0.00457854	-0.00450872	-0.00452737	-0.00477552
4.46667	-0.00474776	-0.00465823	-0.00420247	-0.00135298	-0.00168859	-0.00458164	-0.0045117	-0.00452913	-0.00477304
4.48333	-0.00475048	-0.00466166	-0.0042056	-0.00135484	-0.00169095	-0.00458462	-0.00451495	-0.00453056	-0.00477033
4.5	-0.00475229	-0.00466486	-0.00420846	-0.00135706	-0.00169295	-0.00458745	-0.00451838	-0.0045319	-0.00476785
4.51667	-0.0047537	-0.00466786	-0.0042112	-0.00135968	-0.00169502	-0.0045901	-0.00452184	-0.00453345	-0.00476637
4.53333	-0.00475518	-0.00467067	-0.00421444	-0.00136243	-0.00169762	-0.00459289	-0.00452527	-0.00453535	-0.00476696
4.55	-0.00475737	-0.00467354	-0.00421826	-0.00136519	-0.00170091	-0.00459594	-0.00452827	-0.00453769	-0.00476956
4.56667	-0.00476004	-0.00467632	-0.00422233	-0.00136762	-0.00170432	-0.00459907	-0.00453085	-0.00454034	-0.00477376
4.58333	-0.00476283	-0.00467904	-0.00422629	-0.00136984	-0.0017074	-0.00460204	-0.00453299	-0.0045431	-0.00477884
4.6	-0.00476571	-0.00468162	-0.00422975	-0.00137163	-0.00170959	-0.00460502	-0.00453514	-0.00454606	-0.00478437
4.61667	-0.00476869	-0.00468422	-0.00423258	-0.0013733	-0.00171145	-0.00460829	-0.0045376	-0.00454889	-0.00478993
4.63333	-0.00477205	-0.00468696	-0.00423483	-0.00137487	-0.00171331	-0.00461177	-0.00454007	-0.00455152	-0.00479526
4.65	-0.00477587	-0.00468963	-0.00423652	-0.00137637	-0.00171572	-0.0046154	-0.00454229	-0.00455376	-0.00479992
4.66667	-0.00477976	-0.00469206	-0.00423771	-0.00137802	-0.0017187	-0.00461854	-0.0045441	-0.00455574	-0.00480366
4.68333	-0.00478307	-0.0046943	-0.00423874	-0.00137985	-0.00172154	-0.00462095	-0.00454592	-0.00455729	-0.00480688
4.7	-0.00478557	-0.00469659	-0.00424002	-0.00138202	-0.00172383	-0.00462281	-0.00454823	-0.00455879	-0.00481017
4.71667	-0.00478729	-0.00469914	-0.00424179	-0.00138398	-0.00172535	-0.00462453	-0.00455106	-0.0045601	-0.00481396
4.73333	-0.00478853	-0.00470172	-0.00424405	-0.00138541	-0.0017264	-0.00462658	-0.00455385	-0.00456117	-0.00481806
4.75	-0.00478975	-0.00470398	-0.00424601	-0.00138601	-0.00172721	-0.00462853	-0.00455619	-0.00456208	-0.00482185
4.76667	-0.00479115	-0.00470546	-0.00424711	-0.00138586	-0.00172728	-0.00463011	-0.0045576	-0.0045626	-0.00482519
4.78333	-0.00479263	-0.00470605	-0.00424684	-0.00138474	-0.00172597	-0.00463099	-0.00455812	-0.00456282	-0.00482774
4.8	-0.00479356	-0.00470563	-0.0042452	-0.00138236	-0.00172285	-0.0046308	-0.0045581	-0.00456279	-0.00482969
4.81667	-0.0047933	-0.00470446	-0.00424269	-0.00137859	-0.00171808	-0.0046297	-0.00455767	-0.00456313	-0.004831
4.83333	-0.00479163	-0.00470281	-0.00424007	-0.00137358	-0.00171241	-0.00462808	-0.00455695	-0.00456389	-0.0048321
4.85	-0.0047887	-0.00470091	-0.00423783	-0.00136824	-0.00170685	-0.00462579	-0.00455645	-0.0045653	-0.00483324
4.86667	-0.00478493	-0.00469912	-0.00423635	-0.00136345	-0.00170211	-0.00462353	-0.00455652	-0.00456704	-0.00483484
4.88333	-0.00478142	-0.00469742	-0.00423559	-0.00135992	-0.00169824	-0.00462176	-0.0045576	-0.00456885	-0.00483746
4.9	-0.00477897	-0.00469616	-0.00423533	-0.00135787	-0.00169522	-0.0046211	-0.00455979	-0.00457069	-0.00484169
4.91667	-0.00477785	-0.00469535	-0.00423566	-0.00135728	-0.00169331	-0.00462133	-0.0045626	-0.00457274	-0.00484808
4.93333	-0.0047779	-0.00469513	-0.00423685	-0.00135832	-0.00169283	-0.00462255	-0.00456535	-0.00457505	-0.00485642
4.95	-0.00477878	-0.00469533	-0.00423917	-0.00136076	-0.00169472	-0.00462438	-0.00456783	-0.00457724	-0.00486589
4.96667	-0.00477992	-0.00469533	-0.00424212	-0.00136433	-0.00169824	-0.00462667	-0.00457021	-0.00457951	-0.00487583
4.98333	-0.00478119	-0.00469516	-0.00424541	-0.00136831	-0.0017027	-0.00462906	-0.00457286	-0.00458213	-0.00488584
5	-0.00478221	-0.00469459	-0.00424846	-0.00137215	-0.00170704	-0.00463135	-0.00457586	-0.0045853	-0.00489626
5.01667	-0.00478274	-0.00469371	-0.00425121	-0.00137518	-0.00171059	-0.00463323	-0.0045791	-0.00458888	-0.00490701
5.03333	-0.00478226	-0.00469268	-0.00425335	-0.00137764	-0.00171364	-0.00463476	-0.00458216	-0.00459241	-0.00491777
5.05	-0.00478119	-0.00469156	-0.00425483	-0.00137997	-0.0017166	-0.00463609	-0.00458475	-0.00459567	-0.00492773
5.06667	-0.00477985	-0.00469056	-0.00425581	-0.00138286	-0.00171975	-0.00463745	-0.00458666	-0.00459846	-0.00493627
5.08333	-0.00477866	-0.0046898	-0.00425659	-0.00138596	-0.0017228	-0.004639	-0.00458802	-0.00460106	-0.00494313
5.1	-0.00477794	-0.00468898	-0.00425724	-0.00138887	-0.00172538	-0.0046405	-0.00458921	-0.0046033	-0.00494823
5.11667	-0.00477761	-0.00468801	-0.00425812	-0.00139089	-0.00172695	-0.00464155	-0.0045906	-0.00460516	-0.00495176
5.13333	-0.00477725	-0.00468627	-0.00425898	-0.00139189	-0.00172755	-0.00464203	-0.00459174	-0.00460604	-0.004954
5.15	-0.00477637	-0.00468343	-0.00425941	-0.00139151	-0.0017274	-0.00464174	-0.00459243	-0.00460593	-0.00495496
5.16667	-0.00477415	-0.00467918	-0.0042591	-0.00138996	-0.00172621	-0.00464115	-0.00459183	-0.00460473	-0.00495462
5.18333	-0.00476965	-0.00467296	-0.0042575	-0.00138667	-0.00172359	-0.00464017	-0.00459021	-0.00460259	-0.00495241
5.2	-0.00476183	-0.00466345	-0.00425447	-0.00138121	-0.00171846	-0.00463848	-0.00458711	-0.00459908	-0.00494738
5.21667	-0.00474948	-0.00464924	-0.00424973	-0.00137282	-0.00170997	-0.00463535	-0.00458187	-0.00459296	-0.00493824
5.23333	-0.00473181	-0.00462838	-0.00424267	-0.00136054	-0.00169658	-0.00462994	-0.00457276	-0.00458242	-0.00492382
5.25	-0.00470833	-0.00460005	-0.00423247	-0.00134297	-0.00167769	-0.00462112	-0.00455755	-0.00456585	-0.00490253
5.26667	-0.0046791	-0.00456434	-0.0042184	-0.00131851	-0.00165273	-0.00460789	-0.00453471	-0.00454198	-0.00487299
5.28333	-0.00464433	-0.00452228	-0.00420038	-0.00128544	-0.00162233	-0.00458981	-0.00450264	-0.00451022	-0.00483437
5.3	-0.00460461	-0.00447674	-0.00417863	-0.00124286	-0.00158781	-0.00456681	-0.00446121	-0.00447065	-0.00478635
5.31667	-0.00456179	-0.00443121	-0.00415438	-0.00119131	-0.00155152	-0.00454082	-0.00441102	-0.00442454	-0.00472965
5.33333	-0.00451807	-0.00438936	-0.00412954	-0.00113295	-0.00151657	-0.00451342	-0.00435382	-0.0043739	-0.00466673
5.35	-0.0044758	-0.00435348	-0.00410587	-0.00107101	-0.00148593	-0.00448644	-0.00429283	-0.00432154	-0.00460112
5.36667	-0.00443624	-0.00432394	-0.00408441	-0.00100899	-0.00146138	-0.00446064	-0.0042322	-0.00427092	-0.00453744
5.38333	-0.00439974	-0.00429862	-0.00406526	-0.000949961	-0.00144175	-0.00443589	-0.00417625	-0.00422558	-0.0044801
5.4	-0.00436465	-0.00427428	-0.00404719	-0.000896078	-0.00142454	-0.00441176	-0.00412852	-0.00418831	-0.0044327
5.41667	-0.00432893	-0.00424765	-0.00402838	-0.000849277	-0.00140659	-0.00438823	-0.00409099	-0.00416054	-0.00439653
5.43333	-0.00428971	-0.00421673	-0.00400644	-0.000810009	-0.00138618	-0.00436565	-0.00406328	-0.00414153	-0.00437076
5.45	-0.0042431	-0.00418058	-0.00397903	-0.000778228	-0.00136281	-0.00434513	-0.0040434	-0.00412902	-0.00435305
5.46667	-0.00418271	-0.00413926	-0.00394315	-0.000752383	-0.0013357	-0.00432686	-0.00402893	-0.00412031	-0.00434031
5.48333	-0.00409814	-0.0040932	-0.00389575	-0.00073052	-0.00130185	-0.00431082	-0.00401787	-0.00411373	-0.0043308
5.5	-0.00397531	-0.00404246	-0.003833	-0.000709754	-0.00125519	-0.0042962	-0.00400909	-0.00410849	-0.00432343
5.51667	-0.00379687	-0.0039866	-0.00375072	-0.000686246	-0.00118791	-0.00428204	-0.00400199	-0.0041051	-0.00431769
5.53333	-0.00354584	-0.00392523	-0.00364443	-0.000654036	-0.00109254	-0.00426678	-0.00399626	-0.00410401	-0.00431354
5.55	-0.00320913	-0.0038581	-0.0035092	-0.000605112	-0.000964057	-0.00424885	-0.00399226	-0.00410529	-0.00431111
5.56667	-0.00278097	-0.00378624	-0.00334054	-0.000529176	-0.000802052	-0.00422613	-0.00399042	-0.00410889	-0.00431056
5.58333	-0.00226461	-0.00371087	-0.00313536	-0.000414974	-0.000610244	-0.00419618	-0.003991	-0.00411378	-0.00431189
5.6	-0.00167102	-0.00363367	-0.00289224	-0.000252181	-0.000395668	-0.0041568	-0.00399388	-0.004119	-0.0043149
5.61667	-0.00101577	-0.00355559	-0.00261244	-3.40521e-05	-0.000166523	-0.00410532	-0.00399834	-0.00412389	-0.00431883
5.63333	-0.000316703	-0.00347787	-0.00229906	0.00024206	7.00831e-05	-0.00403981	-0.00400342	-0.00412873	-0.00432303
5.65	0.000408614	-0.00340141	-0.0019564	0.000574177	0.000308979	-0.00395865	-0.00400888	-0.00413433	-0.00432722
5.66667	0.00114201	-0.00332723	-0.00159038	0.000956672	0.000547516	-0.00386137	-0.00401448	-0.00414144	-0.00433178
5.68333	0.00186473	-0.00325549	-0.00120691	0.00138177	0.000784624	-0.00374817	-0.00402063	-0.00414981	-0.00433683
5.7	0.00255743	-0.00318587	-0.000811994	0.00184135	0.0010204	-0.00361943	-0.00402757	-0.00415896	-0.0043422
5.71667	0.00320119	-0.00311766	-0.00041002	0.00232803	0.00125479	-0.00347504	-0.00403518	-0.00416812	-0.00434744
5.73333	0.00377847	-0.00304971	-3.27825e-06	0.00283644	0.00148715	-0.00331454	-0.00404359	-0.00417706	-0.00435219
5.75	0.00427436	-0.00298076	0.000407755	0.00336205	0.00171629	-0.00313634	-0.00405241	-0.00418569	-0.00435634
5.76667	0.00467809	-0.00290888	0.000825298	0.00390024	0.00194057	-0.00293834	-0.00406121	-0.00419434	-0.0043602
5.78333	0.00498396	-0.00283168	0.0012535	0.00444512	0.00215851	-0.00271882	-0.00406982	-0.00420304	-0.00436363
5.8	0.00519263	-0.00274652	0.00169975	0.00499024	0.00236963	-0.00247607	-0.00407823	-0.00421161	-0.00436675
5.81667	0.00531174	-0.00265046	0.00217515	0.00552949	0.00257479	-0.00220963	-0.00408665	-0.00421997	-0.00436974
5.83333	0.00535496	-0.00254093	0.00269419	0.00606009	0.00277633	-0.00191967	-0.00409511	-0.00422794	-0.00437272
5.85	0.00534111	-0.00241502	0.00327317	0.00658163	0.00297796	-0.00160708	-0.00410351	-0.00423521	-0.00437562
5.86667	0.00529167	-0.00226927	0.00392636	0.00709602	0.00318445	-0.00127248	-0.00411159	-0.0042415	-0.0043782
5.88333	0.00522908	-0.00210026	0.00466231	0.00760481	0.00340065	-0.000916427	-0.00411907	-0.00424696	-0.00437987
5.9	0.005174	-0.0019043	0.00548183	0.00810839	0.00363113	-0.000538391	-0.00412563	-0.00425178	-0.00438113
5.91667	0.00514346	-0.00167816	0.00637738	0.0086054	0.00387951	-0.000136298	-0.00413112	-0.00425626	-0.0043823
5.93333	0.00514921	-0.00141938	0.00733508	0.00909285	0.00414885	0.000293928	-0.00413553	-0.00426039	-0.00438366
5.95	0.00519763	-0.00112582	0.00833756	0.00956778	0.00444139	0.000758511	-0.00413932	-0.00426425	-0.00438504
5.96667	0.00529064	-0.000794822	0.00936681	0.0100294	0.00475925	0.00126467	-0.00414287	-0.00426768	-0.00438588
5.98333	0.00542699	-0.00042339	0.010407	0.0104797	0.00510474	0.00182007	-0.00414659	-0.00427052	-0.00438566
6	0.00560402	-8.20756e-06	0.011445	0.0109243	0.00548056	0.00243145	-0.00415021	-0.00427257	-0.00438395
6.01667	0.00581847	0.000453824	0.0124724	0.0113712	0.00589031	0.00310484	-0.00415343	-0.00427352	-0.00438065
6.03333	0.00606798	0.000965446	0.013484	0.0118286	0.00633844	0.00384417	-0.00415553	-0.00427321	-0.00437617
6.05	0.00635103	0.00152943	0.0144785	0.0123044	0.00682913	0.00465169	-0.00415577	-0.00427169	-0.00437076
6.06667	0.00666724	0.00214822	0.0154574	0.0128046	0.0073665	0.005528	-0.00415391	-0.00426918	-0.00436463
6.08333	0.00701779	0.00282449	0.0164246	0.0133341	0.00795406	0.00647226	-0.0041499	-0.00426532	-0.00435739
6.1	0.00740558	0.00356101	0.0173865	0.0138963	0.00859536	0.00748292	-0.00414413	-0.00425934	-0.0043484
6.11667	0.00783433	0.00436065	0.0183507	0.0144942	0.00929421	0.00855838	-0.00413657	-0.00425035	-0.00433681
6.13333	0.00830911	0.00522606	0.0193267	0.0151295	0.0100543	0.00969713	-0.00412656	-0.00423764	-0.00432169
6.15	0.00883485	0.00615939	0.0203255	0.0158024	0.0108798	0.010898	-0.004113	-0.004221	-0.00430229
6.16667	0.00941633	0.00716228	0.0213592	0.0165112	0.0117747	0.0121604	-0.00409492	-0.00420009	-0.00427775
6.18333	0.0100578	0.00823628	0.0224411	0.0172524	0.0127437	0.0134852	-0.0040712	-0.00417441	-0.00424762
6.2	0.0107621	0.00938258	0.0235842	0.0180222	0.0137907	0.0148746	-0.00404109	-0.00414306	-0.00421128
6.21667	0.0115313	0.0106018	0.0248019	0.0188179	0.0149195	0.0163331	-0.00400392	-0.00410494	-0.00416858
6.23333	0.0123667	0.0118933	0.0261075	0.0196394	0.0161323	0.0178669	-0.00395914	-0.00405904	-0.00411911
6.25	0.0132692	0.0132554	0.0275131	0.0204898	0.0174303	0.0194835	-0.00390588	-0.00400459	-0.00406194
6.26667	0.0142395	0.0146856	0.0290293	0.0213745	0.0188133	0.0211909	-0.00384365	-0.00394074	-0.00399602
6.28333	0.0152784	0.0161819	0.0306625	0.0223002	0.0202801	0.0229968	-0.00377103	-0.00386692	-0.00392003
6.3	0.0163858	0.0177426	0.0324148	0.0232734	0.0218287	0.0249065	-0.00368701	-0.00378209	-0.0038327
6.31667	0.0175617	0.0193653	0.0342843	0.0243004	0.0234567	0.026923	-0.00358995	-0.00368525	-0.0037327
6.33333	0.0188059	0.0210469	0.036265	0.0253872	0.0251611	0.0290445	-0.00347813	-0.00357462	-0.00361872
6.35	0.0201174	0.0227826	0.0383473	0.0265401	0.0269381	0.0312634	-0.00335001	-0.00344795	-0.00348966
6.36667	0.0214959	0.024567	0.0405178	0.0277646	0.0287834	0.0335661	-0.00320381	-0.00330309	-0.00334396
6.38333	0.0229409	0.0263932	0.042761	0.0290639	0.0306914	0.0359339	-0.00303766	-0.00313827	-0.00317998
6.4	0.0244528	0.0282536	0.0450602	0.0304393	0.0326566	0.038344	-0.00284995	-0.00295268	-0.00299594
6.41667	0.0260322	0.0301396	0.0473993	0.031889	0.0346727	0.040773	-0.00263864	-0.00274469	-0.00279
6.43333	0.0276796	0.0320416	0.0497626	0.0334087	0.0367328	0.043199	-0.00240217	-0.0025129	-0.00256083
6.45	0.0293958	0.0339501	0.0521347	0.0349911	0.038829	0.0456022	-0.00213925	-0.00225495	-0.00230696
6.46667	0.0311802	0.0358553	0.0544998	0.0366266	0.0409525	0.0479654	-0.0018483	-0.00196923	-0.00202723
6.48333	0.0330313	0.0377483	0.0568403	0.0383036	0.0430941	0.0502717	-0.00152751	-0.00165442	-0.00172045
6.5	0.0349453	0.0396207	0.0591368	0.0400087	0.0452438	0.0525039	-0.00117503	-0.00130962	-0.00138509
6.51667	0.0369179	0.0414656	0.0613665	0.041728	0.0473913	0.0546447	-0.000788581	-0.000933421	-0.00101976
6.53333	0.0389434	0.0432766	0.0635046	0.0434474	0.0495263	0.0566759	-0.000365913	-0.00052346	-0.000623035
6.55	0.0410166	0.0450494	0.0655259	0.0451535	0.0516393	0.0585798	9.53078e-05	-7.69734e-05	-0.000192738
6.56667	0.0431324	0.0467827	0.0674079	0.0468348	0.0537219	0.06034	0.000597847	0.00040921	0.000273657
6.58333	0.045286	0.0484776	0.069135	0.0484823	0.0557686	0.0619426	0.00114418	0.00093807	0.000779986
6.6	0.047473	0.0501382	0.0707001	0.0500909	0.0577761	0.063378	0.00173699	0.00151242	0.00133002
6.61667	0.0496891	0.0517714	0.0721059	0.0516579	0.0597433	0.0646425	0.00237852	0.00213474	0.00192728
6.63333	0.0519294	0.0533863	0.0733644	0.0531833	0.0616716	0.06574	0.00307127	0.00280746	0.00257471
6.65	0.0541881	0.0549931	0.0744943	0.0546682	0.0635643	0.0666809	0.00381814	0.00353295	0.00327446
6.66667	0.0564585	0.0566016	0.0755192	0.0561149	0.065427	0.0674831	0.00462159	0.00431379	0.00402815
6.68333	0.0587336	0.0582195	0.0764649	0.0575272	0.0672677	0.0681686	0.00548361	0.00515229	0.00483735
6.7	0.0610083	0.0598537	0.0773587	0.0589107	0.0690971	0.0687627	0.00640546	0.00605022	0.00570381
6.71667	0.0632821	0.0615101	0.0782287	0.0602728	0.0709278	0.0692929	0.00738727	0.00700847	0.0066292
6.73333	0.0655611	0.0631955	0.0791044	0.0616228	0.0727752	0.0697879	0.00842952	0.00802721	0.00761492
6.75	0.0678605	0.0649182	0.080017	0.062974	0.0746558	0.0702767	0.00953223	0.00910631	0.00866132
6.76667	0.0702044	0.0666897	0.0810003	0.0643434	0.0765868	0.0707866	0.0106953	0.0102452	0.00976794
6.78333	0.0726257	0.0685252	0.0820908	0.0657519	0.0785862	0.0713417	0.0119185	0.0114431	0.0109335
6.8	0.0751637	0.0704461	0.0833274	0.0672227	0.0806714	0.0719623	0.0132008	0.0126995	0.0121565
6.81667	0.0778616	0.0724797	0.0847508	0.0687787	0.0828582	0.0726643	0.0145413	0.0140138	0.0134354
6.83333	0.0807612	0.074659	0.0864015	0.0704389	0.0851581	0.0734608	0.0159399	0.0153852	0.0147691
6.85	0.0838955	0.0770195	0.0883179	0.0722166	0.0875775	0.0743634	0.0173963	0.016813	0.0161568
6.86667	0.0872803	0.0795951	0.090533	0.0741176	0.0901164	0.0753851	0.0189108	0.018296	0.0175976
6.88333	0.0909069	0.0824128	0.0930715	0.0761417	0.0927715	0.0765447	0.0204843	0.0198337	0.0190909
6.9	0.0947378	0.0854886	0.0959439	0.0782848	0.0955391	0.0778693	0.0221181	0.0214268	0.0206366
6.91667	0.0987109	0.0888263	0.099143	0.080543	0.0984174	0.079395	0.023815	0.0230785	0.0222361
6.93333	0.102749	0.0924207	0.102646	0.0829142	0.10141	0.0811654	0.0255802	0.0247934	0.0238925
6.95	0.106777	0.0962622	0.106421	0.085399	0.104523	0.0832269	0.0274215	0.0265779	0.0256115
6.96667	0.11074	0.100341	0.110445	0.0879969	0.107768	0.0856223	0.0293479	0.0284395	0.0274001
6.98333	0.114616	0.10465	0.114714	0.0907028	0.111159	0.0883837	0.0313664	0.0303837	0.029264
7	0.118429	0.109186	0.119254	0.0935025	0.114708	0.0915249	0.0334786	0.0324106	0.0312038
7.01667	0.122249	0.113948	0.124113	0.0963727	0.118426	0.0950355	0.0356757	0.0345109	0.0332112
7.03333	0.12618	0.118941	0.129346	0.0992848	0.122321	0.0988799	0.0379371	0.036664	0.0352666
7.05	0.130342	0.124168	0.134992	0.102213	0.126393	0.103001	0.0402307	0.0388389	0.0373409
7.06667	0.13485	0.129628	0.141057	0.105143	0.13064	0.107329	0.0425177	0.0409992	0.0393997
7.08333	0.139787	0.135311	0.147508	0.108077	0.135054	0.111797	0.0447596	0.0431099	0.0414098
7.1	0.1452	0.141199	0.154284	0.111034	0.139629	0.116352	0.0469264	0.045145	0.0433469
7.11667	0.151091	0.14727	0.161313	0.114045	0.144361	0.120968	0.0490039	0.047094	0.0452004
7.13333	0.15743	0.153492	0.168535	0.11715	0.14925	0.12565	0.0509978	0.0489644	0.0469768
7.15	0.164166	0.159825	0.175918	0.120385	0.154294	0.130428	0.0529344	0.0507822	0.0487006
7.16667	0.171235	0.166229	0.18346	0.123778	0.159495	0.13535	0.0548568	0.052588	0.0504099
7.18333	0.178572	0.172699	0.191188	0.127348	0.164846	0.140464	0.056819	0.0544322	0.0521522
7.2	0.186111	0.179272	0.199142	0.131096	0.170341	0.145806	0.0588785	0.0563671	0.0539768
7.21667	0.193786	0.186012	0.20737	0.135019	0.175974	0.151388	0.061087	0.0584397	0.0559287
7.23333	0.201538	0.192982	0.215916	0.139109	0.18175	0.157193	0.0634833	0.0606841	0.0580407
7.25	0.209324	0.200213	0.22481	0.143365	0.187692	0.163184	0.0660874	0.0631184	0.0603305
7.26667	0.217123	0.207719	0.23407	0.147793	0.19384	0.169312	0.0688992	0.0657432	0.0627994
7.28333	0.224945	0.215509	0.243695	0.152405	0.200253	0.175533	0.0719025	0.068545	0.0654347
7.3	0.232827	0.2236	0.253671	0.157212	0.206994	0.181828	0.0750706	0.0714999	0.0682145
7.31667	0.240829	0.231997	0.263973	0.162217	0.214121	0.188209	0.0783718	0.0745776	0.0711113
7.33333	0.249016	0.240698	0.274573	0.167419	0.221683	0.194726	0.0817735	0.0777449	0.0740941
7.35	0.25745	0.249683	0.285444	0.17282	0.229714	0.201459	0.0852429	0.0809673	0.0771292
7.36667	0.266188	0.258929	0.296569	0.178443	0.23825	0.208502	0.0887481	0.084211	0.0801816
7.38333	0.275287	0.268422	0.307945	0.184351	0.247329	0.215958	0.092259	0.0874446	0.0832181
7.4	0.284822	0.278177	0.319588	0.190655	0.257	0.223936	0.0957494	0.0906416	0.0862111
7.41667	0.294897	0.288256	0.33154	0.1975	0.267316	0.232554	0.0991995	0.0937834	0.0891425
7.43333	0.305644	0.298772	0.343865	0.205054	0.278327	0.241948	0.102598	0.0968626	0.0920063
7.45	0.317211	0.309879	0.356658	0.213474	0.290073	0.252267	0.105947	0.0998866	0.0948112
7.46667	0.329748	0.321746	0.370034	0.222887	0.302581	0.263671	0.109264	0.10288	0.0975824
7.48333	0.343381	0.334527	0.384125	0.233369	0.315867	0.276309	0.112587	0.105884	0.100362
7.5	0.35821	0.348336	0.399073	0.244938	0.329937	0.290313	0.115973	0.108956	0.103204
7.51667	0.374303	0.363247	0.415016	0.25756	0.344789	0.305777	0.119496	0.112165	0.106174
7.53333	0.391702	0.379305	0.432085	0.271152	0.360407	0.32276	0.12324	0.115586	0.10934
7.55	0.410418	0.396548	0.450394	0.285598	0.376756	0.341275	0.127296	0.1193	0.112774
7.56667	0.430426	0.415015	0.470028	0.30077	0.393771	0.361277	0.13176	0.123391	0.116552
7.58333	0.451648	0.434746	0.491029	0.316528	0.411363	0.382659	0.136729	0.127946	0.120754
7.6	0.473945	0.455761	0.513379	0.33274	0.42942	0.405234	0.142302	0.133054	0.125463
7.61667	0.497111	0.478041	0.536984	0.349281	0.447823	0.428733	0.148575	0.1388	0.130759
7.63333	0.520884	0.501516	0.561675	0.366034	0.466446	0.452819	0.15563	0.145259	0.136713
7.65	0.54497	0.526051	0.587223	0.382889	0.485169	0.477115	0.163527	0.152485	0.143377
7.66667	0.569067	0.551461	0.613366	0.399746	0.503866	0.501242	0.172298	0.160508	0.150781
7.68333	0.592896	0.577522	0.639837	0.416498	0.522403	0.524869	0.181953	0.169337	0.158934
7.7	0.616211	0.603994	0.666374	0.433029	0.540633	0.547741	0.192476	0.178959	0.167825
7.71667	0.638798	0.630622	0.692722	0.449206	0.558395	0.569692	0.203841	0.189352	0.177435
7.73333	0.66047	0.657132	0.718626	0.464875	0.575518	0.590633	0.216004	0.200479	0.187732
7.75	0.681055	0.683214	0.74382	0.479867	0.591831	0.610527	0.228899	0.212282	0.198666
7.76667	0.700389	0.708511	0.768025	0.493998	0.607167	0.629352	0.242424	0.224672	0.210162
7.78333	0.718321	0.732635	0.790942	0.507083	0.621372	0.64706	0.256425	0.237511	0.222102
7.8	0.734721	0.755198	0.812255	0.518949	0.634324	0.663562	0.270693	0.250614	0.234324
7.81667	0.749485	0.775837	0.831644	0.529459	0.645933	0.678719	0.284969	0.263755	0.246628
7.83333	0.762553	0.79425	0.848813	0.53854	0.656156	0.692353	0.298974	0.276691	0.258795
7.85	0.773917	0.810214	0.863514	0.546204	0.665011	0.704281	0.312433	0.289184	0.270613
7.86667	0.783617	0.823585	0.875576	0.552566	0.672584	0.714346	0.325114	0.301036	0.2819
7.88333	0.791757	0.834318	0.884926	0.55785	0.679049	0.722466	0.336841	0.312098	0.292522
7.9	0.798501	0.842465	0.89161	0.562392	0.68467	0.728683	0.347501	0.322273	0.302386
7.91667	0.804087	0.848188	0.895821	0.566622	0.689804	0.733195	0.357041	0.33151	0.311438
7.93333	0.808839	0.851759	0.897908	0.571056	0.694893	0.736372	0.365451	0.339787	0.319642
7.95	0.813174	0.853568	0.898383	0.576275	0.700453	0.738739	0.372749	0.347095	0.32697
7.96667	0.81761	0.854118	0.897907	0.582917	0.707056	0.740948	0.378982	0.353441	0.333401
7.98333	0.822757	0.854031	0.897255	0.591662	0.715314	0.743725	0.384226	0.358856	0.338935
8	0.829309	0.854041	0.897286	0.603205	0.725866	0.747829	0.388616	0.363425	0.34362
8.01667	0.838025	0.854998	0.898892	0.618206	0.73935	0.754015	0.392366	0.367315	0.347584
8.03333	0.849706	0.857855	0.902966	0.637229	0.756377	0.763	0.395793	0.370795	0.351056
8.05	0.865167	0.863665	0.910384	0.660668	0.777484	0.77544	0.399322	0.374238	0.354369
8.06667	0.885191	0.873547	0.92198	0.688696	0.803088	0.791908	0.403471	0.378115	0.357949
8.08333	0.910456	0.888624	0.938518	0.721251	0.833447	0.812863	0.40882	0.382958	0.362294
8.1	0.94146	0.909934	0.960652	0.758066	0.868632	0.838627	0.415972	0.389333	0.367937
8.11667	0.978439	0.938318	0.988865	0.798748	0.908537	0.86936	0.425514	0.397803	0.375426
8.13333	1.02133	0.974314	1.02342	0.842869	0.952907	0.905051	0.437987	0.4089	0.385293
8.15	1.06976	1.01808	1.06434	0.890049	1.0014	0.945531	0.453865	0.42311	0.398038
8.16667	1.12315	1.06938	1.1114	0.940024	1.05365	0.99051	0.473546	0.440861	0.414115
8.18333	1.18076	1.12758	1.16416	0.992652	1.10927	1.03963	0.497345	0.46251	0.433912
8.2	1.24182	1.1918	1.22204	1.04789	1.16792	1.09249	0.525487	0.488328	0.457741
8.21667	1.3056	1.26097	1.28436	1.10574	1.22926	1.14874	0.558097	0.518492	0.485812
8.23333	1.37148	1.33395	1.3504	1.16612	1.29289	1.20799	0.59519	0.553059	0.518216
8.25	1.43892	1.40965	1.41942	1.22881	1.35834	1.26992	0.636663	0.591953	0.554907
8.26667	1.50743	1.48701	1.49067	1.2934	1.42502	1.33414	0.682284	0.634967	0.595696
8.28333	1.57654	1.56506	1.56336	1.35928	1.49221	1.40023	0.731699	0.681762	0.640267
8.3	1.64567	1.64287	1.63662	1.42572	1.55912	1.46765	0.784438	0.731896	0.688203
8.31667	1.71418	1.71952	1.70954	1.49187	1.6249	1.53577	0.839948	0.784857	0.739027
8.33333	1.78133	1.79415	1.78115	1.55691	1.68876	1.60387	0.897631	0.840106	0.792242
8.35	1.84637	1.86589	1.85051	1.6201	1.74996	1.67118	0.956896	0.897118	0.847374
8.36667	1.90854	1.93394	1.91675	1.68082	1.80793	1.73691	1.01719	0.955413	0.903989
8.38333	1.96721	1.99764	1.9791	1.73859	1.86223	1.80037	1.07802	1.01456	0.961705
8.4	2.02185	2.05647	2.03697	1.79306	1.91261	1.86094	1.13895	1.0742	1.02018
8.41667	2.07213	2.11011	2.08995	1.844	1.95893	1.91812	1.19962	1.13397	1.07908
8.43333	2.11788	2.15845	2.13779	1.89123	2.00115	1.9715	1.25966	1.19352	1.13806
8.45	2.15904	2.20148	2.18045	1.93463	2.03928	2.02077	1.31871	1.2525	1.19674
8.46667	2.1956	2.23935	2.218	1.97412	2.07331	2.06573	1.37639	1.31048	1.2547
8.48333	2.22759	2.27228	2.2506	2.00965	2.10322	2.10627	1.43229	1.36704	1.31149
8.5	2.25507	2.30052	2.27844	2.04115	2.129	2.14234	1.48596	1.4217	1.36665
8.51667	2.27811	2.32432	2.30167	2.06854	2.15059	2.17391	1.537	1.47401	1.41968
8.53333	2.2968	2.34386	2.32041	2.09168	2.16794	2.20098	1.585	1.5235	1.47013
8.55	2.31126	2.35925	2.33474	2.11037	2.18101	2.2235	1.62956	1.56977	1.51755
8.56667	2.32161	2.37057	2.34474	2.12437	2.18981	2.24142	1.67034	1.61243	1.56153
8.58333	2.32794	2.37783	2.35048	2.13339	2.19443	2.25468	1.70704	1.65115	1.60172
8.6	2.3304	2.38104	2.35204	2.1371	2.19502	2.26314	1.73939	1.68562	1.63779
8.61667	2.32919	2.38023	2.34949	2.13521	2.19185	2.26664	1.76714	1.71556	1.6694
8.63333	2.32469	2.37556	2.34292	2.12737	2.18522	2.26501	1.79008	1.74067	1.69622
8.65	2.31726	2.36725	2.33235	2.11325	2.17537	2.25802	1.80793	1.76061	1.71786
8.66667	2.3072	2.35561	2.31766	2.09239	2.16232	2.24531	1.82033	1.77493	1.73381
8.68333	2.29458	2.3409	2.29847	2.0642	2.14568	2.2263	1.82668	1.78294	1.74331
8.7	2.27921	2.32328	2.27409	2.02792	2.12452	2.20015	1.826	1.78356	1.74525
8.71667	2.2606	2.30274	2.24369	1.98287	2.0974	2.16591	1.81675	1.77513	1.73793
8.73333	2.23805	2.27905	2.20656	1.92889	2.06279	2.12296	1.79665	1.7553	1.71898
8.75	2.21064	2.2516	2.16251	1.86703	2.01976	2.07159	1.76279	1.72114	1.6855
8.76667	2.17743	2.21944	2.11194	1.79994	1.96867	2.01341	1.71221	1.66982	1.63466
8.78333	2.13763	2.18128	2.05586	1.73177	1.91155	1.95127	1.64324	1.59996	1.56508
8.8	2.09094	2.13589	1.99586	1.66737	1.852	1.88869	1.55717	1.51321	1.4784
8.81667	2.0379	2.08258	1.93415	1.61123	1.79442	1.82914	1.45916	1.41492	1.37998
8.83333	1.98029	2.02195	1.8736	1.56659	1.7431	1.77549	1.35736	1.31325	1.27796
8.85	1.92113	1.95639	1.81759	1.5352	1.70145	1.72988	1.26059	1.21677	1.18087
8.86667	1.86439	1.89006	1.76955	1.51754	1.67165	1.69387	1.1758	1.13207	1.0953
8.88333	1.81415	1.82822	1.73236	1.51331	1.65475	1.66864	1.10688	1.06271	1.02473
8.9	1.77389	1.77616	1.70792	1.52188	1.65099	1.65503	1.05508	1.00978	0.970179
8.91667	1.74596	1.73817	1.69704	1.54248	1.66	1.65352	1.02049	0.97327	0.931559
8.93333	1.73146	1.71698	1.69966	1.57429	1.68107	1.66408	1.00315	0.953189	0.908798
8.95	1.73054	1.71365	1.71511	1.6164	1.71311	1.68619	1.00341	0.949874	0.902182
8.96667	1.74265	1.72777	1.74243	1.66765	1.75476	1.7189	1.02168	0.963768	0.912123
8.98333	1.76679	1.75776	1.78046	1.72663	1.80445	1.761	1.05806	0.995038	0.938804
9	1.80165	1.80115	1.82784	1.79162	1.86043	1.81107	1.11203	1.04333	0.981945
9.01667	1.84562	1.85492	1.88303	1.86064	1.92085	1.86756	1.18245	1.10773	1.04077
9.03333	1.89695	1.91588	1.94427	1.93159	1.98383	1.92883	1.26759	1.18684	1.11411
9.05	1.95377	1.98112	2.00971	2.00248	2.04756	1.99313	1.36531	1.2789	1.20053
9.06667	2.01433	2.04823	2.07747	2.07153	2.11053	2.05873	1.47313	1.38194	1.29842
9.08333	2.07703	2.1154	2.1458	2.13735	2.17158	2.12395	1.58831	1.49375	1.40602
9.1	2.14053	2.18127	2.21304	2.19892	2.22995	2.18729	1.70777	1.61183	1.52135
9.11667	2.2036	2.24461	2.27759	2.25566	2.2852	2.24752	1.82819	1.73337	1.64208
9.13333	2.26492	2.30419	2.33789	2.30731	2.33696	2.30376	1.94602	1.85513	1.76544
9.15	2.32294	2.3588	2.39254	2.35384	2.38479	2.35541	2.05775	1.97358	1.88816
9.16667	2.37612	2.40753	2.44056	2.39533	2.42815	2.4021	2.16022	2.08513	2.00655
9.18333	2.42329	2.45004	2.48163	2.4319	2.46653	2.44367	2.25101	2.18653	2.11691
9.2	2.46397	2.48654	2.51608	2.46374	2.49971	2.48009	2.32875	2.27537	2.21598
9.21667	2.49844	2.51767	2.54475	2.49113	2.52787	2.51148	2.39329	2.35051	2.30159
9.23333	2.52745	2.5442	2.56858	2.51443	2.55156	2.53806	2.44556	2.41212	2.37296
9.25	2.55193	2.56679	2.58844	2.53399	2.57151	2.56018	2.48723	2.46147	2.4307
9.26667	2.57265	2.58595	2.60495	2.55005	2.58835	2.57825	2.52024	2.5005	2.47646
9.28333	2.59017	2.60197	2.61852	2.56282	2.60248	2.59273	2.54651	2.53127	2.51238
9.3	2.60478	2.61504	2.62944	2.57242	2.61409	2.60397	2.56761	2.55567	2.54065
9.31667	2.61656	2.62528	2.63783	2.57909	2.62326	2.61227	2.58469	2.57521	2.56311
9.33333	2.62555	2.6328	2.64382	2.58296	2.63007	2.6178	2.59858	2.59102	2.58116
9.35	2.63184	2.63767	2.64742	2.58405	2.63454	2.62064	2.6098	2.60385	2.59577
9.36667	2.63555	2.63995	2.6487	2.58227	2.63669	2.62074	2.61867	2.61419	2.60757
9.38333	2.63674	2.6396	2.64766	2.5774	2.63639	2.61803	2.62537	2.62228	2.61692
9.4	2.63533	2.63651	2.64423	2.56926	2.63338	2.61236	2.63003	2.62827	2.62404
9.41667	2.63111	2.63038	2.63815	2.55768	2.62727	2.60356	2.63273	2.63229	2.6291
9.43333	2.62371	2.62068	2.62896	2.54254	2.61752	2.59144	2.63352	2.63443	2.63227
9.45	2.61261	2.60663	2.61603	2.52365	2.60333	2.57576	2.63233	2.63468	2.63364
9.46667	2.5971	2.58717	2.59859	2.5008	2.58374	2.55623	2.62896	2.63294	2.63316
9.48333	2.57618	2.56108	2.57578	2.47384	2.55768	2.53249	2.62306	2.62896	2.63062
9.5	2.54869	2.52693	2.54655	2.44259	2.52415	2.50411	2.61413	2.62236	2.62566
9.51667	2.51336	2.48329	2.50979	2.40693	2.48239	2.47066	2.60155	2.61264	2.6178
9.53333	2.46905	2.42906	2.46448	2.36668	2.43214	2.43174	2.58448	2.5991	2.60641
9.55	2.41508	2.36402	2.40996	2.32172	2.37378	2.38709	2.56187	2.58087	2.59076
9.56667	2.35168	2.28941	2.34633	2.27201	2.30855	2.33662	2.53239	2.55688	2.56998
9.58333	2.28034	2.20798	2.27479	2.21771	2.23865	2.28041	2.4945	2.52591	2.54311
9.6	2.20362	2.12336	2.19764	2.1592	2.16714	2.21879	2.44664	2.48662	2.50896
9.61667	2.12448	2.03899	2.11774	2.0971	2.09724	2.1523	2.38731	2.43759	2.46614
9.63333	2.04536	1.95703	2.0375	2.03221	2.0313	2.08168	2.3153	2.37739	2.4131
9.65	1.96746	1.87805	1.95806	1.96541	1.96971	2.0078	2.22971	2.30455	2.34822
9.66667	1.89086	1.80148	1.87921	1.89757	1.91083	1.93168	2.1299	2.2176	2.26988
9.68333	1.81508	1.72641	1.80025	1.82955	1.85191	1.85447	2.01572	2.11532	2.17645
9.7	1.73975	1.65204	1.72087	1.76219	1.79053	1.77771	1.88797	1.99727	2.06684
9.71667	1.66472	1.5777	1.64147	1.69649	1.72552	1.70343	1.74905	1.86462	1.94128
9.73333	1.58969	1.50262	1.56257	1.63387	1.65689	1.63381	1.60317	1.72066	1.80202
9.75	1.51392	1.42613	1.48406	1.57631	1.58527	1.57023	1.45593	1.57064	1.65359
9.76667	1.43647	1.34829	1.4051	1.52557	1.51163	1.51216	1.31323	1.42091	1.50211
9.78333	1.35712	1.27041	1.32493	1.48181	1.43725	1.45708	1.17998	1.27753	1.35402
9.8	1.27707	1.19495	1.24396	1.44273	1.36383	1.40192	1.05926	1.14509	1.21478
9.81667	1.19891	1.12469	1.16426	1.40432	1.2931	1.34494	0.952167	1.02612	1.08793
9.83333	1.12575	1.06171	1.08888	1.36276	1.22634	1.28651	0.858248	0.921193	0.974981
9.85	1.05998	1.00677	1.02056	1.31591	1.16404	1.22822	0.776227	0.829523	0.875792
9.86667	1.00255	0.959457	0.960677	1.26339	1.10602	1.17117	0.704647	0.749688	0.789258
9.88333	0.952996	0.918656	0.909067	1.20581	1.05178	1.11501	0.642261	0.680204	0.713937
9.9	0.910086	0.883129	0.864614	1.14442	1.00086	1.05852	0.588123	0.619827	0.648469
9.91667	0.872444	0.851768	0.825986	1.08127	0.952989	1.00103	0.5415	0.567605	0.591744
9.93333	0.838887	0.82365	0.792047	1.01918	0.908014	0.943422	0.50173	0.522777	0.542877
9.95	0.808469	0.797986	0.761927	0.960824	0.865838	0.887964	0.468113	0.484644	0.501106
9.96667	0.780401	0.774076	0.734925	0.907758	0.826322	0.837221	0.439875	0.452475	0.465687
9.98333	0.753999	0.751308	0.710424	0.860159	0.789287	0.792832	0.416211	0.425485	0.435843
10	0.728714	0.729212	0.687889	0.817399	0.754529	0.755024	0.39636	0.40289	0.410779
10.0167	0.704179	0.707504	0.666895	0.77873	0.721854	0.722976	0.379665	0.383959	0.389734
10.0333	0.680235	0.686119	0.64716	0.743557	0.691088	0.695489	0.365598	0.368067	0.372033
10.05	0.656923	0.665191	0.628549	0.711411	0.662082	0.671454	0.353738	0.354697	0.357102
10.0667	0.634411	0.644973	0.611044	0.681874	0.634712	0.649966	0.343738	0.343427	0.344473
10.0833	0.612902	0.625732	0.594684	0.654559	0.608877	0.630283	0.33529	0.333897	0.333755
10.1	0.592566	0.60766	0.579502	0.62912	0.584496	0.611863	0.328105	0.32579	0.324613
10.1167	0.573489	0.590825	0.565488	0.605256	0.561492	0.594422	0.32191	0.31882	0.316758
10.1333	0.555667	0.575171	0.552575	0.582704	0.53979	0.577929	0.316456	0.312737	0.309936
10.15	0.539041	0.56056	0.540653	0.561247	0.519325	0.562486	0.311542	0.307338	0.303939
10.1667	0.523522	0.546817	0.529599	0.540725	0.500063	0.548209	0.30702	0.302473	0.298611
10.1833	0.50903	0.53377	0.519299	0.521045	0.482011	0.53513	0.302799	0.298045	0.293846
10.2	0.495509	0.521279	0.50967	0.502175	0.465214	0.523194	0.298831	0.294002	0.289584
10.2167	0.482941	0.509249	0.500661	0.48414	0.449736	0.512294	0.295097	0.290323	0.285796
10.2333	0.471326	0.497617	0.492228	0.466999	0.435632	0.502309	0.291592	0.286997	0.282468
10.25	0.460665	0.486332	0.484308	0.450834	0.422921	0.493106	0.288307	0.284013	0.279584
10.2667	0.450928	0.475328	0.476797	0.435731	0.411579	0.48454	0.285227	0.281346	0.277116
10.2833	0.442033	0.464522	0.46954	0.421762	0.401531	0.476444	0.282321	0.278952	0.275013
10.3	0.433845	0.453828	0.462356	0.408954	0.39265	0.468642	0.279553	0.276775	0.273206
10.3167	0.426191	0.44318	0.455067	0.397277	0.384767	0.460969	0.276892	0.274767	0.271626
10.3333	0.418891	0.432554	0.447526	0.386643	0.377687	0.453294	0.274343	0.27291	0.270232
10.35	0.411784	0.421983	0.439648	0.376924	0.371212	0.445526	0.271967	0.271252	0.269045
10.3667	0.404759	0.411565	0.431426	0.367981	0.365169	0.437629	0.269907	0.269924	0.268174
10.3833	0.397768	0.401457	0.422941	0.359694	0.359434	0.42961	0.268384	0.269141	0.267819
10.4	0.390838	0.391867	0.414354	0.351975	0.35395	0.421505	0.267665	0.269166	0.268234
10.4167	0.38407	0.383027	0.405889	0.344766	0.34874	0.41336	0.267996	0.270239	0.269663
10.4333	0.377624	0.375169	0.397793	0.33803	0.343885	0.405201	0.269519	0.272491	0.272252
10.45	0.371694	0.368493	0.390304	0.331727	0.339506	0.397037	0.272203	0.275874	0.275969
10.4667	0.366477	0.363137	0.383608	0.325793	0.335711	0.388857	0.275809	0.280128	0.280571
10.4833	0.362142	0.359155	0.377801	0.320134	0.332554	0.380657	0.279917	0.284813	0.285625
10.5	0.358785	0.356503	0.372864	0.314634	0.329989	0.372453	0.284005	0.289391	0.29059
10.5167	0.356414	0.355032	0.368666	0.309166	0.327859	0.364296	0.28755	0.293333	0.294928
10.5333	0.354928	0.354514	0.364981	0.303626	0.325903	0.356274	0.290132	0.296224	0.298207
10.55	0.354143	0.354666	0.361528	0.297951	0.323795	0.348495	0.291508	0.297832	0.300178
10.5667	0.353824	0.3552	0.358033	0.292135	0.321208	0.341065	0.291635	0.298142	0.30081
10.5833	0.353732	0.355856	0.354272	0.286217	0.317866	0.334061	0.290669	0.297334	0.300277
10.6	0.35367	0.356438	0.350114	0.280259	0.313597	0.3275	0.28891	0.295739	0.298911
10.6167	0.353501	0.356817	0.345529	0.274309	0.308344	0.321324	0.286734	0.293751	0.297115
10.6333	0.353151	0.356931	0.340571	0.268358	0.30215	0.315398	0.284501	0.29174	0.295273
10.65	0.352583	0.356754	0.335335	0.262304	0.295125	0.30952	0.282474	0.289963	0.293654
10.6667	0.351772	0.35628	0.329919	0.25594	0.287409	0.303443	0.280771	0.288517	0.292363
10.6833	0.350687	0.355497	0.324396	0.24898	0.27915	0.296928	0.279349	0.287334	0.291326
10.7	0.349291	0.354387	0.318806	0.241134	0.270499	0.289794	0.278043	0.286219	0.290343
10.7167	0.347552	0.352933	0.313169	0.232213	0.26161	0.281987	0.27662	0.284914	0.289144
10.7333	0.345454	0.351121	0.307505	0.222218	0.252634	0.273608	0.274836	0.283162	0.287461
10.75	0.342999	0.348947	0.301835	0.211357	0.243706	0.264894	0.27248	0.280745	0.285074
10.7667	0.340196	0.346409	0.296187	0.199995	0.234924	0.256155	0.269388	0.277506	0.281824
10.7833	0.33705	0.3435	0.290585	0.188555	0.226347	0.247692	0.265454	0.27335	0.277621
10.8	0.33355	0.340199	0.28505	0.177421	0.217997	0.239743	0.260632	0.268241	0.272436
10.8167	0.329676	0.336468	0.279602	0.166897	0.209877	0.232466	0.254933	0.262211	0.266305
10.8333	0.325407	0.332249	0.274267	0.157189	0.20199	0.225959	0.248436	0.255352	0.259324
10.85	0.32073	0.327477	0.269083	0.148426	0.194351	0.220286	0.241278	0.247822	0.251651
10.8667	0.31565	0.322086	0.264106	0.14067	0.186986	0.21548	0.233647	0.239822	0.243492
10.8833	0.310187	0.316033	0.2594	0.13392	0.179936	0.211546	0.225759	0.231582	0.23508
10.9	0.304369	0.309304	0.255031	0.128133	0.173242	0.208449	0.217832	0.22333	0.226647
10.9167	0.29823	0.301929	0.251054	0.123223	0.166941	0.20612	0.210063	0.21527	0.218405
10.9333	0.291803	0.293976	0.247504	0.119081	0.161058	0.204459	0.202609	0.207561	0.210518
10.95	0.285113	0.285539	0.244384	0.115586	0.155601	0.203359	0.195576	0.200308	0.203099
10.9667	0.278185	0.276728	0.241669	0.112619	0.150565	0.202707	0.189018	0.19356	0.196203
10.9833	0.27104	0.267651	0.239303	0.110074	0.145933	0.202392	0.182941	0.18732	0.189835
11	0.263695	0.258411	0.23721	0.10786	0.141676	0.202301	0.177319	0.181555	0.183963
11.0167	0.256172	0.249099	0.235293	0.105902	0.137763	0.202324	0.172108	0.176216	0.178536
11.0333	0.248493	0.239801	0.233448	0.104143	0.13416	0.202353	0.167257	0.171248	0.173493
11.05	0.240689	0.230594	0.231569	0.102535	0.130833	0.20229	0.162717	0.166598	0.168779
11.0667	0.2328	0.221552	0.229557	0.101044	0.127748	0.202047	0.158449	0.162222	0.164347
11.0833	0.22488	0.212738	0.227333	0.0996431	0.124875	0.201553	0.154419	0.158085	0.160159
11.1	0.216989	0.204207	0.224834	0.0983142	0.122191	0.200747	0.150599	0.154159	0.156184
11.1167	0.209191	0.195997	0.222019	0.0970448	0.119677	0.19959	0.146967	0.150422	0.152399
11.1333	0.201544	0.188129	0.218866	0.0958278	0.117318	0.198054	0.143503	0.146852	0.148785
11.15	0.19409	0.180601	0.215364	0.0946609	0.115105	0.196129	0.140189	0.143434	0.145324
11.1667	0.186856	0.173394	0.211514	0.0935468	0.11303	0.193815	0.137005	0.140149	0.141997
11.1833	0.179851	0.16647	0.207322	0.0924923	0.111089	0.191116	0.133933	0.136981	0.138789
11.2	0.173068	0.159781	0.202802	0.0915085	0.109277	0.188043	0.130957	0.133911	0.135682
11.2167	0.166486	0.15328	0.197974	0.0906094	0.107593	0.184613	0.128061	0.130926	0.132661
11.2333	0.160078	0.146929	0.192864	0.0898097	0.106039	0.180848	0.125233	0.12801	0.129712
11.25	0.153816	0.1407	0.18751	0.0891233	0.104614	0.176783	0.122459	0.125151	0.12682
11.2667	0.147677	0.13458	0.181956	0.0885606	0.10332	0.172459	0.119729	0.12234	0.123976
11.2833	0.141644	0.128568	0.176253	0.088127	0.102158	0.167926	0.117036	0.119567	0.121172
11.3	0.13571	0.122671	0.170452	0.0878231	0.101127	0.163236	0.114375	0.116827	0.118403
11.3167	0.129875	0.116902	0.164602	0.087645	0.100225	0.158437	0.111742	0.114118	0.115666
11.3333	0.124147	0.111278	0.158746	0.0875856	0.0994463	0.153575	0.109136	0.11144	0.112959
11.35	0.118537	0.105816	0.152921	0.0876361	0.098783	0.148687	0.106561	0.108792	0.110283
11.3667	0.113057	0.100533	0.147155	0.0877861	0.0982258	0.1438	0.104017	0.106179	0.107641
11.3833	0.107721	0.0954432	0.141472	0.0880248	0.0977631	0.138935	0.101511	0.103604	0.105036
11.4	0.102542	0.0905544	0.135887	0.0883408	0.0973813	0.1341	0.0990468	0.101071	0.102473
11.4167	0.0975315	0.0858729	0.13041	0.0887221	0.0970656	0.129302	0.0966296	0.0985857	0.0999571
11.4333	0.0926991	0.0814042	0.125049	0.089155	0.0968005	0.124543	0.0942634	0.0961501	0.0974911
11.45	0.0880521	0.0771514	0.119806	0.0896248	0.0965712	0.119825	0.0919522	0.0937681	0.0950789
11.4667	0.0835959	0.0731147	0.114683	0.0901153	0.0963626	0.115151	0.0896993	0.0914443	0.0927245
11.4833	0.0793338	0.0692912	0.109682	0.0906091	0.0961598	0.110523	0.0875076	0.0891827	0.0904317
11.5	0.0752672	0.0656751	0.104805	0.0910882	0.0959473	0.105945	0.0853797	0.0869866	0.0882046
11.5167	0.0713943	0.0622597	0.100052	0.0915341	0.09571	0.101421	0.0833176	0.084859	0.0860463
11.5333	0.0677127	0.0590387	0.0954267	0.0919269	0.0954331	0.0969563	0.0813228	0.082801	0.0839594
11.55	0.0642177	0.0560049	0.0909333	0.0922471	0.0951018	0.0925602	0.0793961	0.0808138	0.0819459
11.5667	0.0609036	0.05315	0.0865759	0.092476	0.0947017	0.0882407	0.0775389	0.078899	0.0800079
11.5833	0.057764	0.0504654	0.0823594	0.0925967	0.0942178	0.0840061	0.075752	0.0770581	0.0781461
11.6	0.054792	0.0479424	0.0782887	0.0925939	0.093636	0.0798651	0.0740368	0.0752927	0.0763609
11.6167	0.0519807	0.0455722	0.0743675	0.0924554	0.0929424	0.0758263	0.0723944	0.073604	0.074653
11.6333	0.0493236	0.0433473	0.0705996	0.0921693	0.0921252	0.0718987	0.0708262	0.0719927	0.0730232
11.65	0.0468146	0.0412597	0.0669878	0.091726	0.0911749	0.0680926	0.0693335	0.0704589	0.0714727
11.6667	0.0444479	0.0393011	0.0635342	0.0911173	0.0900836	0.0644174	0.0679178	0.069004	0.0700032
11.6833	0.0422186	0.0374635	0.0602398	0.0903367	0.0888454	0.0608811	0.0665809	0.06763	0.0686159
11.7	0.0401214	0.035739	0.0571048	0.0893799	0.0874566	0.0574894	0.0653236	0.066338	0.0673112
11.7167	0.0381499	0.0341195	0.0541272	0.0882441	0.0859155	0.0542454	0.0641466	0.0651289	0.0660894
11.7333	0.0362976	0.0325979	0.0513041	0.0869275	0.0842228	0.0511506	0.0630494	0.0640023	0.0649509
11.75	0.0345581	0.0311684	0.0486318	0.0854302	0.0823816	0.0482055	0.0620314	0.0629569	0.0638949
11.7667	0.0329251	0.0298254	0.0461061	0.0837537	0.080397	0.0454098	0.0610912	0.061991	0.06292
11.7833	0.0313932	0.0285651	0.043722	0.0819015	0.0782758	0.0427612	0.0602269	0.0611024	0.062024
11.8	0.0299571	0.0273838	0.0414743	0.0798794	0.0760273	0.0402567	0.0594348	0.0602878	0.0612034
11.8167	0.0286105	0.0262781	0.0393565	0.0776966	0.0736632	0.037892	0.0587107	0.0595438	0.060455
11.8333	0.027347	0.0252453	0.0373625	0.0753641	0.0711969	0.0356616	0.0580498	0.0588662	0.0597743
11.85	0.0261613	0.0242824	0.0354857	0.0728963	0.0686439	0.0335603	0.0574467	0.0582497	0.0591558
11.8667	0.0250481	0.0233862	0.0337195	0.0703091	0.0660205	0.0315827	0.0568965	0.0576884	0.0585934
11.8833	0.0240032	0.0225528	0.032057	0.0676195	0.0633443	0.0297236	0.0563938	0.0571765	0.0580814
11.9	0.0230224	0.021778	0.030492	0.0648461	0.0606331	0.0279778	0.0559331	0.0567079	0.0576138
11.9167	0.0221012	0.0210564	0.0290186	0.0620097	0.0579055	0.0263398	0.0555087	0.0562767	0.0571851
11.9333	0.021236	0.0203827	0.027631	0.0591316	0.0551793	0.0248039	0.0551147	0.0558773	0.0567892
11.95	0.0204231	0.0197519	0.0263239	0.0562327	0.0524717	0.0233646	0.0547455	0.0555042	0.0564207
11.9667	0.0196593	0.0191589	0.0250918	0.0533334	0.0497991	0.0220165	0.0543961	0.0551524	0.056074
11.9833	0.0189411	0.0185987	0.0239299	0.0504527	0.0471763	0.0207541	0.0540617	0.0548173	0.0557447
12	0.0182649	0.0180667	0.0228343	0.0476089	0.0446175	0.0195723	0.0537383	0.0544942	0.0554285
12.0167	0.0176278	0.017559	0.0218018	0.0448201	0.0421353	0.0184657	0.0534226	0.0541792	0.0551214
12.0333	0.0170273	0.0170726	0.0208294	0.0421025	0.0397405	0.0174297	0.0531111	0.0538686	0.0548194
12.05	0.0164608	0.0166049	0.0199142	0.0394701	0.0374418	0.0164602	0.0528008	0.0535594	0.0545183
12.0667	0.0159267	0.0161534	0.0190537	0.0369347	0.0352451	0.0155533	0.0524888	0.0532487	0.0542146
12.0833	0.0154234	0.0157159	0.0182451	0.0345057	0.0331543	0.0147056	0.0521724	0.0529345	0.0539053
12.1	0.01495	0.0152902	0.0174856	0.0321907	0.0311715	0.013914	0.0518495	0.0526143	0.0535882
12.1167	0.0145057	0.0148747	0.0167726	0.0299955	0.0292982	0.0131756	0.0515187	0.0522865	0.0532621
12.1333	0.0140896	0.0144683	0.0161033	0.0279235	0.0275338	0.0124874	0.051179	0.0519498	0.052926
12.15	0.0137002	0.0140702	0.0154756	0.0259759	0.025877	0.0118467	0.0508299	0.0516036	0.052579
12.1667	0.0133355	0.01368	0.0148869	0.0241515	0.0243243	0.011251	0.0504721	0.0512478	0.0522209
12.1833	0.012993	0.0132977	0.0143349	0.0224478	0.0228719	0.0106973	0.0501063	0.0508829	0.0518518
12.2	0.0126701	0.0129243	0.0138169	0.0208615	0.0215151	0.0101836	0.0497337	0.0505095	0.0514727
12.2167	0.0123639	0.0125608	0.0133312	0.0193894	0.0202494	0.00970836	0.0493551	0.0501285	0.0510848
12.2333	0.012072	0.0122086	0.0128761	0.0180274	0.0190698	0.00926974	0.0489711	0.0497408	0.0506889
12.25	0.0117922	0.011869	0.0124506	0.0167704	0.017971	0.00886655	0.0485815	0.0493467	0.0502855
12.2667	0.0115229	0.0115434	0.0120535	0.0156129	0.0169475	0.0084972	0.0481863	0.0489465	0.0498746
12.2833	0.0112629	0.0112336	0.0116834	0.0145487	0.0159936	0.00816036	0.0477847	0.0485397	0.0494561
12.3	0.0110126	0.0109419	0.0113392	0.0135715	0.0151042	0.0078543	0.0473762	0.0481255	0.0490296
12.3167	0.0107738	0.0106705	0.0110197	0.0126751	0.0142746	0.00757723	0.0469596	0.0477021	0.048594
12.3333	0.0105484	0.0104207	0.0107236	0.0118532	0.0135003	0.00732759	0.0465337	0.0472681	0.0481481
12.35	0.010339	0.0101932	0.0104497	0.0110997	0.0127778	0.00710383	0.0460972	0.0468223	0.0476903
12.3667	0.0101473	0.00998675	0.0101966	0.0104089	0.0121035	0.00690427	0.045649	0.0463635	0.0472198
12.3833	0.00997471	0.00979945	0.00996262	0.00977506	0.011474	0.00672658	0.0451894	0.045892	0.0467363
12.4	0.00982181	0.00962788	0.00974582	0.00919248	0.0108862	0.00656832	0.0447192	0.0454084	0.0462404
12.4167	0.00968832	0.00946824	0.00954426	0.0086559	0.0103372	0.00642682	0.0442395	0.0449138	0.0457329
12.4333	0.00957273	0.00931656	0.00935656	0.00816056	0.00982426	0.00629953	0.0437519	0.0444102	0.0452156
12.45	0.00947217	0.0091695	0.00918115	0.00770289	0.0093453	0.00618385	0.0432578	0.0438991	0.0446905
12.4667	0.00938269	0.00902368	0.00901681	0.00728003	0.00889829	0.00607791	0.0427584	0.0433828	0.0441597
12.4833	0.00929922	0.00887687	0.00886189	0.00688967	0.00848152	0.00597959	0.0422556	0.0428632	0.0436252
12.5	0.00921701	0.00872757	0.00871557	0.00652928	0.00809325	0.0058879	0.0417509	0.0423425	0.0430887
12.5167	0.00913171	0.00857517	0.0085776	0.00619673	0.00773174	0.00580185	0.0412462	0.041822	0.0425513
12.5333	0.00903999	0.00841982	0.00844876	0.00589003	0.00739557	0.00572103	0.0407436	0.041303	0.0420144
12.55	0.00893925	0.00826253	0.00833033	0.00560762	0.00708331	0.00564526	0.0402446	0.0407863	0.0414801
12.5667	0.00882827	0.00810537	0.00822371	0.00534813	0.00679358	0.00557507	0.0397502	0.0402731	0.0409497
12.5833	0.0087067	0.00795063	0.00813001	0.00511035	0.00652512	0.00551134	0.039261	0.0397646	0.0404249
12.6	0.00857509	0.00780024	0.00804983	0.00489299	0.00627617	0.00545469	0.0387772	0.0392621	0.0399068
12.6167	0.00843457	0.00765573	0.00798362	0.00469469	0.00604547	0.0054056	0.038299	0.0387662	0.0393961
12.6333	0.00828625	0.00751709	0.00793151	0.00451428	0.00583171	0.00536419	0.0378273	0.0382774	0.0388936
12.65	0.00813073	0.00738277	0.00789293	0.00435037	0.00563375	0.00533035	0.0373633	0.0377966	0.0384
12.6667	0.00796846	0.00725054	0.00786668	0.00420153	0.0054504	0.00530358	0.036908	0.0373244	0.0379157
12.6833	0.00779952	0.00711655	0.00785054	0.00406639	0.0052806	0.0052831	0.036462	0.0368614	0.0374407
12.7	0.00762397	0.00697705	0.00784184	0.00394377	0.00512329	0.00526763	0.0360249	0.0364078	0.0369748
12.7167	0.00744189	0.00682802	0.00783712	0.00383281	0.0049776	0.00525575	0.0355962	0.0359631	0.0365179
12.7333	0.00725306	0.00666637	0.00783263	0.00373294	0.00484253	0.00524567	0.0351753	0.0355272	0.0360698
12.75	0.00705749	0.0064903	0.00782486	0.00364363	0.0047172	0.0052352	0.0347621	0.0350998	0.0356301
12.7667	0.00685529	0.00629913	0.00781056	0.00356404	0.00460082	0.00522161	0.0343562	0.0346808	0.0351986
12.7833	0.00664722	0.00609326	0.00778719	0.00349335	0.00449287	0.00520242	0.0339571	0.0342693	0.0347749
12.8	0.00643386	0.00587403	0.00775295	0.00343074	0.00439304	0.00517526	0.0335642	0.0338652	0.034359
12.8167	0.0062164	0.00564341	0.00770696	0.00337624	0.00430101	0.005138	0.0331774	0.0334676	0.0339506
12.8333	0.00599576	0.00540406	0.00764879	0.00332968	0.00421606	0.0050891	0.0327968	0.0330762	0.0335497
12.85	0.00577272	0.00515909	0.00757934	0.00329079	0.00413746	0.00502709	0.0324221	0.0326907	0.0331561
12.8667	0.00554861	0.00491125	0.00749925	0.00325877	0.00406469	0.0049517	0.0320527	0.0323112	0.0327696
12.8833	0.0053249	0.0046631	0.00740946	0.00323214	0.00399712	0.00486305	0.0316888	0.0319378	0.0323901
12.9	0.00510312	0.00441694	0.007311	0.00320901	0.00393454	0.00476218	0.031331	0.0315708	0.0320177
12.9167	0.00488478	0.00417466	0.00720483	0.00318786	0.00387641	0.00464993	0.0309805	0.0312113	0.0316526
12.9333	0.00467101	0.00393803	0.00709218	0.00316736	0.00382234	0.00452788	0.0306376	0.0308599	0.0312945
12.95	0.00446273	0.00370814	0.00697406	0.00314669	0.00377206	0.0043973	0.030302	0.0305171	0.0309435
12.9667	0.00426074	0.00348622	0.0068514	0.00312471	0.00372537	0.00425976	0.0299734	0.0301823	0.0306001
12.9833	0.00406581	0.00327331	0.00672506	0.00310056	0.00368208	0.00411647	0.0296513	0.0298547	0.0302648
13	0.00387796	0.00307023	0.00659593	0.00307323	0.0036419	0.00396834	0.029337	0.0295342	0.029938
13.0167	0.00369741	0.00287709	0.0064649	0.00304279	0.00360459	0.0038164	0.0290309	0.0292218	0.02962
13.0333	0.00352377	0.00269353	0.00633291	0.0030095	0.00357021	0.00366223	0.0287339	0.0289182	0.0293107
13.05	0.00335687	0.00251924	0.00620042	0.00297441	0.00353864	0.00350769	0.028446	0.0286243	0.0290103
13.0667	0.00319687	0.00235383	0.00606779	0.00293822	0.0035096	0.00335425	0.0281678	0.0283405	0.0287193
13.0833	0.00304352	0.00219695	0.00593551	0.00290191	0.00348297	0.00320314	0.0278999	0.0280669	0.0284381
13.1	0.00289634	0.00204858	0.00580424	0.00286583	0.00345839	0.00305563	0.027643	0.0278039	0.0281675
13.1167	0.00275487	0.00190827	0.00567485	0.00283019	0.00343569	0.0029121	0.027397	0.0275524	0.0279082
13.1333	0.00261861	0.00177545	0.00554754	0.00279543	0.00341507	0.00277322	0.027162	0.0273127	0.0276606
13.15	0.00248727	0.00164999	0.00542215	0.00276186	0.00339652	0.00263944	0.0269383	0.0270851	0.027425
13.1667	0.00236093	0.0015315	0.00529798	0.00272998	0.00338002	0.00251113	0.026726	0.0268697	0.0272012
13.1833	0.00223938	0.00142011	0.00517422	0.00269968	0.0033656	0.00238853	0.026525	0.0266658	0.0269888
13.2	0.00212284	0.00131611	0.00504965	0.00267114	0.00335308	0.00227159	0.0263345	0.0264727	0.0267867
13.2167	0.00201122	0.00122027	0.00492388	0.00264463	0.00334231	0.00215939	0.0261537	0.0262894	0.0265937
13.2333	0.00190471	0.00113301	0.00479683	0.00262074	0.00333356	0.00205105	0.0259815	0.0261146	0.0264078
13.25	0.0018042	0.001055	0.00466887	0.00260016	0.00332702	0.00194567	0.0258164	0.0259472	0.0262275
13.2667	0.00171088	0.000986904	0.00454134	0.00258321	0.00332333	0.00184355	0.0256563	0.0257852	0.0260513
13.2833	0.00162615	0.000929207	0.00441521	0.00256998	0.00332283	0.00174542	0.0254989	0.0256266	0.0258779
13.3	0.00155057	0.000881904	0.0042915	0.00256054	0.00332566	0.00165165	0.0253419	0.0254692	0.0257062
13.3167	0.001484	0.000843757	0.00417098	0.0025556	0.0033317	0.00156203	0.0251836	0.0253117	0.0255343
13.3333	0.00142549	0.000812882	0.00405361	0.00255587	0.00334157	0.00147582	0.0250229	0.0251526	0.0253604
13.35	0.00137368	0.000786871	0.00393893	0.00256206	0.0033563	0.00139204	0.024859	0.0249906	0.0251836
13.3667	0.00132667	0.000762481	0.00382561	0.00257451	0.00337726	0.00130926	0.0246919	0.0248247	0.025003
13.3833	0.0012818	0.000736946	0.00371188	0.00259346	0.00340556	0.00122617	0.0245214	0.0246552	0.0248196
13.4	0.00123605	0.000707215	0.00359539	0.00261897	0.00344149	0.00114098	0.0243479	0.0244829	0.0246342
13.4167	0.00118603	0.000670594	0.00347384	0.00265099	0.00348443	0.00105212	0.0241724	0.0243095	0.0244484
13.4333	0.00112859	0.000624722	0.00334483	0.0026889	0.00353297	0.000957662	0.0239971	0.0241366	0.0242628
13.45	0.00106131	0.000567716	0.00320667	0.00273072	0.00358545	0.000856429	0.0238241	0.0239664	0.0240794
13.4667	0.000983083	0.000498217	0.00305861	0.00277364	0.00363933	0.000747663	0.023656	0.0238002	0.0239005
13.4833	0.000893772	0.000416344	0.00290106	0.0028145	0.00369209	0.000631267	0.0234943	0.0236396	0.0237288
13.5	0.000794184	0.00032329	0.00273539	0.00285007	0.00374035	0.000507623	0.0233403	0.0234863	0.0235668
13.5167	0.000685799	0.00022108	0.00256389	0.00287754	0.00378054	0.000377709	0.0231953	0.0233421	0.0234159
13.5333	0.000570118	0.00011217	0.00238887	0.00289444	0.00380904	0.000243431	0.0230607	0.0232088	0.0232773
13.55	0.00044924	-1.03116e-06	0.00221289	0.00289828	0.00382336	0.000107127	0.0229377	0.0230874	0.0231516
13.5667	0.000325143	-0.000116068	0.00203766	0.00288774	0.00382189	-2.87235e-05	0.0228275	0.0229788	0.0230393
13.5833	0.000199854	-0.0002312	0.00186502	0.00286247	0.00380443	-0.000162357	0.0227302	0.022883	0.0229406
13.6	7.51615e-05	-0.000344807	0.00169605	0.00282318	0.00377137	-0.000292605	0.0226454	0.0228002	0.0228553
13.6167	-4.70996e-05	-0.000455528	0.00153178	0.00277125	0.00372375	-0.000418276	0.0225728	0.0227301	0.0227833
13.6333	-0.00016619	-0.00056265	0.00137237	0.00270798	0.00366319	-0.000538748	0.0225117	0.0226724	0.0227245
13.65	-0.000281417	-0.000665337	0.00121826	0.00263511	0.0035916	-0.000653714	0.0224617	0.0226265	0.0226783
13.6667	-0.00039233	-0.000763303	0.00106927	0.00255479	0.0035113	-0.000763148	0.0224228	0.0225918	0.0226445
13.6833	-0.000498927	-0.000856477	0.000925505	0.00246903	0.00342449	-0.000867361	0.0223947	0.0225678	0.0226227
13.7	-0.000601113	-0.000944668	0.000786555	0.00237982	0.00333272	-0.000966829	0.0223776	0.0225544	0.0226119
13.7167	-0.000698459	-0.00102792	0.000651872	0.0022886	0.00323745	-0.00106174	0.0223707	0.0225513	0.0226119
13.7333	-0.000790966	-0.00110646	0.00052098	0.0021965	0.00313958	-0.00115239	0.0223733	0.0225579	0.0226222
13.75	-0.00087868	-0.00118063	0.000393331	0.00210442	0.00304066	-0.0012392	0.0223845	0.0225734	0.0226421
13.7667	-0.000961626	-0.00125058	0.000268877	0.00201339	0.00294138	-0.00132245	0.0224034	0.022597	0.0226712
13.7833	-0.00103995	-0.00131684	0.000147402	0.00192406	0.00284229	-0.00140261	0.0224287	0.0226281	0.0227083
13.8	-0.00111395	-0.00137959	2.9242e-05	0.00183682	0.00274323	-0.00147983	0.02246	0.0226665	0.0227529
13.8167	-0.00118436	-0.001439	-8.54135e-05	0.00175137	0.00264417	-0.00155427	0.0224967	0.0227114	0.022804
13.8333	-0.00125185	-0.00149537	-0.000196016	0.00166776	0.00254573	-0.00162591	0.0225389	0.022762	0.0228615
13.85	-0.00131677	-0.00154906	-0.000302732	0.00158641	0.00244797	-0.00169498	0.022587	0.0228173	0.0229247
13.8667	-0.00137926	-0.0016007	-0.000406039	0.00150773	0.00235122	-0.00176167	0.0226402	0.0228769	0.0229928
13.8833	-0.00143918	-0.00165065	-0.000506437	0.00143184	0.00225557	-0.00182597	0.0226976	0.0229401	0.0230649
13.9	-0.00149654	-0.00169943	-0.000604165	0.00135879	0.00216104	-0.0018877	0.0227579	0.0230069	0.0231399
13.9167	-0.0015519	-0.00174671	-0.000698364	0.00128803	0.00206777	-0.00194692	0.0228202	0.0230771	0.0232173
13.9333	-0.00160536	-0.00179248	-0.000788772	0.00121936	0.00197605	-0.00200357	0.0228839	0.02315	0.0232968
13.95	-0.0016569	-0.0018364	-0.000874937	0.00115289	0.00188559	-0.00205759	0.0229488	0.023225	0.0233782
13.9667	-0.00170647	-0.00187851	-0.000957	0.00108835	0.00179604	-0.00210904	0.023015	0.0233016	0.0234604
13.9833	-0.00175403	-0.00191897	-0.00103549	0.00102536	0.00170704	-0.00215773	0.0230825	0.0233793	0.0235428
14	-0.00179971	-0.00195802	-0.00111109	0.000963849	0.00161837	-0.00220417	0.0231512	0.0234577	0.0236246
14.0167							0.0232209	0.0235364	0.0237059
14.0333							0.0232911	0.0236151	0.0237871
14.05							0.0233614	0.0236937	0.0238692
14.0667							0.0234319	0.0237726	0.0239525
14.0833							0.023503	0.0238526	0.0240378
14.1							0.0235753	0.0239343	0.0241252
14.1167							0.0236496	0.0240185	0.0242146
14.1333							0.0237268	0.0241061	0.0243062
14.15							0.023808	0.0241983	0.0244003
14.1667							0.0238949	0.0242964	0.0244979
14.1833							0.023989	0.0244014	0.0246003
14.2							0.0240923	0.0245148	0.02471
14.2167							0.0242063	0.0246386	0.0248293
14.2333							0.0243332	0.0247748	0.0249608
14.25							0.0244747	0.024926	0.0251071
14.2667							0.024632	0.0250939	0.0252706
14.2833							0.0248062	0.0252792	0.0254525
14.3							0.0249982	0.0254823	0.0256533
14.3167							0.0252074	0.0257026	0.0258725
14.3333							0.0254321	0.0259377	0.026108
14.35							0.0256689	0.0261842	0.0263576
14.3667							0.0259121	0.0264369	0.0266166
14.3833							0.0261545	0.0266892	0.0268789
14.4							0.0263874	0.0269328	0.027136
14.4167							0.0266007	0.0271576	0.0273777
14.4333							0.0267835	0.0273528	0.0275927
14.45							0.0269247	0.0275071	0.0277695
14.4667							0.0270131	0.0276095	0.0278967
14.4833							0.0270391	0.0276494	0.0279631
14.5							0.0269939	0.0276176	0.0279584
14.5167							0.0268696	0.0275059	0.0278736
14.5333							0.0266599	0.0273082	0.0277014
14.55							0.0263602	0.0270198	0.0274365
14.5667							0.0259676	0.0266371	0.0270757
14.5833							0.0254807	0.0261578	0.0266172
14.6							0.0248987	0.0255811	0.0260613
14.6167							0.0242216	0.0249079	0.0254087
14.6333							0.0234498	0.0241392	0.0246602
14.65							0.0225841	0.0232763	0.0238168
14.6667							0.0216261	0.0223198	0.0228792
14.6833							0.0205782	0.0212712	0.0218491
14.7							0.0194455	0.0201348	0.0207306
14.7167							0.0182371	0.0189198	0.0195314
14.7333							0.016969	0.0176418	0.0182645
14.75							0.0156651	0.0163246	0.0169506
14.7667							0.0143574	0.0149995	0.0156179
14.7833							0.0130837	0.0137029	0.0143014
14.8							0.0118815	0.0124721	0.0130389
14.8167							0.0107827	0.0113401	0.0118651
14.8333							0.00980848	0.0103297	0.0108064
14.85							0.00896743	0.00945197	0.00987768
14.8667							0.00825681	0.00870606	0.00908101
14.8833							0.00766548	0.00808207	0.00840902
14.9							0.0071771	0.00756491	0.00784748
14.9167							0.00677434	0.00713707	0.0073801
14.9333							0.00644084	0.0067819	0.00699027
14.95							0.00616285	0.00648509	0.00666316
14.9667							0.00592903	0.00623463	0.00638623
14.9833							0.0057304	0.00602111	0.00614948
15							0.00555929	0.00583633	0.00594473

## Sheet: Figure2
m/z	AP	APG
20.0019	8	6
20.0035	12	5
20.0052	9	6
20.0068	3	12
20.0085	13	9
20.0101	6	7
20.0118	12	10
20.0134	15	5
20.0151	6	9
20.0167	6	10
20.0184	9	7
20.02	11	7
20.0217	4	6
20.0233	8	8
20.0249	6	8
20.0266	4	6
20.0282	7	11
20.0299	5	10
20.0315	6	8
20.0332	6	8
20.0348	2	7
20.0365	6	7
20.0381	9	10
20.0398	12	5
20.0414	14	5
20.0431	8	4
20.0447	6	2
20.0464	10	9
20.048	10	9
20.0497	6	7
20.0513	7	7
20.053	8	5
20.0546	5	7
20.0563	9	12
20.0579	7	5
20.0596	6	3
20.0612	11	10
20.0629	13	3
20.0645	3	5
20.0662	6	4
20.0678	6	4
20.0695	9	9
20.0711	8	11
20.0728	7	5
20.0744	7	8
20.0761	11	6
20.0777	5	6
20.0794	5	5
20.081	11	6
20.0827	8	6
20.0843	9	4
20.086	7	4
20.0876	8	4
20.0893	6	10
20.0909	8	4
20.0926	4	5
20.0942	10	7
20.0959	4	9
20.0975	9	6
20.0992	11	7
20.1008	13	5
20.1025	11	4
20.1041	3	4
20.1058	7	5
20.1074	7	5
20.1091	4	2
20.1107	5	5
20.1124	7	10
20.114	5	6
20.1157	3	6
20.1173	4	6
20.119	7	4
20.1206	4	2
20.1223	8	5
20.1239	9	3
20.1256	6	6
20.1273	9	10
20.1289	6	5
20.1306	11	5
20.1322	6	4
20.1339	3	8
20.1355	4	5
20.1372	6	8
20.1388	2	11
20.1405	9	4
20.1421	4	7
20.1438	10	9
20.1454	9	8
20.1471	3	9
20.1487	5	3
20.1504	4	8
20.152	7	9
20.1537	1	4
20.1553	10	3
20.157	4	14
20.1587	3	8
20.1603	7	5
20.162	8	9
20.1636	10	6
20.1653	10	7
20.1669	11	3
20.1686	4	7
20.1702	5	6
20.1719	9	8
20.1735	7	4
20.1752	10	16
20.1768	8	9
20.1785	8	8
20.1802	6	6
20.1818	8	4
20.1835	8	6
20.1851	7	5
20.1868	6	6
20.1884	9	4
20.1901	8	7
20.1917	2	10
20.1934	8	7
20.195	9	5
20.1967	7	15
20.1984	5	3
20.2	8	8
20.2017	12	6
20.2033	7	11
20.205	8	5
20.2066	6	9
20.2083	10	9
20.2099	5	7
20.2116	7	5
20.2133	5	4
20.2149	6	5
20.2166	8	11
20.2182	6	8
20.2199	1	4
20.2215	13	8
20.2232	6	6
20.2248	7	9
20.2265	4	10
20.2282	6	6
20.2298	8	5
20.2315	5	9
20.2331	11	5
20.2348	6	7
20.2364	3	9
20.2381	9	10
20.2398	9	10
20.2414	6	8
20.2431	7	10
20.2447	10	4
20.2464	9	8
20.248	5	7
20.2497	11	7
20.2514	7	7
20.253	7	5
20.2547	6	9
20.2563	8	11
20.258	10	6
20.2596	7	2
20.2613	11	3
20.263	8	4
20.2646	10	10
20.2663	5	6
20.2679	6	11
20.2696	7	4
20.2712	7	1
20.2729	6	4
20.2746	5	4
20.2762	10	7
20.2779	10	6
20.2795	8	6
20.2812	6	4
20.2829	11	7
20.2845	4	10
20.2862	5	8
20.2878	11	5
20.2895	1	6
20.2911	7	6
20.2928	8	8
20.2945	6	4
20.2961	10	5
20.2978	5	3
20.2994	8	4
20.3011	11	5
20.3028	8	3
20.3044	6	8
20.3061	10	8
20.3077	5	6
20.3094	8	4
20.3111	6	5
20.3127	3	3
20.3144	13	6
20.316	8	13
20.3177	9	8
20.3194	10	3
20.321	7	5
20.3227	6	5
20.3243	2	4
20.326	10	7
20.3277	10	11
20.3293	5	8
20.331	6	12
20.3326	5	7
20.3343	6	5
20.336	16	4
20.3376	8	5
20.3393	7	7
20.3409	2	9
20.3426	8	7
20.3443	6	8
20.3459	11	6
20.3476	4	3
20.3492	6	6
20.3509	5	4
20.3526	5	4
20.3542	4	7
20.3559	7	5
20.3576	7	5
20.3592	4	4
20.3609	8	4
20.3625	6	6
20.3642	9	5
20.3659	8	5
20.3675	6	6
20.3692	4	9
20.3708	4	7
20.3725	5	8
20.3742	9	4
20.3758	6	8
20.3775	5	7
20.3792	8	8
20.3808	5	13
20.3825	6	8
20.3841	8	5
20.3858	7	6
20.3875	7	11
20.3891	13	3
20.3908	3	6
20.3925	5	6
20.3941	6	6
20.3958	13	6
20.3975	8	4
20.3991	9	9
20.4008	9	9
20.4024	7	5
20.4041	6	7
20.4058	13	4
20.4074	11	11
20.4091	12	8
20.4108	3	6
20.4124	1	6
20.4141	6	6
20.4158	7	7
20.4174	5	9
20.4191	10	9
20.4207	7	6
20.4224	7	6
20.4241	9	4
20.4257	6	10
20.4274	11	7
20.4291	9	1
20.4307	6	7
20.4324	10	9
20.4341	7	6
20.4357	5	3
20.4374	9	5
20.4391	5	8
20.4407	8	8
20.4424	8	6
20.444	5	8
20.4457	4	13
20.4474	5	7
20.449	7	14
20.4507	7	5
20.4524	9	2
20.454	6	3
20.4557	4	3
20.4574	7	4
20.459	6	8
20.4607	8	7
20.4624	8	4
20.464	11	4
20.4657	6	3
20.4674	3	6
20.469	5	5
20.4707	5	2
20.4724	9	4
20.474	7	7
20.4757	7	9
20.4774	13	8
20.479	6	7
20.4807	14	7
20.4824	10	6
20.484	9	5
20.4857	9	6
20.4874	10	5
20.489	9	10
20.4907	7	11
20.4924	4	5
20.494	10	7
20.4957	3	7
20.4974	9	10
20.499	6	8
20.5007	6	5
20.5024	8	7
20.504	8	10
20.5057	6	7
20.5074	6	3
20.509	9	7
20.5107	8	3
20.5124	2	3
20.514	4	7
20.5157	5	9
20.5174	8	4
20.519	4	9
20.5207	14	8
20.5224	7	3
20.5241	3	9
20.5257	8	11
20.5274	7	5
20.5291	11	4
20.5307	4	5
20.5324	9	7
20.5341	4	5
20.5357	6	9
20.5374	7	4
20.5391	8	8
20.5407	8	8
20.5424	11	4
20.5441	8	8
20.5457	8	12
20.5474	8	9
20.5491	10	4
20.5508	9	10
20.5524	12	13
20.5541	7	9
20.5558	6	10
20.5574	8	10
20.5591	9	12
20.5608	6	9
20.5624	4	9
20.5641	11	5
20.5658	7	9
20.5675	10	8
20.5691	4	2
20.5708	8	3
20.5725	10	5
20.5741	5	9
20.5758	8	13
20.5775	12	5
20.5791	12	7
20.5808	8	2
20.5825	16	8
20.5842	11	10
20.5858	10	4
20.5875	3	5
20.5892	7	5
20.5908	7	5
20.5925	7	2
20.5942	10	4
20.5959	7	6
20.5975	6	6
20.5992	9	8
20.6009	6	5
20.6025	4	7
20.6042	4	5
20.6059	7	10
20.6076	4	8
20.6092	5	9
20.6109	7	5
20.6126	9	2
20.6142	7	8
20.6159	11	2
20.6176	8	4
20.6193	9	3
20.6209	12	5
20.6226	9	7
20.6243	4	6
20.6259	15	12
20.6276	9	7
20.6293	10	20
20.631	7	10
20.6326	7	8
20.6343	12	4
20.636	2	8
20.6377	11	3
20.6393	4	5
20.641	7	5
20.6427	8	4
20.6443	7	4
20.646	7	8
20.6477	10	6
20.6494	7	5
20.651	8	4
20.6527	5	6
20.6544	5	4
20.6561	12	7
20.6577	14	8
20.6594	11	4
20.6611	10	5
20.6628	2	5
20.6644	4	5
20.6661	11	7
20.6678	8	6
20.6695	8	2
20.6711	12	5
20.6728	7	7
20.6745	6	14
20.6762	7	11
20.6778	9	6
20.6795	15	4
20.6812	10	9
20.6828	4	8
20.6845	8	11
20.6862	10	12
20.6879	13	10
20.6895	10	3
20.6912	6	1
20.6929	3	5
20.6946	12	7
20.6963	11	8
20.6979	7	4
20.6996	8	8
20.7013	7	6
20.703	6	8
20.7046	8	11
20.7063	3	4
20.708	10	5
20.7097	10	6
20.7113	11	1
20.713	15	6
20.7147	8	2
20.7164	7	5
20.718	9	11
20.7197	8	6
20.7214	13	7
20.7231	4	11
20.7247	5	10
20.7264	5	5
20.7281	8	7
20.7298	4	10
20.7314	9	6
20.7331	10	9
20.7348	8	8
20.7365	7	5
20.7382	8	4
20.7398	5	6
20.7415	7	9
20.7432	7	3
20.7449	10	4
20.7465	8	7
20.7482	6	7
20.7499	9	10
20.7516	6	8
20.7533	9	8
20.7549	6	10
20.7566	8	6
20.7583	10	3
20.76	5	7
20.7616	17	8
20.7633	8	9
20.765	7	5
20.7667	13	7
20.7684	11	10
20.77	15	9
20.7717	5	10
20.7734	9	3
20.7751	10	9
20.7767	10	5
20.7784	12	8
20.7801	9	5
20.7818	7	4
20.7835	5	7
20.7851	10	4
20.7868	6	4
20.7885	6	7
20.7902	5	6
20.7919	6	7
20.7935	10	5
20.7952	9	7
20.7969	8	4
20.7986	9	9
20.8003	12	13
20.8019	8	3
20.8036	4	12
20.8053	8	9
20.807	4	9
20.8087	8	9
20.8103	5	6
20.812	0	3
20.8137	6	6
20.8154	9	5
20.8171	8	8
20.8187	7	6
20.8204	12	4
20.8221	9	6
20.8238	7	6
20.8255	7	6
20.8271	4	4
20.8288	2	6
20.8305	5	5
20.8322	6	9
20.8339	6	3
20.8355	11	9
20.8372	6	3
20.8389	7	6
20.8406	1	3
20.8423	8	3
20.8439	4	7
20.8456	7	6
20.8473	7	7
20.849	3	8
20.8507	5	8
20.8523	6	9
20.854	7	13
20.8557	10	6
20.8574	10	10
20.8591	9	7
20.8608	7	5
20.8624	14	10
20.8641	7	7
20.8658	12	9
20.8675	7	5
20.8692	9	6
20.8709	9	10
20.8725	6	5
20.8742	11	10
20.8759	11	9
20.8776	8	5
20.8793	6	8
20.8809	10	3
20.8826	10	3
20.8843	12	7
20.886	7	8
20.8877	7	8
20.8894	7	6
20.891	6	9
20.8927	11	8
20.8944	8	8
20.8961	6	10
20.8978	7	4
20.8995	4	5
20.9011	10	5
20.9028	5	10
20.9045	4	10
20.9062	11	10
20.9079	9	7
20.9096	7	4
20.9112	11	8
20.9129	7	7
20.9146	8	8
20.9163	5	2
20.918	7	5
20.9197	7	8
20.9214	5	3
20.923	3	6
20.9247	6	5
20.9264	9	4
20.9281	8	9
20.9298	6	5
20.9315	12	5
20.9331	4	3
20.9348	7	8
20.9365	5	6
20.9382	11	5
20.9399	11	7
20.9416	8	9
20.9433	8	6
20.9449	7	11
20.9466	8	8
20.9483	4	6
20.95	4	9
20.9517	2	6
20.9534	8	4
20.9551	5	8
20.9567	9	11
20.9584	8	3
20.9601	7	4
20.9618	10	4
20.9635	5	3
20.9652	7	5
20.9669	9	6
20.9685	5	7
20.9702	5	3
20.9719	12	5
20.9736	5	6
20.9753	8	11
20.977	8	10
20.9787	6	5
20.9804	7	5
20.982	6	5
20.9837	4	7
20.9854	9	10
20.9871	12	2
20.9888	9	8
20.9905	9	8
20.9922	6	6
20.9938	8	6
20.9955	9	9
20.9972	5	5
20.9989	3	4
21.0006	12	1
21.0023	12	8
21.004	9	5
21.0057	6	10
21.0073	10	5
21.009	9	9
21.0107	9	7
21.0124	7	6
21.0141	5	8
21.0158	6	6
21.0175	8	7
21.0192	7	10
21.0209	10	5
21.0225	5	6
21.0242	8	2
21.0259	7	10
21.0276	8	8
21.0293	7	7
21.031	10	5
21.0327	6	6
21.0344	8	6
21.0361	4	6
21.0377	9	10
21.0394	4	5
21.0411	5	3
21.0428	10	4
21.0445	9	7
21.0462	8	10
21.0479	3	6
21.0496	7	8
21.0513	6	5
21.0529	3	7
21.0546	9	4
21.0563	7	9
21.058	13	5
21.0597	11	8
21.0614	11	7
21.0631	9	4
21.0648	11	7
21.0665	11	9
21.0682	8	6
21.0698	7	3
21.0715	6	7
21.0732	6	6
21.0749	8	5
21.0766	7	5
21.0783	9	9
21.08	7	7
21.0817	7	6
21.0834	8	8
21.0851	11	2
21.0868	6	4
21.0884	8	6
21.0901	8	13
21.0918	7	9
21.0935	10	5
21.0952	5	8
21.0969	4	3
21.0986	8	4
21.1003	10	10
21.102	5	9
21.1037	7	9
21.1054	5	4
21.1071	7	2
21.1087	3	11
21.1104	6	3
21.1121	3	8
21.1138	4	6
21.1155	6	6
21.1172	9	8
21.1189	9	6
21.1206	11	11
21.1223	7	10
21.124	8	6
21.1257	10	5
21.1274	10	5
21.1291	9	3
21.1307	10	12
21.1324	14	7
21.1341	7	6
21.1358	6	6
21.1375	5	4
21.1392	8	10
21.1409	14	6
21.1426	9	5
21.1443	10	5
21.146	5	5
21.1477	7	3
21.1494	9	4
21.1511	7	3
21.1528	4	5
21.1544	4	4
21.1561	10	10
21.1578	8	5
21.1595	10	5
21.1612	9	4
21.1629	7	10
21.1646	3	8
21.1663	6	3
21.168	4	3
21.1697	4	7
21.1714	5	9
21.1731	10	8
21.1748	11	8
21.1765	10	4
21.1782	9	14
21.1799	9	7
21.1816	6	12
21.1833	12	9
21.1849	8	8
21.1866	16	11
21.1883	8	11
21.19	12	7
21.1917	10	4
21.1934	16	1
21.1951	11	5
21.1968	7	6
21.1985	11	4
21.2002	4	6
21.2019	10	10
21.2036	4	6
21.2053	5	8
21.207	5	6
21.2087	6	5
21.2104	6	6
21.2121	10	2
21.2138	11	9
21.2155	10	3
21.2172	7	6
21.2189	11	8
21.2206	3	1
21.2223	5	4
21.224	8	7
21.2256	7	3
21.2273	9	10
21.229	9	9
21.2307	10	10
21.2324	4	11
21.2341	7	8
21.2358	5	4
21.2375	4	3
21.2392	8	0
21.2409	5	5
21.2426	9	4
21.2443	5	4
21.246	7	4
21.2477	6	3
21.2494	7	3
21.2511	2	4
21.2528	6	5
21.2545	5	5
21.2562	3	5
21.2579	11	8
21.2596	8	3
21.2613	6	3
21.263	7	0
21.2647	7	5
21.2664	4	10
21.2681	9	5
21.2698	8	5
21.2715	9	6
21.2732	10	3
21.2749	11	6
21.2766	7	10
21.2783	2	7
21.28	11	10
21.2817	6	7
21.2834	7	8
21.2851	3	5
21.2868	6	10
21.2885	12	10
21.2902	7	4
21.2919	11	3
21.2936	8	7
21.2953	5	8
21.297	10	3
21.2987	9	6
21.3004	8	8
21.3021	8	8
21.3038	5	10
21.3055	7	7
21.3072	3	9
21.3089	6	5
21.3106	10	10
21.3123	11	11
21.314	9	9
21.3157	1	6
21.3174	8	11
21.3191	7	8
21.3208	9	6
21.3225	1	3
21.3242	8	7
21.3259	4	8
21.3276	9	8
21.3293	9	9
21.331	6	5
21.3327	5	8
21.3344	5	2
21.3361	4	9
21.3378	9	5
21.3395	5	5
21.3412	6	5
21.3429	7	8
21.3446	8	7
21.3463	7	4
21.348	10	3
21.3497	5	8
21.3514	7	8
21.3531	3	13
21.3548	5	4
21.3565	3	6
21.3582	7	5
21.3599	11	4
21.3616	10	5
21.3633	3	5
21.365	7	4
21.3667	8	3
21.3684	8	4
21.3701	8	7
21.3718	8	8
21.3735	6	10
21.3752	6	7
21.3769	0	11
21.3786	5	8
21.3803	10	5
21.382	7	10
21.3837	10	2
21.3854	5	5
21.3871	10	8
21.3888	4	6
21.3905	5	4
21.3922	9	3
21.3939	6	7
21.3956	4	7
21.3974	8	4
21.3991	8	11
21.4008	11	4
21.4025	13	3
21.4042	10	11
21.4059	9	9
21.4076	10	6
21.4093	11	8
21.411	4	11
21.4127	3	6
21.4144	5	9
21.4161	13	3
21.4178	3	0
21.4195	8	9
21.4212	9	12
21.4229	8	7
21.4246	8	2
21.4263	7	6
21.428	10	7
21.4297	10	6
21.4314	3	9
21.4331	10	6
21.4348	8	5
21.4366	11	6
21.4383	6	5
21.44	8	2
21.4417	8	6
21.4434	10	5
21.4451	6	8
21.4468	6	8
21.4485	4	6
21.4502	6	10
21.4519	9	6
21.4536	8	2
21.4553	7	7
21.457	12	4
21.4587	8	2
21.4604	9	8
21.4621	9	9
21.4638	8	7
21.4655	10	9
21.4673	9	12
21.469	9	8
21.4707	8	6
21.4724	9	8
21.4741	6	3
21.4758	7	3
21.4775	6	5
21.4792	7	4
21.4809	6	4
21.4826	2	4
21.4843	6	9
21.486	8	6
21.4877	6	10
21.4894	7	10
21.4911	8	7
21.4929	6	8
21.4946	8	4
21.4963	5	4
21.498	7	5
21.4997	9	7
21.5014	10	5
21.5031	8	5
21.5048	9	5
21.5065	13	4
21.5082	8	9
21.5099	5	6
21.5116	6	2
21.5133	8	5
21.5151	7	10
21.5168	6	12
21.5185	7	4
21.5202	7	3
21.5219	8	4
21.5236	7	12
21.5253	8	7
21.527	4	8
21.5287	6	8
21.5304	6	7
21.5321	4	5
21.5338	9	7
21.5356	9	9
21.5373	5	4
21.539	6	6
21.5407	8	8
21.5424	5	4
21.5441	10	11
21.5458	4	12
21.5475	9	5
21.5492	9	7
21.5509	9	4
21.5527	6	5
21.5544	4	9
21.5561	7	6
21.5578	4	10
21.5595	6	8
21.5612	7	9
21.5629	5	9
21.5646	3	8
21.5663	8	7
21.568	3	7
21.5698	9	9
21.5715	10	6
21.5732	9	7
21.5749	8	7
21.5766	6	9
21.5783	7	7
21.58	8	5
21.5817	8	5
21.5834	4	8
21.5851	7	8
21.5869	9	9
21.5886	8	6
21.5903	6	4
21.592	8	12
21.5937	8	5
21.5954	4	12
21.5971	6	4
21.5988	7	6
21.6005	11	4
21.6023	7	8
21.604	6	6
21.6057	3	6
21.6074	5	6
21.6091	6	2
21.6108	10	4
21.6125	4	5
21.6142	15	5
21.616	10	4
21.6177	10	6
21.6194	10	6
21.6211	6	4
21.6228	7	9
21.6245	9	10
21.6262	9	7
21.6279	8	4
21.6297	4	4
21.6314	8	7
21.6331	6	6
21.6348	10	7
21.6365	8	13
21.6382	8	9
21.6399	9	2
21.6416	11	10
21.6434	5	4
21.6451	11	4
21.6468	10	10
21.6485	4	6
21.6502	3	7
21.6519	6	6
21.6536	4	11
21.6553	6	2
21.6571	8	5
21.6588	7	4
21.6605	4	7
21.6622	1	5
21.6639	6	6
21.6656	6	7
21.6673	10	7
21.6691	9	6
21.6708	10	10
21.6725	6	10
21.6742	6	5
21.6759	6	10
21.6776	6	4
21.6793	9	6
21.6811	4	5
21.6828	10	11
21.6845	7	4
21.6862	4	4
21.6879	9	6
21.6896	7	6
21.6914	9	6
21.6931	4	7
21.6948	10	8
21.6965	11	5
21.6982	8	9
21.6999	5	8
21.7016	6	9
21.7034	11	7
21.7051	3	6
21.7068	9	2
21.7085	6	8
21.7102	5	6
21.7119	6	5
21.7137	4	4
21.7154	7	8
21.7171	8	3
21.7188	8	5
21.7205	8	8
21.7222	10	13
21.724	8	5
21.7257	7	6
21.7274	2	3
21.7291	11	3
21.7308	11	13
21.7325	3	9
21.7343	6	4
21.736	11	8
21.7377	4	6
21.7394	10	4
21.7411	3	7
21.7428	6	4
21.7446	13	7
21.7463	8	3
21.748	5	7
21.7497	10	8
21.7514	9	7
21.7531	7	7
21.7549	8	7
21.7566	10	9
21.7583	13	6
21.76	5	5
21.7617	3	7
21.7635	6	6
21.7652	7	5
21.7669	10	3
21.7686	7	9
21.7703	8	4
21.772	7	8
21.7738	3	11
21.7755	9	5
21.7772	7	7
21.7789	7	6
21.7806	4	4
21.7824	4	7
21.7841	4	7
21.7858	4	8
21.7875	5	8
21.7892	4	3
21.7909	8	6
21.7927	8	3
21.7944	10	6
21.7961	12	5
21.7978	7	9
21.7995	8	5
21.8013	7	2
21.803	15	6
21.8047	3	5
21.8064	8	7
21.8081	7	4
21.8099	3	6
21.8116	8	2
21.8133	8	3
21.815	10	7
21.8167	10	6
21.8185	4	2
21.8202	5	6
21.8219	8	6
21.8236	12	6
21.8253	8	7
21.8271	6	6
21.8288	5	5
21.8305	7	3
21.8322	6	4
21.8339	12	8
21.8357	7	3
21.8374	6	6
21.8391	11	3
21.8408	11	6
21.8425	11	9
21.8443	6	7
21.846	11	5
21.8477	12	4
21.8494	5	7
21.8512	5	7
21.8529	9	12
21.8546	12	7
21.8563	4	5
21.858	6	6
21.8598	7	7
21.8615	6	6
21.8632	8	9
21.8649	3	8
21.8666	7	3
21.8684	13	7
21.8701	6	9
21.8718	11	3
21.8735	10	6
21.8753	8	4
21.877	10	6
21.8787	5	7
21.8804	5	6
21.8822	6	9
21.8839	7	4
21.8856	8	8
21.8873	8	8
21.889	10	5
21.8908	6	7
21.8925	7	5
21.8942	5	7
21.8959	3	5
21.8977	7	2
21.8994	7	7
21.9011	7	8
21.9028	8	8
21.9046	8	6
21.9063	11	9
21.908	12	5
21.9097	7	12
21.9114	8	9
21.9132	2	11
21.9149	4	12
21.9166	11	9
21.9183	4	3
21.9201	6	11
21.9218	7	8
21.9235	5	3
21.9252	5	3
21.927	4	10
21.9287	4	8
21.9304	4	8
21.9321	4	10
21.9339	9	9
21.9356	11	6
21.9373	6	5
21.939	12	7
21.9408	11	5
21.9425	11	7
21.9442	10	6
21.9459	7	9
21.9477	5	7
21.9494	10	3
21.9511	6	6
21.9528	3	2
21.9546	5	4
21.9563	5	6
21.958	6	9
21.9597	9	4
21.9615	8	6
21.9632	9	4
21.9649	7	8
21.9666	8	6
21.9684	6	8
21.9701	7	10
21.9718	5	10
21.9735	5	8
21.9753	9	3
21.977	3	4
21.9787	3	5
21.9805	10	4
21.9822	11	9
21.9839	7	6
21.9856	9	6
21.9874	4	11
21.9891	7	11
21.9908	3	2
21.9925	3	10
21.9943	6	9
21.996	3	4
21.9977	7	3
21.9995	6	5
22.0012	7	7
22.0029	4	6
22.0046	9	8
22.0064	8	8
22.0081	9	6
22.0098	6	3
22.0115	9	5
22.0133	7	8
22.015	5	4
22.0167	5	12
22.0185	5	6
22.0202	8	9
22.0219	4	4
22.0236	4	7
22.0254	7	2
22.0271	4	5
22.0288	7	3
22.0306	11	7
22.0323	11	8
22.034	5	9
22.0357	7	9
22.0375	9	8
22.0392	8	7
22.0409	8	4
22.0427	9	7
22.0444	12	7
22.0461	9	7
22.0478	7	8
22.0496	7	4
22.0513	5	7
22.053	8	11
22.0548	10	10
22.0565	6	7
22.0582	8	11
22.0599	7	6
22.0617	5	5
22.0634	11	6
22.0651	6	3
22.0669	7	4
22.0686	11	3
22.0703	8	4
22.0721	10	5
22.0738	6	8
22.0755	12	9
22.0772	10	7
22.079	10	7
22.0807	7	9
22.0824	9	9
22.0842	9	9
22.0859	4	7
22.0876	9	4
22.0894	14	9
22.0911	9	8
22.0928	17	10
22.0946	6	7
22.0963	9	11
22.098	11	5
22.0997	10	7
22.1015	13	5
22.1032	8	7
22.1049	12	11
22.1067	6	3
22.1084	7	6
22.1101	5	9
22.1119	10	5
22.1136	7	7
22.1153	5	6
22.1171	5	5
22.1188	4	6
22.1205	7	3
22.1223	9	7
22.124	15	9
22.1257	7	6
22.1275	11	10
22.1292	6	7
22.1309	5	10
22.1327	11	11
22.1344	4	10
22.1361	7	5
22.1378	6	5
22.1396	9	5
22.1413	7	4
22.143	7	7
22.1448	8	10
22.1465	7	3
22.1482	9	5
22.15	8	5
22.1517	5	8
22.1534	10	8
22.1552	8	3
22.1569	5	5
22.1586	6	1
22.1604	7	7
22.1621	5	7
22.1638	5	6
22.1656	7	4
22.1673	7	4
22.169	6	4
22.1708	6	5
22.1725	8	7
22.1743	5	5
22.176	8	13
22.1777	11	1
22.1795	9	5
22.1812	12	6
22.1829	11	4
22.1847	6	4
22.1864	5	9
22.1881	6	8
22.1899	6	8
22.1916	10	7
22.1933	9	6
22.1951	4	7
22.1968	8	4
22.1985	12	4
22.2003	6	9
22.202	7	7
22.2037	9	8
22.2055	7	2
22.2072	5	7
22.2089	9	3
22.2107	6	6
22.2124	10	8
22.2142	8	9
22.2159	5	8
22.2176	6	8
22.2194	6	5
22.2211	4	7
22.2228	9	4
22.2246	5	9
22.2263	7	9
22.228	10	8
22.2298	7	6
22.2315	5	7
22.2332	8	6
22.235	7	5
22.2367	9	5
22.2385	6	6
22.2402	5	6
22.2419	6	4
22.2437	8	3
22.2454	4	5
22.2471	14	9
22.2489	6	7
22.2506	14	12
22.2524	8	7
22.2541	5	10
22.2558	7	12
22.2576	7	9
22.2593	10	9
22.261	4	4
22.2628	9	7
22.2645	6	11
22.2663	6	3
22.268	3	8
22.2697	5	1
22.2715	3	9
22.2732	5	7
22.2749	7	2
22.2767	7	6
22.2784	3	10
22.2802	10	7
22.2819	6	3
22.2836	8	11
22.2854	11	8
22.2871	8	6
22.2888	5	5
22.2906	3	8
22.2923	3	9
22.2941	9	4
22.2958	7	10
22.2975	7	7
22.2993	10	7
22.301	14	5
22.3028	4	5
22.3045	3	8
22.3062	9	9
22.308	4	10
22.3097	5	11
22.3115	4	11
22.3132	4	4
22.3149	7	3
22.3167	8	8
22.3184	7	6
22.3202	7	3
22.3219	10	9
22.3236	4	1
22.3254	6	9
22.3271	6	2
22.3289	7	3
22.3306	8	8
22.3323	6	7
22.3341	4	5
22.3358	10	9
22.3376	6	9
22.3393	12	5
22.341	6	1
22.3428	10	8
22.3445	4	11
22.3463	11	7
22.348	6	9
22.3497	8	4
22.3515	9	9
22.3532	10	7
22.355	8	7
22.3567	5	4
22.3584	8	6
22.3602	5	9
22.3619	6	9
22.3637	3	6
22.3654	4	1
22.3672	5	4
22.3689	2	7
22.3706	7	4
22.3724	6	2
22.3741	4	4
22.3759	11	4
22.3776	9	6
22.3793	8	6
22.3811	5	7
22.3828	6	6
22.3846	11	7
22.3863	9	6
22.3881	3	11
22.3898	11	7
22.3915	4	8
22.3933	2	10
22.395	8	10
22.3968	9	7
22.3985	10	6
22.4003	7	7
22.402	6	4
22.4037	7	6
22.4055	10	5
22.4072	7	4
22.409	5	6
22.4107	9	5
22.4125	6	3
22.4142	6	8
22.416	5	3
22.4177	12	4
22.4194	11	5
22.4212	6	6
22.4229	7	6
22.4247	6	6
22.4264	7	6
22.4282	4	7
22.4299	6	11
22.4316	5	8
22.4334	8	5
22.4351	11	7
22.4369	10	1
22.4386	5	5
22.4404	14	7
22.4421	3	6
22.4439	3	3
22.4456	5	9
22.4473	6	10
22.4491	10	6
22.4508	8	5
22.4526	4	2
22.4543	9	6
22.4561	6	4
22.4578	6	3
22.4596	7	8
22.4613	6	9
22.4631	8	5
22.4648	10	7
22.4665	7	7
22.4683	9	5
22.47	2	4
22.4718	7	6
22.4735	5	5
22.4753	9	6
22.477	7	4
22.4788	7	3
22.4805	10	3
22.4823	10	5
22.484	12	3
22.4857	6	6
22.4875	11	8
22.4892	3	5
22.491	5	7
22.4927	6	4
22.4945	10	7
22.4962	17	5
22.498	6	11
22.4997	4	8
22.5015	8	5
22.5032	7	8
22.505	8	10
22.5067	6	6
22.5085	10	7
22.5102	12	12
22.5119	7	10
22.5137	7	10
22.5154	8	4
22.5172	7	5
22.5189	10	6
22.5207	6	7
22.5224	13	6
22.5242	11	0
22.5259	5	6
22.5277	7	3
22.5294	6	12
22.5312	1	6
22.5329	5	6
22.5347	6	7
22.5364	6	13
22.5382	4	8
22.5399	5	4
22.5417	9	4
22.5434	2	4
22.5452	4	6
22.5469	9	4
22.5487	4	4
22.5504	9	6
22.5522	4	10
22.5539	4	9
22.5556	9	4
22.5574	2	6
22.5591	7	9
22.5609	8	6
22.5626	7	7
22.5644	9	4
22.5661	11	5
22.5679	8	7
22.5696	4	6
22.5714	10	5
22.5731	4	6
22.5749	5	7
22.5766	9	7
22.5784	12	11
22.5801	7	8
22.5819	4	11
22.5836	7	3
22.5854	6	8
22.5871	10	7
22.5889	5	5
22.5906	12	4
22.5924	8	5
22.5941	8	4
22.5959	10	6
22.5976	10	7
22.5994	10	5
22.6011	12	4
22.6029	7	7
22.6046	18	11
22.6064	8	10
22.6082	5	9
22.6099	9	4
22.6117	7	2
22.6134	7	6
22.6152	9	8
22.6169	7	9
22.6187	9	3
22.6204	10	6
22.6222	3	13
22.6239	10	6
22.6257	6	4
22.6274	7	10
22.6292	4	4
22.6309	5	10
22.6327	8	9
22.6344	11	7
22.6362	6	3
22.6379	6	8
22.6397	5	7
22.6414	6	6
22.6432	5	11
22.6449	5	7
22.6467	9	9
22.6484	11	5
22.6502	6	7
22.6519	6	7
22.6537	10	5
22.6555	6	5
22.6572	10	7
22.659	9	8
22.6607	4	4
22.6625	9	9
22.6642	11	3
22.666	12	2
22.6677	7	7
22.6695	3	3
22.6712	9	6
22.673	5	8
22.6747	3	7
22.6765	8	4
22.6782	5	11
22.68	10	8
22.6818	10	8
22.6835	9	7
22.6853	11	12
22.687	8	4
22.6888	2	8
22.6905	5	8
22.6923	8	12
22.694	7	6
22.6958	6	10
22.6975	6	8
22.6993	3	6
22.701	8	6
22.7028	4	4
22.7046	9	5
22.7063	7	13
22.7081	5	7
22.7098	10	12
22.7116	8	8
22.7133	5	3
22.7151	9	7
22.7168	8	8
22.7186	7	5
22.7204	8	5
22.7221	6	7
22.7239	5	6
22.7256	8	7
22.7274	4	9
22.7291	3	8
22.7309	6	6
22.7326	8	8
22.7344	4	5
22.7362	4	9
22.7379	7	3
22.7397	6	2
22.7414	9	2
22.7432	3	6
22.7449	3	5
22.7467	3	7
22.7484	5	5
22.7502	6	6
22.752	13	6
22.7537	11	6
22.7555	6	6
22.7572	6	10
22.759	4	7
22.7607	10	7
22.7625	4	6
22.7643	10	8
22.766	9	4
22.7678	9	7
22.7695	3	5
22.7713	5	7
22.773	5	8
22.7748	8	9
22.7766	4	9
22.7783	5	7
22.7801	5	12
22.7818	10	12
22.7836	8	4
22.7853	10	3
22.7871	6	10
22.7889	3	11
22.7906	8	3
22.7924	6	9
22.7941	6	9
22.7959	8	8
22.7977	11	10
22.7994	5	6
22.8012	11	10
22.8029	4	5
22.8047	8	7
22.8064	6	4
22.8082	8	9
22.81	9	7
22.8117	6	5
22.8135	7	6
22.8152	7	8
22.817	5	8
22.8188	7	6
22.8205	7	5
22.8223	9	3
22.824	10	7
22.8258	9	6
22.8276	5	7
22.8293	3	7
22.8311	6	1
22.8328	5	6
22.8346	7	6
22.8364	5	5
22.8381	7	10
22.8399	6	2
22.8416	6	4
22.8434	9	5
22.8452	5	2
22.8469	8	11
22.8487	8	9
22.8504	13	7
22.8522	11	5
22.854	11	4
22.8557	11	6
22.8575	4	11
22.8592	9	6
22.861	6	6
22.8628	5	3
22.8645	11	3
22.8663	5	4
22.868	6	8
22.8698	9	5
22.8716	4	4
22.8733	4	3
22.8751	6	6
22.8768	8	9
22.8786	6	8
22.8804	9	11
22.8821	6	11
22.8839	7	13
22.8857	6	3
22.8874	5	8
22.8892	4	9
22.8909	5	3
22.8927	8	5
22.8945	5	8
22.8962	1	5
22.898	6	11
22.8997	9	4
22.9015	7	9
22.9033	4	6
22.905	12	4
22.9068	6	6
22.9086	9	8
22.9103	3	6
22.9121	11	4
22.9139	5	5
22.9156	7	9
22.9174	11	6
22.9191	6	5
22.9209	8	4
22.9227	4	7
22.9244	4	7
22.9262	3	1
22.928	10	8
22.9297	2	8
22.9315	6	5
22.9332	7	8
22.935	4	7
22.9368	7	6
22.9385	3	3
22.9403	9	8
22.9421	4	9
22.9438	8	6
22.9456	5	3
22.9474	3	8
22.9491	6	9
22.9509	10	6
22.9527	15	8
22.9544	5	9
22.9562	11	8
22.9579	3	9
22.9597	13	7
22.9615	12	6
22.9632	4	8
22.965	7	8
22.9668	4	4
22.9685	8	6
22.9703	8	7
22.9721	5	8
22.9738	7	8
22.9756	4	9
22.9774	8	6
22.9791	11	5
22.9809	10	5
22.9827	4	8
22.9844	3	6
22.9862	16	10
22.9879	9	17
22.9897	15	25
22.9915	31	18
22.9932	28	17
22.995	16	14
22.9968	7	6
22.9985	4	8
23.0003	9	9
23.0021	6	5
23.0038	6	5
23.0056	4	4
23.0074	6	9
23.0091	7	9
23.0109	8	8
23.0127	12	7
23.0144	5	3
23.0162	10	4
23.018	2	2
23.0197	4	4
23.0215	9	3
23.0233	10	5
23.025	5	10
23.0268	6	5
23.0286	5	5
23.0303	6	7
23.0321	6	5
23.0339	9	5
23.0356	7	7
23.0374	7	6
23.0392	13	4
23.041	12	7
23.0427	9	9
23.0445	8	9
23.0463	5	6
23.048	7	10
23.0498	6	3
23.0516	9	6
23.0533	8	2
23.0551	6	2
23.0569	6	5
23.0586	6	4
23.0604	8	8
23.0622	5	6
23.0639	7	7
23.0657	8	8
23.0675	8	6
23.0692	6	5
23.071	4	5
23.0728	11	7
23.0745	7	9
23.0763	6	7
23.0781	4	4
23.0799	10	6
23.0816	7	5
23.0834	12	5
23.0852	13	6
23.0869	5	6
23.0887	6	7
23.0905	4	3
23.0922	4	6
23.094	6	6
23.0958	10	9
23.0975	9	5
23.0993	7	5
23.1011	9	4
23.1029	7	8
23.1046	9	4
23.1064	10	6
23.1082	5	8
23.1099	7	5
23.1117	5	6
23.1135	10	4
23.1153	4	5
23.117	5	9
23.1188	5	5
23.1206	6	8
23.1223	10	6
23.1241	7	6
23.1259	6	8
23.1276	6	6
23.1294	10	8
23.1312	8	10
23.133	10	9
23.1347	7	8
23.1365	7	9
23.1383	4	7
23.14	10	3
23.1418	9	4
23.1436	6	7
23.1454	3	8
23.1471	9	7
23.1489	7	5
23.1507	6	5
23.1525	7	3
23.1542	4	7
23.156	4	5
23.1578	7	3
23.1595	9	6
23.1613	9	3
23.1631	6	8
23.1649	6	11
23.1666	5	7
23.1684	6	4
23.1702	6	7
23.1719	8	6
23.1737	11	7
23.1755	10	2
23.1773	6	6
23.179	5	4
23.1808	8	5
23.1826	10	7
23.1844	8	6
23.1861	9	7
23.1879	9	5
23.1897	6	4
23.1914	6	4
23.1932	5	4
23.195	5	6
23.1968	4	4
23.1985	9	7
23.2003	12	4
23.2021	4	2
23.2039	5	6
23.2056	6	6
23.2074	7	5
23.2092	4	5
23.211	4	12
23.2127	9	9
23.2145	7	6
23.2163	8	5
23.2181	9	6
23.2198	5	3
23.2216	3	7
23.2234	5	8
23.2252	7	3
23.2269	5	9
23.2287	7	10
23.2305	6	11
23.2323	11	10
23.234	4	7
23.2358	5	5
23.2376	2	6
23.2394	6	9
23.2411	4	8
23.2429	7	6
23.2447	10	6
23.2465	11	5
23.2482	7	6
23.25	9	6
23.2518	6	8
23.2536	8	7
23.2553	12	3
23.2571	10	7
23.2589	3	9
23.2607	5	5
23.2624	7	3
23.2642	6	7
23.266	4	13
23.2678	12	9
23.2695	7	3
23.2713	10	8
23.2731	17	3
23.2749	9	16
23.2767	9	6
23.2784	10	8
23.2802	6	7
23.282	4	6
23.2838	3	2
23.2855	2	7
23.2873	5	8
23.2891	14	8
23.2909	9	5
23.2926	5	7
23.2944	6	7
23.2962	6	5
23.298	9	6
23.2998	7	8
23.3015	4	5
23.3033	6	4
23.3051	13	4
23.3069	8	1
23.3086	6	1
23.3104	5	4
23.3122	9	8
23.314	10	5
23.3158	6	6
23.3175	6	11
23.3193	6	2
23.3211	6	3
23.3229	9	8
23.3246	4	4
23.3264	8	7
23.3282	2	8
23.33	8	6
23.3318	5	4
23.3335	7	6
23.3353	3	6
23.3371	7	9
23.3389	6	9
23.3407	5	5
23.3424	6	6
23.3442	4	5
23.346	3	6
23.3478	4	10
23.3496	12	3
23.3513	10	5
23.3531	10	6
23.3549	9	7
23.3567	7	8
23.3585	4	3
23.3602	0	5
23.362	3	6
23.3638	6	5
23.3656	5	8
23.3674	8	9
23.3691	2	4
23.3709	8	5
23.3727	8	7
23.3745	15	6
23.3763	13	6
23.378	8	4
23.3798	5	4
23.3816	5	5
23.3834	5	3
23.3852	4	12
23.3869	7	6
23.3887	6	7
23.3905	10	2
23.3923	6	4
23.3941	8	2
23.3958	10	9
23.3976	7	9
23.3994	6	6
23.4012	10	6
23.403	6	13
23.4048	6	6
23.4065	4	7
23.4083	5	4
23.4101	10	4
23.4119	8	5
23.4137	5	8
23.4154	7	6
23.4172	4	4
23.419	3	4
23.4208	6	3
23.4226	7	5
23.4244	3	3
23.4261	9	1
23.4279	11	7
[truncated: 216,567+ more rows]

## Sheet: Figure 3
m/z	a	b
25.5133	1.013	3.038
25.9054	1.013	1.013
27.527	1.013	14.18
30.0363	2.025	1.013
30.4507	1.013	4.463
31.166	1.013	858.8
32.2108	1.013	2.025
34.3994	1.013	28.59
40.7036	1.013	3.038
40.8118	1.013	3.038
47.0162	1.013	4.051
55.9397	6.076	3.038
56.4049	1.013	1.013
56.9455	1.013	1.013
57.6479	1.013	4.051
57.7486	1.013	2.025
58.0675	4.051	1.013
60.0805	1.013	2.025
65.028	2.025	4.051
68.0482	2.025	2.025
70.0678	195.6	4.051
70.1613	3.038	3.038
70.2007	2.025	1.013
70.5266	1.013	4.051
70.5544	2.025	1.013
70.5792	1.013	1.013
70.6828	2.025	2.025
70.9526	2.025	2.025
70.9633	1.013	5.063
70.9882	1.013	3.038
71.0471	1.013	3.038
71.0689	1.013	5.063
71.1962	1.013	3.038
71.5042	1.013	3.038
71.9283	1.013	1.013
72.943	6.076	1.013
72.9878	1.013	47.59
73.0444	1.013	1.013
75.8854	1.013	1.013
80.3671	1.013	2.025
86.0647	14.18	1.013
86.2038	1.013	2.025
89.9431	1.013	2.025
93.0231	4.051	3.038
93.0516	2.025	2.025
96.961	26.32	1.013
97.9708	11.14	1.013
98.9411	1.013	1.013
98.9576	2.025	1.013
99.975	2.025	1.013
100.934	4.051	1.013
100.964	2.025	2.025
101.941	6.076	1.013
101.968	3.038	1.013
102.105	1.013	1.013
102.941	1.013	1.013
103.06	1.013	1.013
103.082	1.013	2.025
106.92	1.013	1.013
110.048	2.025	1.013
112.251	1.013	1.013
112.935	1.013	1.013
112.959	1.013	361.6
113.964	6.076	4.051
115.965	3.038	1.013
115.988	1.013	1.013
116.636	1.013	1.013
116.98	2.025	2.025
117.937	9.114	1.013
117.972	1.013	1.013
118.96	2.025	1.013
119.046	1.013	24.74
119.063	1.013	1.013
119.083	1.013	1.013
123.966	1.013	1.013
124.13	1.013	7.089
126.062	3.038	1.013
126.953	3.038	2.025
127.09	490.4	1.013
127.141	2.025	2.025
127.22	4.051	1.013
127.426	1.013	1.013
127.54	2.025	2.025
127.584	1.013	37.47
127.621	1.013	1243
127.65	3.038	22.28
127.691	3.038	4.051
127.784	1.013	4.051
127.837	3.038	1.013
127.896	1.013	1.013
127.913	1.013	2.025
127.938	1.013	2.025
127.975	1.013	9.082
128.013	1.013	5.063
128.093	43.12	2.025
128.234	1.013	2.025
128.576	1.013	3.038
128.755	1.013	3.135
128.78	1.013	4.051
128.827	1.013	7.177
128.856	1.013	6.609
128.931	1.013	2.025
128.952	1.013	4.051
129.023	1.013	1.013
129.043	1.013	11
129.27	1.013	99.24
129.651	1.013	3.038
129.865	1.013	1.013
130.201	1.013	5.063
130.803	1.013	3.038
130.976	2.025	3.038
131.026	1.013	3.038
131.917	1.013	1.013
132.068	112.3	2.025
132.202	2.025	2.025
132.294	1.013	2.025
132.612	1.013	2.025
132.628	1.013	1.013
132.943	1.013	1.013
133.071	7.489	3.038
133.121	1.013	1.013
133.414	1.013	1.013
133.606	1.013	2.025
135.046	13.16	2.025
135.408	1.013	2.025
136.4	1.013	3.038
137.076	1.013	1.013
137.961	1.013	9.7
140.071	1.013	6.615
140.996	1.013	1.013
141.124	1.013	1.013
141.965	12.63	1.013
143.545	1.013	1.013
144.676	1.013	2.025
144.929	1.013	2.025
144.982	1.013	1.013
145.933	27.34	1.013
146.935	1.013	2.025
146.966	2.025	1.013
147.843	1.013	1.013
147.923	1.013	4.051
147.964	1.013	1.013
148.107	1.013	1.013
148.264	1.013	1.013
148.3	1.013	1.013
149.026	8.101	1.013
151.928	1.013	1.013
152.552	2.025	6.659
153.132	1.013	1.013
154.773	1.013	3.038
155.02	3.038	1.013
155.083	1172	16.2
155.148	1.013	1.013
155.186	1.013	1.013
155.22	13.16	1.013
155.286	4.051	1.013
155.312	2.025	1.013
155.387	1.013	2.025
155.429	1.013	1682
155.534	3.038	1.013
155.577	3.935	25.32
155.647	3.038	14.18
155.698	4.051	2.025
155.725	2.025	1.013
155.778	2.025	3.038
155.836	2.283	1.013
155.9	11.14	2.025
155.995	3.533	2.025
156.089	123.9	2.025
156.148	4.051	6.076
156.185	4.083	4.051
156.231	7.648	5.952
156.276	6.076	8.408
156.311	5.776	8.641
156.364	5.063	3.038
156.42	4.051	8.101
156.45	3.038	6.292
156.486	1.013	7.833
156.519	1.013	4.711
156.54	2.025	7.089
156.629	2.025	195
156.68	1.013	3.038
156.719	2.025	5.063
156.761	4.051	3.038
156.831	4.051	4.051
156.936	2.025	3.038
157.04	4.051	5.508
157.089	11.14	5.591
157.146	1.013	7.089
157.192	3.038	3.038
157.234	1.013	1.013
157.289	1.013	4.051
157.317	1.013	9.251
157.368	3.038	5.063
157.455	3.038	3.038
157.613	1.013	3.038
157.737	1.013	2.025
157.793	1.013	3.038
157.966	2.025	4.051
158.02	1.013	1.013
158.061	1.013	1.013
158.321	1.013	1.013
158.395	1.013	18.96
158.882	3.038	4.051
158.975	1.013	1.013
159.147	1.013	1.013
159.379	1.013	1.013
159.588	1.013	4.051
159.798	1.013	1.013
160.1	2.025	2.025
161.296	1.013	1.013
162.867	1.013	1.013
163.037	4.444	1.013
163.951	2.025	3.038
165.059	13.16	1.013
165.821	1.013	1.013
166.225	1.013	2.025
166.828	1.013	3.038
171.155	5.063	1.013
172.101	1.013	1.013
173.101	2.025	1.013
174.939	1.013	1.013
175.715	1.013	2.025
175.994	1.013	2.025
176.927	17.22	1.013
177.026	1.013	4.051
178.13	5.063	1.013
179.124	1.013	1.013
181.096	1.013	1.013
182.386	1.013	1.013
183.073	1.013	3.038
186.963	4.051	2.025
191.961	2.025	1.013
193.989	1.013	42.51
194.122	88.1	4.051
194.955	4.051	18.23
195.119	9.114	1.013
195.217	1.013	5.063
197.98	1.013	3.038
198.027	1.013	1.013
202.35	1.013	1.013
207.035	1.013	7.089
208.053	1.013	1.013
215.918	1.013	3.038
216.003	2.025	1.013
217.084	1.013	150
218.002	1.013	10.13
219.969	1.013	2.025
222.113	38.48	1.013
222.285	1.013	4.051
223.063	4.051	1.013
223.123	2.025	3.038
224.129	117.1	6.474
224.786	1.013	2.025
224.989	1.013	7.381
225.141	19.24	2.025
225.322	1.013	7.089
225.665	1.013	1.013
225.842	1.013	3.038
225.879	1.013	2.025
225.99	1.013	122.3
226.15	1.013	1.744
226.206	1.013	5.063
226.238	1.013	7.302
227.122	1.013	2.025
227.182	1.013	4.051
229.126	54.68	3.038
230.123	4.051	1.013
235.18	2.025	1.013
236.129	3.038	3.038
236.172	1.013	6.34
240.144	1.013	10.13
242.154	5.063	3.038
248.049	1.013	2.025
252.157	1.013	3.038
253.017	1.013	3.038
267.071	14.18	1.013
268.066	1.013	3.038
268.127	6.276	3.038
269.007	1.013	10.13
269.118	39.49	1.013
270.127	3.038	3.038
273.55	1.013	3.038
274.518	1.013	3.038
275.117	1.013	2.025
277.032	1.013	2.025
281.957	1.013	2.693
282.056	1.013	2.025
282.212	1.013	1.013
284.289	1.013	1.013
285.694	1.013	1.013
286.025	2.025	1.013
286.141	1134	2.025
286.324	18.23	2.025
286.421	7.089	2.025
286.537	2.025	1.013
286.574	2.025	1.013
286.686	3.038	1.013
286.736	2.025	1.013
286.784	4.051	1.013
286.843	6.076	1.013
286.943	4.051	1.013
287.048	3.189	1.013
287.147	169.6	1.013
287.259	5.334	1.013
287.317	2.025	7.089
287.367	4.051	18.23
287.434	11.88	2.025
287.528	8.3	2.025
287.589	4.734	49.62
287.666	3.038	1.013
287.726	3.038	6.076
287.798	6.076	1.013
287.877	5.141	1.013
287.969	8.101	1.013
288.147	32.13	4.051
288.282	5.811	2.025
288.322	5.063	1.013
288.383	1.013	4.051
288.427	1.013	3.038
288.457	1.013	6.565
288.52	5.063	1.013
288.582	3.038	1.013
288.641	6.076	2.025
288.707	4.051	1.013
288.759	5.063	2.025
288.816	5.063	246.6
288.872	2.025	1.013
288.941	2.025	43.54
288.995	1.013	2.025
289.065	1.013	1.013
289.153	3.038	1.013
289.284	1.013	1.013
289.373	3.038	2.025
289.552	1.013	2.025
289.596	1.013	1.013
289.645	1.013	2.025
289.885	1.013	2.025
290.017	1.013	138.6
290.115	1.013	1.013
290.387	1.013	21.27
290.586	1.013	2.025
290.712	1.013	2.025
290.943	3.038	1.013
291.029	3.038	1.013
291.455	1.013	1.013
291.516	1.013	22.28
291.649	1.013	47.04
294.676	1.013	7.089
295.063	12.15	1.013
296.06	2.025	2.025
299.616	1.013	1.013
305.199	1.013	10.13
305.624	1.013	1140
308.124	50.63	12.05
308.987	1.013	3.038
309.117	5.063	1.013
314.089	1.013	2.025
315.044	1.013	4.051
324.097	15.19	3.038
331.032	1.013	5.063
335.119	1.013	2.025
340.07	9.114	222.1
341.076	2.025	6.629
342.071	1.013	8.023
343.064	2.025	11.14
344.31	1.013	4.051
348.031	1.013	9.114
349.331	1.013	9.114
350.067	1.013	3.038
351.08	1.013	5.063
355.076	40.51	2.025
356.071	17.22	33.47
356.572	1.013	16.7
357.073	13.16	4.051
358.1	2.025	1.864
359.061	1.013	3.038
371.108	13.16	2.025
372.113	4.051	1.013
375.068	2.025	1.013
377.049	2.025	3.038
379.096	1.013	6.86
381.068	1.013	4.49
385.079	2.025	1.013
386.078	2.025	4.051
388.036	1.013	3.038
392.03	1.013	6.076
429.07	1.013	1.013
430.265	1.013	2.025
431.131	2.025	1.013
433.089	1.013	2.55
437.038	1.013	2.025
437.137	1.013	3.038
440.145	1.013	6.076
441.938	1.013	8.765
460.108	1.013	2.025
467.15	1.013	1.013
		1.013
		1.013
		1.013
		1.013
		1.013
		1.013
		6.076
		1.013
		1.013
		1.013
		1.013
		1.013
		1.013
		1.013
		1.013
		2.025
		2.025

## Sheet: Figure4&5
时间	AP-1	AP-1'	AP-1''	AP-2	AP-2'	AP-2''	APG-1	APG-1'	APG-1''	APG-2	APG-2'	APG-2''
0	9.53674e-08	0.000103512	9.53674e-08	1.84298e-05	1.84298e-05	-2.93066e-05	2.18868e-05	0.000149018	2.18868e-05	2.87533e-05	-8.74783e-06	2.87533e-05
0.0166667	7.86781e-07	8.10214e-05	1.55767e-06	4.54545e-05	3.60886e-05	-2.77557e-05	5.38588e-05	0.000123182	4.25259e-05	5.69105e-05	-8.20613e-06	4.704e-05
0.0333333	3.79086e-06	5.34735e-05	3.13759e-06	4.43816e-05	3.39365e-05	-2.86598e-05	5.18322e-05	8.91451e-05	3.95489e-05	5.54562e-05	-9.30626e-06	4.3993e-05
0.05	6.4373e-06	2.58717e-05	-3.985e-07	3.8445e-05	1.99318e-05	-3.2348e-05	4.39882e-05	5.25655e-05	2.41518e-05	4.80413e-05	-1.24486e-05	3.01872e-05
0.0666667	4.57764e-06	2.40346e-06	-2.07689e-06	2.29716e-05	7.19494e-06	-3.84624e-05	2.61784e-05	1.83826e-05	1.04057e-05	3.08037e-05	-1.74114e-05	2.12325e-05
0.0833333	-4.52995e-06	-1.4175e-05	2.16094e-06	-2.53916e-06	1.79897e-06	-4.61333e-05	-1.33514e-06	-9.93733e-06	3.74101e-06	5.62668e-06	-2.343e-05	2.03956e-05
0.1	-1.39475e-05	-2.28375e-05	4.4996e-06	-2.76208e-05	-2.66705e-06	-5.43166e-05	-2.73466e-05	-3.08087e-05	-1.91819e-06	-1.42813e-05	-2.94907e-05	1.85143e-05
0.116667	-1.4019e-05	-2.42252e-05	6.04065e-06	-3.94464e-05	-1.11894e-05	-6.21646e-05	-3.94344e-05	-4.45147e-05	-1.25495e-05	-1.69754e-05	-3.47229e-05	1.23804e-05
0.133333	-1.88351e-06	-2.0259e-05	6.6367e-06	-3.53217e-05	-2.10665e-05	-6.92927e-05	-3.59774e-05	-5.28076e-05	-2.49126e-05	-3.24249e-06	-3.8734e-05	4.9526e-06
0.15	1.59025e-05	-1.35339e-05	6.6302e-06	-2.40922e-05	-3.14008e-05	-7.58521e-05	-2.62976e-05	-5.82444e-05	-3.79627e-05	1.4329e-05	-4.17619e-05	-2.7028e-06
0.166667	2.65598e-05	-6.64882e-06	6.6367e-06	-2.08736e-05	-4.10763e-05	-8.23938e-05	-2.62022e-05	-6.3439e-05	-5.04451e-05	1.89304e-05	-4.45835e-05	-9.39369e-06
0.183333	2.58207e-05	-1.62891e-06	7.38663e-06	-3.06964e-05	-4.91045e-05	-8.95877e-05	-4.03643e-05	-7.04179e-05	-6.13386e-05	8.05855e-06	-4.82171e-05	-1.43268e-05
0.2	1.77383e-05	4.34527e-07	8.91251e-06	-4.82917e-05	-5.55158e-05	-9.79125e-05	-6.30856e-05	-8.02255e-05	-7.07886e-05	-1.05619e-05	-5.35301e-05	-1.79919e-05
0.216667	1.03474e-05	-5.34367e-07	1.03734e-05	-6.42657e-05	-6.15001e-05	-0.000107439	-8.41618e-05	-9.28494e-05	-8.01347e-05	-2.62499e-05	-6.09016e-05	-2.198e-05
0.233333	6.36578e-06	-3.77863e-06	1.06595e-05	-7.5233e-05	-6.84966e-05	-0.000117785	-9.95636e-05	-0.000107439	-9.08484e-05	-3.61681e-05	-7.00644e-05	-2.77779e-05
0.25	4.64916e-06	-8.0746e-06	9.25497e-06	-8.34584e-05	-7.71642e-05	-0.000128257	-0.000111127	-0.000122716	-0.000103524	-4.27961e-05	-8.01873e-05	-3.57216e-05
0.266667	3.71933e-06	-1.21607e-05	6.84911e-06	-9.08494e-05	-8.68288e-05	-0.000138114	-0.000121164	-0.000137442	-0.000117267	-4.86374e-05	-9.01631e-05	-4.45995e-05
0.283333	2.83718e-06	-1.5104e-05	4.50178e-06	-9.8145e-05	-9.63612e-05	-0.00014685	-0.000131297	-0.000150783	-0.000130723	-5.45979e-05	-9.89956e-05	-5.30265e-05
0.3	2.0504e-06	-1.65113e-05	2.90438e-06	-0.000105274	-0.000105053	-0.000154377	-0.000142241	-0.000162493	-0.000143049	-6.08444e-05	-0.00010614	-6.03307e-05
0.316667	1.26362e-06	-1.65458e-05	1.98538e-06	-0.000112283	-0.000113014	-0.000161046	-0.000153828	-0.000172885	-0.00015438	-6.70195e-05	-0.000111672	-6.68201e-05
0.333333	4.52995e-07	-1.57724e-05	1.39583e-06	-0.000119436	-0.000120602	-0.000167495	-0.000165725	-0.000182617	-0.000165239	-7.30515e-05	-0.000116229	-7.30276e-05
0.35	9.53674e-08	-1.49034e-05	8.73479e-07	-0.000127184	-0.000127993	-0.000174385	-0.000177383	-0.000192405	-0.000176007	-7.87258e-05	-0.000120746	-7.92417e-05
0.366667	0	-1.45376e-05	3.31618e-07	-0.000135553	-0.000135249	-0.000182136	-0.000188375	-0.000202762	-0.000186833	-8.46386e-05	-0.000126097	-8.55121e-05
0.383333	1.66893e-07	-1.49774e-05	-2.2975e-07	-0.000143898	-0.000142426	-0.000190755	-0.000198674	-0.000213841	-0.000197688	-9.0909e-05	-0.000132764	-9.18107e-05
0.4	2.38419e-07	-1.61742e-05	-7.8895e-07	-0.000151837	-0.000149574	-0.000199837	-0.000208807	-0.000225437	-0.000208469	-9.76324e-05	-0.000140678	-9.81027e-05
0.416667	-1.19209e-07	-1.78038e-05	-1.36115e-06	-0.000158703	-0.000156729	-0.000208728	-0.000219011	-0.000237114	-0.0002191	-0.000104451	-0.000149266	-0.000104388
0.433333	-1.09673e-06	-1.94296e-05	-1.98104e-06	-0.000164759	-0.000163857	-0.000216788	-0.000229573	-0.000248404	-0.00022956	-0.000111151	-0.000157697	-0.000110687
0.45	-2.24114e-06	-2.06868e-05	-2.71581e-06	-0.000170672	-0.000170893	-0.000223651	-0.000240254	-0.000258998	-0.000239879	-0.000117612	-0.000165213	-0.000117044
0.466667	-3.33786e-06	-2.14181e-05	-3.57628e-06	-0.000177085	-0.000177775	-0.000229385	-0.000250697	-0.000268851	-0.00025011	-0.000123882	-0.000171434	-0.000123462
0.483333	-4.1008e-06	-2.1717e-05	-4.53429e-06	-0.000183904	-0.000184515	-0.000234474	-0.00026083	-0.00027818	-0.000260277	-0.000130057	-0.000176501	-0.000129934
0.5	-5.03063e-06	-2.18697e-05	-5.55515e-06	-0.000190985	-0.00019118	-0.000239648	-0.000270772	-0.000287355	-0.000270369	-0.000136161	-0.000181018	-0.000136423
0.516667	-6.36578e-06	-2.2225e-05	-6.6172e-06	-0.000197852	-0.000197871	-0.000245607	-0.000280786	-0.00029674	-0.000280346	-0.000142336	-0.00018581	-0.00014291
0.533333	-7.98702e-06	-2.3047e-05	-7.68575e-06	-0.000204575	-0.00020467	-0.000252757	-0.000290895	-0.000306545	-0.000290147	-0.000148654	-0.000191597	-0.000149371
0.55	-9.46522e-06	-2.44058e-05	-8.73913e-06	-0.000211251	-0.000211578	-0.000261053	-0.000300908	-0.000316748	-0.000299755	-0.000155234	-0.000198714	-0.00015578
0.566667	-1.03712e-05	-2.61474e-05	-9.73181e-06	-0.000218046	-0.000218525	-0.000270018	-0.000310516	-0.000327112	-0.000309203	-0.000162101	-0.000206974	-0.00016214
0.583333	-1.09911e-05	-2.79512e-05	-1.06075e-05	-0.000225151	-0.000225441	-0.000278915	-0.000319815	-0.000337288	-0.000318529	-0.000169015	-0.000215743	-0.000168469
0.6	-1.18017e-05	-2.94495e-05	-1.13509e-05	-0.000232303	-0.000232269	-0.000287026	-0.000328755	-0.000346956	-0.000327776	-0.00017581	-0.000224182	-0.000174813
0.616667	-1.28508e-05	-3.03635e-05	-1.19491e-05	-0.000239551	-0.000239005	-0.000293919	-0.000337386	-0.000355957	-0.000336931	-0.000182223	-0.00023157	-0.000181198
0.633333	-1.38283e-05	-3.06048e-05	-1.24389e-05	-0.000246656	-0.000245642	-0.000299605	-0.000345945	-0.000364353	-0.000345963	-0.000188112	-0.000237585	-0.000187622
0.65	-1.42574e-05	-3.0304e-05	-1.28746e-05	-0.000253499	-0.000252194	-0.000304525	-0.000354624	-0.000372399	-0.000354858	-0.000193834	-0.000242425	-0.00019404
0.666667	-1.37329e-05	-2.97607e-05	-1.32799e-05	-0.000259984	-0.000258668	-0.000309377	-0.000363422	-0.000380443	-0.000363643	-0.000199676	-0.00024673	-0.000200393
0.683333	-1.32084e-05	-2.9333e-05	-1.36787e-05	-0.000266087	-0.000265077	-0.00031485	-0.000372481	-0.000388788	-0.000372356	-0.000205946	-0.000251336	-0.000206648
0.7	-1.29461e-05	-2.93107e-05	-1.40429e-05	-0.000271952	-0.000271426	-0.000321354	-0.000381494	-0.000397578	-0.000381012	-0.000212574	-0.000256945	-0.000212806
0.716667	-1.33753e-05	-2.98182e-05	-1.43701e-05	-0.000277579	-0.000277696	-0.000328876	-0.000390244	-0.000406742	-0.000389589	-0.000219321	-0.000263854	-0.000218883
0.733333	-1.42574e-05	-3.07822e-05	-1.47018e-05	-0.000283325	-0.000283878	-0.000336988	-0.000398755	-0.000416029	-0.00039804	-0.00022583	-0.00027183	-0.000224902
0.75	-1.48296e-05	-3.19728e-05	-1.50919e-05	-0.000289261	-0.000290009	-0.000345021	-0.000407147	-0.000425109	-0.000406363	-0.000231981	-0.000280193	-0.000230835
0.766667	-1.5378e-05	-3.31006e-05	-1.56099e-05	-0.000295651	-0.00029615	-0.00035233	-0.000415659	-0.000433711	-0.000414608	-0.000237823	-0.00028807	-0.000236644
0.783333	-1.58072e-05	-3.39305e-05	-1.62211e-05	-0.000302136	-0.000302366	-0.000358549	-0.00042398	-0.000441729	-0.000422844	-0.000243545	-0.000294715	-0.000242283
0.8	-1.64509e-05	-3.43696e-05	-1.69147e-05	-0.000308526	-0.000308664	-0.000363737	-0.000431728	-0.000449277	-0.000431139	-0.000249076	-0.000299795	-0.000247741
0.816667	-1.74761e-05	-3.44967e-05	-1.76191e-05	-0.000314653	-0.000315009	-0.000368352	-0.000438905	-0.000456649	-0.00043952	-0.000254321	-0.000303511	-0.000253012
0.833333	-1.8549e-05	-3.45254e-05	-1.83127e-05	-0.000320947	-0.000321311	-0.00037308	-0.000446177	-0.000464216	-0.000447975	-0.00025909	-0.000306518	-0.00025811
0.85	-1.94311e-05	-3.47163e-05	-1.90258e-05	-0.000327528	-0.000327539	-0.00037856	-0.000454116	-0.000472291	-0.000456487	-0.000263572	-0.000309675	-0.000263052
0.866667	-1.99318e-05	-3.52743e-05	-1.97692e-05	-0.000334466	-0.000333668	-0.000385134	-0.00046308	-0.000481014	-0.000465012	-0.000267983	-0.000313727	-0.000267853
0.883333	-2.05755e-05	-3.62717e-05	-2.05777e-05	-0.000341237	-0.000339711	-0.000392706	-0.000472736	-0.000490302	-0.00047354	-0.000272608	-0.000319017	-0.00027253
0.9	-2.11239e-05	-3.7625e-05	-2.14533e-05	-0.000347364	-0.000345689	-0.000400762	-0.00048244	-0.000499878	-0.000482074	-0.000277305	-0.00032537	-0.000277101
0.916667	-2.18868e-05	-3.91338e-05	-2.23918e-05	-0.000352657	-0.000351595	-0.000408564	-0.000491762	-0.000509373	-0.00049065	-0.000281906	-0.000332164	-0.00028159
0.933333	-2.26736e-05	-4.05658e-05	-2.33932e-05	-0.000357759	-0.000357375	-0.000415412	-0.000500774	-0.000518458	-0.000499272	-0.000286341	-0.000338571	-0.000286005
0.95	-2.35558e-05	-4.17516e-05	-2.44704e-05	-0.000363076	-0.000362961	-0.000420913	-0.000509429	-0.000526957	-0.000507925	-0.000290632	-0.000343881	-0.000290338
0.966667	-2.47002e-05	-4.26539e-05	-2.56408e-05	-0.000368607	-0.000368278	-0.000425119	-0.000517798	-0.000534905	-0.000516538	-0.000294995	-0.00034777	-0.000294577
0.983333	-2.6083e-05	-4.3382e-05	-2.69023e-05	-0.000374281	-0.000373328	-0.000428506	-0.000525594	-0.000542522	-0.000525056	-0.000299358	-0.000350421	-0.000298708
1	-2.77996e-05	-4.41467e-05	-2.82656e-05	-0.000379622	-0.000378204	-0.000431793	-0.000533247	-0.000550125	-0.00053344	-0.000303698	-0.000352455	-0.00030274
1.01667	-2.95639e-05	-4.51725e-05	-2.9707e-05	-0.000384533	-0.000382994	-0.000435666	-0.000541019	-0.000558006	-0.000541713	-0.000307655	-0.000354683	-0.000306665
1.03333	-3.12805e-05	-4.66021e-05	-3.11982e-05	-0.000388968	-0.000387706	-0.000440519	-0.000549293	-0.000566322	-0.000549915	-0.000311232	-0.000357796	-0.000310475
1.05	-3.28064e-05	-4.84308e-05	-3.26829e-05	-0.00039295	-0.000392286	-0.00044631	-0.000557828	-0.000575044	-0.000558079	-0.000314617	-0.000362098	-0.000314156
1.06667	-3.44515e-05	-5.04967e-05	-3.41134e-05	-0.000396788	-0.000396671	-0.000452581	-0.000566435	-0.000583978	-0.000566244	-0.00031805	-0.000367385	-0.000317682
1.08333	-3.61204e-05	-5.25329e-05	-3.54463e-05	-0.000401008	-0.000400854	-0.000458639	-0.00057466	-0.000592846	-0.000574461	-0.000321651	-0.000373031	-0.000321063
1.1	-3.77417e-05	-5.42618e-05	-3.66666e-05	-0.000405347	-0.000404903	-0.000463826	-0.000582767	-0.000601401	-0.000582747	-0.000325084	-0.00037822	-0.000324301
1.11667	-3.90768e-05	-5.5498e-05	-3.78067e-05	-0.000409591	-0.00040888	-0.000467778	-0.000590992	-0.000609521	-0.000591081	-0.000328255	-0.000382271	-0.00032744
1.13333	-3.98874e-05	-5.62196e-05	-3.89034e-05	-0.000413454	-0.000412842	-0.000470564	-0.000599241	-0.000617256	-0.000599404	-0.000331116	-0.000384892	-0.000330518
1.15	-4.04358e-05	-5.65816e-05	-4.00088e-05	-0.000416839	-0.000416791	-0.000472667	-0.00060761	-0.000624803	-0.00060766	-0.000333786	-0.000386302	-0.000333554
1.16667	-4.07457e-05	-5.68645e-05	-4.11489e-05	-0.000420296	-0.000420682	-0.000474801	-0.000615978	-0.000632422	-0.000615824	-0.000336552	-0.000387146	-0.000336537
1.18333	-4.12226e-05	-5.73775e-05	-4.23366e-05	-0.000424159	-0.000424447	-0.000477635	-0.000624394	-0.000640331	-0.000623931	-0.000339317	-0.000388255	-0.000339408
1.2	-4.21047e-05	-5.83501e-05	-4.35721e-05	-0.000428283	-0.000428062	-0.00048154	-0.000632691	-0.000648609	-0.000631987	-0.000342178	-0.000390328	-0.000342155
1.21667	-4.33445e-05	-5.98523e-05	-4.48314e-05	-0.000432551	-0.000431537	-0.000486444	-0.000640845	-0.000657167	-0.000639965	-0.000345087	-0.000393671	-0.000344799
1.23333	-4.49658e-05	-6.17724e-05	-4.61167e-05	-0.000436389	-0.00043492	-0.000491857	-0.000648642	-0.000665766	-0.000647831	-0.00034802	-0.000398077	-0.000347395
1.25	-4.69923e-05	-6.3859e-05	-4.73976e-05	-0.000439584	-0.000438249	-0.000497058	-0.000656247	-0.000674114	-0.000655545	-0.000350857	-0.000402909	-0.000349983
1.26667	-4.91858e-05	-6.58121e-05	-4.87068e-05	-0.000442421	-0.000441528	-0.000501366	-0.000663829	-0.000681966	-0.000663107	-0.000353241	-0.000407341	-0.000352536
1.28333	-5.13315e-05	-6.73887e-05	-5.00246e-05	-0.000445116	-0.000444732	-0.000504404	-0.000671387	-0.000689216	-0.000670541	-0.000355291	-0.000410673	-0.000355012
1.3	-5.29289e-05	-6.84837e-05	-5.1325e-05	-0.00044781	-0.000447862	-0.000506244	-0.000678754	-0.000695936	-0.000677872	-0.000357342	-0.000412593	-0.000357361
1.31667	-5.40257e-05	-6.9159e-05	-5.25691e-05	-0.000450671	-0.000450903	-0.000507386	-0.000685763	-0.000702339	-0.000685079	-0.000359678	-0.000413294	-0.000359583
1.33333	-5.45263e-05	-6.96087e-05	-5.37395e-05	-0.00045346	-0.000453874	-0.000508569	-0.000692463	-0.000708697	-0.000692134	-0.000362253	-0.000413394	-0.000361687
1.35	-5.51462e-05	-7.00787e-05	-5.48016e-05	-0.000456369	-0.000456807	-0.000510502	-0.000699163	-0.000715234	-0.000698974	-0.000364637	-0.000413694	-0.000363681
1.36667	-5.57184e-05	-7.07696e-05	-5.57553e-05	-0.000459397	-0.000459724	-0.000513598	-0.000706172	-0.000722039	-0.000705559	-0.000366545	-0.000414871	-0.000365561
1.38333	-5.64098e-05	-7.17613e-05	-5.66071e-05	-0.000462711	-0.000462657	-0.000517825	-0.000713325	-0.000729036	-0.000711911	-0.000368023	-0.000417215	-0.000367316
1.4	-5.70297e-05	-7.29877e-05	-5.73895e-05	-0.000466001	-0.000465641	-0.000522726	-0.00072012	-0.000736016	-0.000718121	-0.000369525	-0.000420516	-0.000368931
1.41667	-5.78404e-05	-7.42701e-05	-5.80983e-05	-0.000469077	-0.000468693	-0.000527597	-0.000726247	-0.000742728	-0.000724307	-0.00037117	-0.000424152	-0.000370409
1.43333	-5.86748e-05	-7.53941e-05	-5.88005e-05	-0.000471842	-0.000471832	-0.000531761	-0.000731492	-0.000748983	-0.000730545	-0.000372791	-0.000427327	-0.000371762
1.45	-5.96762e-05	-7.62012e-05	-5.95158e-05	-0.000474513	-0.000475046	-0.000534827	-0.00073626	-0.000754741	-0.000736833	-0.000373912	-0.000429387	-0.000373041
1.46667	-6.07014e-05	-7.66582e-05	-6.02961e-05	-0.000477374	-0.000478299	-0.000536843	-0.000741267	-0.000760134	-0.000743101	-0.000374603	-0.000430078	-0.000374319
1.48333	-6.15358e-05	-7.68773e-05	-6.11674e-05	-0.00048064	-0.000481539	-0.000538271	-0.000747061	-0.000765429	-0.00074928	-0.000375104	-0.000429656	-0.000375648
1.5	-6.18219e-05	-7.7079e-05	-6.21297e-05	-0.00048424	-0.000484745	-0.000539813	-0.000753808	-0.00077093	-0.000755358	-0.000375938	-0.000428801	-0.000377024
1.51667	-6.22511e-05	-7.7513e-05	-6.31441e-05	-0.000487983	-0.000487955	-0.000542138	-0.00076108	-0.000776869	-0.00076137	-0.000377131	-0.000428365	-0.000378429
1.53333	-6.3014e-05	-7.83655e-05	-6.41909e-05	-0.000491726	-0.000491204	-0.000545622	-0.000768328	-0.000783315	-0.000767389	-0.000378704	-0.000429056	-0.000379846
1.55	-6.43015e-05	-7.96908e-05	-6.52682e-05	-0.000495184	-0.000494511	-0.000550199	-0.000775123	-0.000790147	-0.000773484	-0.000380611	-0.000431169	-0.000381288
1.56667	-6.59943e-05	-8.13914e-05	-6.64017e-05	-0.000498354	-0.000497845	-0.000555385	-0.000781298	-0.000797095	-0.000779677	-0.000382638	-0.000434477	-0.000382779
1.58333	-6.76155e-05	-8.32552e-05	-6.76133e-05	-0.000501263	-0.000501144	-0.000560453	-0.000786972	-0.000803841	-0.000785914	-0.000384665	-0.000438307	-0.000384324
1.6	-6.89983e-05	-8.50354e-05	-6.89441e-05	-0.000504386	-0.000504367	-0.000564713	-0.000792384	-0.000810131	-0.000792133	-0.00038662	-0.0004418	-0.000385859
1.61667	-7.01904e-05	-8.65427e-05	-7.0366e-05	-0.000507581	-0.00050752	-0.000567769	-0.000797701	-0.000815871	-0.000798269	-0.000388384	-0.00044422	-0.000387361
1.63333	-7.15256e-05	-8.77131e-05	-7.18442e-05	-0.000510895	-0.000510618	-0.00056967	-0.000803304	-0.000821161	-0.000804277	-0.000389767	-0.00044524	-0.000388826
1.65	-7.31707e-05	-8.86276e-05	-7.33376e-05	-0.000514042	-0.000513698	-0.000570895	-0.000809383	-0.000826255	-0.000810153	-0.000391007	-0.000445049	-0.00039027
1.66667	-7.48634e-05	-8.94748e-05	-7.48092e-05	-0.000516927	-0.000516788	-0.000572169	-0.000815678	-0.000831467	-0.000815953	-0.000392103	-0.000444285	-0.000391724
1.68333	-7.64608e-05	-9.04712e-05	-7.62441e-05	-0.000519693	-0.00051992	-0.000574193	-0.00082221	-0.000837055	-0.000821746	-0.000392818	-0.000443785	-0.000393163
1.7	-7.78914e-05	-9.17703e-05	-7.76313e-05	-0.000522673	-0.000523065	-0.000577376	-0.000828576	-0.000843126	-0.000827616	-0.000393653	-0.000444269	-0.000394546
1.71667	-7.92742e-05	-9.33962e-05	-7.89794e-05	-0.000525796	-0.000526197	-0.000581687	-0.000834417	-0.000849599	-0.000833592	-0.000394821	-0.000446066	-0.000395829
1.73333	-8.07285e-05	-9.52261e-05	-8.02539e-05	-0.000529063	-0.000529303	-0.000586665	-0.000839758	-0.000856246	-0.00083963	-0.00039649	-0.000448995	-0.000397043
1.75	-8.21829e-05	-9.70304e-05	-8.14481e-05	-0.000532353	-0.000532401	-0.000591598	-0.000845099	-0.000862777	-0.000845677	-0.000398636	-0.000452434	-0.000398215
1.76667	-8.33988e-05	-9.85553e-05	-8.25557e-05	-0.000535715	-0.000535517	-0.000595796	-0.000850701	-0.000868961	-0.000851718	-0.000400496	-0.000455566	-0.000399425
1.78333	-8.42571e-05	-9.96169e-05	-8.35852e-05	-0.000538981	-0.000538667	-0.000598851	-0.000856948	-0.000874713	-0.00085775	-0.000401831	-0.000457692	-0.000400734
1.8	-8.50201e-05	-0.00010017	-8.45237e-05	-0.000542033	-0.000541803	-0.000600787	-0.000863433	-0.00088013	-0.000863777	-0.000402498	-0.000458499	-0.000402147
1.81667	-8.55446e-05	-0.00010033	-8.53647e-05	-0.000545061	-0.000544909	-0.000602051	-0.000869727	-0.00088545	-0.000869818	-0.000403118	-0.000458186	-0.000403612
1.83333	-8.63075e-05	-0.000100332	-8.61081e-05	-0.000548112	-0.000547965	-0.00060333	-0.000875902	-0.000890961	-0.000875907	-0.000403905	-0.000457387	-0.000405065
1.85	-8.70466e-05	-0.000100446	-8.67692e-05	-0.000551212	-0.000550958	-0.000605286	-0.000882125	-0.000896883	-0.000882049	-0.000405407	-0.000456932	-0.00040646
1.86667	-8.77857e-05	-0.000100891	-8.74389e-05	-0.000554335	-0.000553843	-0.000608293	-0.000888562	-0.000903276	-0.000888231	-0.000407219	-0.000457536	-0.000407841
1.88333	-8.82149e-05	-0.000101753	-8.81867e-05	-0.000557172	-0.000556581	-0.000612285	-0.00089488	-0.000910006	-0.000894349	-0.000409198	-0.000459521	-0.000409245
1.9	-8.85248e-05	-0.000102966	-8.90277e-05	-0.000559962	-0.000559169	-0.000616776	-0.000900865	-0.000916785	-0.000900321	-0.000410938	-0.000462699	-0.000410728
1.91667	-8.89063e-05	-0.000104347	-8.99597e-05	-0.00056268	-0.000561613	-0.000621036	-0.00090673	-0.000923266	-0.000906095	-0.000412464	-0.000466443	-0.000412286
1.93333	-8.94547e-05	-0.000105669	-9.0909e-05	-0.000565279	-0.000563937	-0.000624369	-0.000912666	-0.000929168	-0.000911665	-0.00041399	-0.000469921	-0.000413934
1.95	-9.0766e-05	-0.000106755	-9.18627e-05	-0.000567448	-0.000566148	-0.000626373	-0.000918698	-0.000934366	-0.000917055	-0.000415683	-0.000472413	-0.000415637
1.96667	-9.24826e-05	-0.00010754	-9.28229e-05	-0.000569093	-0.000568224	-0.0006271	-0.000924254	-0.000938936	-0.000922283	-0.00041728	-0.00047358	-0.000417352
1.98333	-9.42707e-05	-0.000108096	-9.38372e-05	-0.0005705	-0.000570175	-0.000627037	-0.000929117	-0.000943118	-0.000927364	-0.000418806	-0.000473586	-0.000419003
2	-9.57966e-05	-0.000108596	-9.49188e-05	-0.000571954	-0.000572006	-0.000626928	-0.000933242	-0.000947224	-0.000932299	-0.00042026	-0.000473031	-0.000420553
2.01667	-9.67503e-05	-0.000109237	-9.60307e-05	-0.000573671	-0.000573753	-0.0006275	-0.000937176	-0.000951523	-0.000937059	-0.000422025	-0.000472713	-0.000421997
2.03333	-9.7537e-05	-0.000110153	-9.71296e-05	-0.000575531	-0.000575442	-0.00062919	-0.00094142	-0.000956141	-0.00094161	-0.000424147	-0.000473321	-0.000423362
2.05	-9.83477e-05	-0.000111357	-9.8118e-05	-0.000577176	-0.000577115	-0.00063199	-0.000946069	-0.000961024	-0.000945965	-0.000426078	-0.000475165	-0.000424688
2.06667	-9.93729e-05	-0.000112726	-9.89849e-05	-0.00057863	-0.000578806	-0.000635456	-0.000950766	-0.000965971	-0.000950194	-0.000427365	-0.000478057	-0.000426017
2.08333	-0.000100422	-0.000114043	-9.97349e-05	-0.000580108	-0.000580503	-0.000638879	-0.000955153	-0.000970723	-0.000954392	-0.000427985	-0.000481386	-0.000427337
2.1	-0.000101137	-0.000115082	-0.000100385	-0.000581896	-0.000582182	-0.000641558	-0.000959086	-0.000975076	-0.000958644	-0.000428343	-0.000484349	-0.000428642
2.11667	-0.000101543	-0.000115696	-0.000101018	-0.000583851	-0.000583799	-0.00064307	-0.000962734	-0.00097897	-0.000962964	-0.00042901	-0.000486269	-0.000429906
2.13333	-0.000101638	-0.000115881	-0.00010166	-0.000585854	-0.000585338	-0.000643426	-0.000966597	-0.000982522	-0.000967329	-0.000430274	-0.000486859	-0.000431121
2.15	-0.000102019	-0.000115786	-0.000102336	-0.00058769	-0.000586825	-0.000643064	-0.000970769	-0.000985988	-0.00097169	-0.000431895	-0.000486339	-0.000432314
2.16667	-0.00010252	-0.000115669	-0.000103034	-0.000589168	-0.000588297	-0.000642677	-0.000975299	-0.000989667	-0.000976016	-0.000433326	-0.000485364	-0.000433543
2.18333	-0.000102949	-0.0001158	-0.000103736	-0.000590432	-0.000589749	-0.000642945	-0.00098002	-0.000993783	-0.000980304	-0.000434613	-0.000484781	-0.000434856
2.2	-0.000103712	-0.000116367	-0.000104449	-0.000591457	-0.00059114	-0.000644273	-0.000984693	-0.000998394	-0.000984569	-0.000435925	-0.000485312	-0.000436286
2.21667	-0.000104594	-0.000117403	-0.000105186	-0.000592458	-0.000592424	-0.000646632	-0.000989437	-0.001	-0.000988833	-0.000437522	-0.000487283	-0.000437836
2.23333	-0.000105786	-0.00011877	-0.000105951	-0.000593531	-0.000593592	-0.000649569	-0.000994039	-0.00101	-0.000993068	-0.000439191	-0.0004905	-0.000439464
2.25	-0.00010705	-0.000120202	-0.00010669	-0.000594819	-0.000594676	-0.000652386	-0.000998354	-0.00101	-0.000997236	-0.000440884	-0.000494319	-0.00044112
2.26667	-0.000108147	-0.0001214	-0.000107355	-0.000596082	-0.000595738	-0.000654404	-0.00100231	-0.00102	-0.001	-0.000442433	-0.000497884	-0.000442802
2.28333	-0.000108981	-0.000122134	-0.000107934	-0.000597203	-0.000596808	-0.000655233	-0.00100601	-0.00102	-0.00101	-0.000444078	-0.000500449	-0.000444492
2.3	-0.000109649	-0.000122323	-0.000108411	-0.000597966	-0.000597894	-0.000654924	-0.00100963	-0.00102	-0.00101	-0.000446057	-0.000501643	-0.000446159
2.31667	-0.000110054	-0.000122056	-0.000108808	-0.000598705	-0.00059898	-0.000653959	-0.00101318	-0.00103	-0.00101	-0.000448179	-0.000501608	-0.000447746
2.33333	-0.000110149	-0.000121561	-0.000109126	-0.000599611	-0.000600066	-0.000653071	-0.00101662	-0.00103	-0.00102	-0.00045011	-0.000500926	-0.000449219
2.35	-0.000109839	-0.000121111	-0.000109382	-0.000600851	-0.000601163	-0.000652973	-0.00101979	-0.00103	-0.00102	-0.000451827	-0.000500389	-0.000450559
2.36667	-0.000109315	-0.000120931	-0.000109564	-0.00060221	-0.00060229	-0.000654088	-0.00102303	-0.00104	-0.00102	-0.00045321	-0.000500689	-0.000451758
2.38333	-0.000108957	-0.000121114	-0.000109668	-0.000603402	-0.000603484	-0.000656392	-0.00102682	-0.00104	-0.00103	-0.000454259	-0.000502153	-0.000452839
2.4	-0.000108957	-0.000121596	-0.000109692	-0.000604403	-0.000604759	-0.000659423	-0.0010313	-0.00105	-0.00103	-0.000454974	-0.000504615	-0.000453836
2.41667	-0.000109291	-0.000122188	-0.000109668	-0.000605476	-0.000606103	-0.000662456	-0.00103619	-0.00105	-0.00104	-0.000455403	-0.000507491	-0.000454779
2.43333	-0.000109863	-0.000122658	-0.000109664	-0.000606883	-0.000607488	-0.000664787	-0.00104089	-0.00106	-0.00104	-0.000455618	-0.000510011	-0.000455716
2.45	-0.000110149	-0.000122822	-0.000109729	-0.00060848	-0.000608879	-0.000665992	-0.00104518	-0.00106	-0.00104	-0.000455618	-0.000511527	-0.000456678
2.46667	-0.000110126	-0.00012262	-0.0001099	-0.00061034	-0.000610281	-0.000666096	-0.00104923	-0.00106	-0.00105	-0.000455976	-0.00051178	-0.00045769
2.48333	-0.000109911	-0.00012214	-0.000110117	-0.000611985	-0.00061172	-0.000665558	-0.00105338	-0.00107	-0.00105	-0.000457025	-0.000511013	-0.000458776
2.5	-0.000109792	-0.000121579	-0.000110334	-0.000613487	-0.000613229	-0.0006651	-0.00105751	-0.00107	-0.00106	-0.000458551	-0.000509891	-0.000459953
2.51667	-0.000110102	-0.000121169	-0.000110503	-0.000614846	-0.000614809	-0.000665426	-0.00106151	-0.00107	-0.00106	-0.00046041	-0.000509262	-0.000461236
2.53333	-0.000110555	-0.000121082	-0.000110555	-0.000616157	-0.000616426	-0.000666954	-0.00106525	-0.00108	-0.00106	-0.000462413	-0.000509832	-0.000462645
2.55	-0.000111198	-0.000121362	-0.000110544	-0.000617635	-0.000618065	-0.000669652	-0.00106885	-0.00108	-0.00107	-0.000464344	-0.0005119	-0.000464201
2.56667	-0.000111342	-0.000121908	-0.000110535	-0.000619233	-0.000619688	-0.00067305	-0.00107262	-0.00109	-0.00107	-0.000466204	-0.000515237	-0.000465896
2.58333	-0.000111342	-0.000122516	-0.000110598	-0.000620997	-0.00062132	-0.000676417	-0.00107653	-0.00109	-0.00108	-0.00046792	-0.000519168	-0.000467678
2.6	-0.000111151	-0.000122959	-0.00011078	-0.000622857	-0.000622961	-0.000679035	-0.00108023	-0.00109	-0.00108	-0.000469518	-0.000522815	-0.000469518
2.61667	-0.000110436	-0.000123083	-0.000111053	-0.000624669	-0.000624621	-0.00068048	-0.00108378	-0.0011	-0.00108	-0.000471115	-0.00052543	-0.00047139
2.63333	-0.00011003	-0.000122875	-0.000111378	-0.000626504	-0.000626312	-0.00068078	-0.00108721	-0.0011	-0.00109	-0.000472736	-0.000526669	-0.000473285
2.65	-0.00011003	-0.000122472	-0.00011171	-0.000628197	-0.000628033	-0.000680407	-0.00109088	-0.0011	-0.00109	-0.00047462	-0.000526719	-0.00047519
2.66667	-0.000110602	-0.000122117	-0.000112061	-0.000629938	-0.00062978	-0.000680104	-0.00109472	-0.00111	-0.0011	-0.000476623	-0.000526224	-0.000477056
2.68333	-0.000111795	-0.000122066	-0.000112453	-0.000631535	-0.00063157	-0.000680597	-0.00109859	-0.00111	-0.0011	-0.000478792	-0.000526039	-0.000478866
2.7	-0.000113106	-0.000122486	-0.000112919	-0.000633109	-0.000633432	-0.000682326	-0.00110245	-0.00111	-0.0011	-0.00048101	-0.000526903	-0.000480661
2.71667	-0.000114131	-0.000123382	-0.000113472	-0.000634754	-0.000635363	-0.000685273	-0.00110633	-0.00112	-0.00111	-0.000483251	-0.000529163	-0.000482507
2.73333	-0.000114846	-0.000124588	-0.000114059	-0.000636566	-0.000637335	-0.000688971	-0.00111036	-0.00112	-0.00111	-0.000485301	-0.000532639	-0.000484475
2.75	-0.000115204	-0.000125808	-0.000114614	-0.000638449	-0.000639297	-0.000692678	-0.00111444	-0.00113	-0.00111	-0.000486732	-0.000536703	-0.000486571
2.76667	-0.000115657	-0.000126726	-0.000115044	-0.00064069	-0.000641217	-0.00069566	-0.00111861	-0.00113	-0.00112	-0.000487828	-0.000540515	-0.000488741
2.78333	-0.000116277	-0.00012711	-0.000115347	-0.000643337	-0.000643127	-0.000697464	-0.00112259	-0.00114	-0.00112	-0.000489259	-0.000543353	-0.000490926
2.8	-0.000116515	-0.000126897	-0.000115531	-0.000645912	-0.000645067	-0.000698089	-0.00112638	-0.00114	-0.00113	-0.000491428	-0.000544887	-0.000493089
2.81667	-0.000116491	-0.000126218	-0.00011565	-0.000648201	-0.000647019	-0.000697974	-0.00112996	-0.00114	-0.00113	-0.000494385	-0.000545308	-0.00049525
2.83333	-0.000116134	-0.00012535	-0.000115739	-0.000649774	-0.000648931	-0.000697824	-0.00113327	-0.00114	-0.00113	-0.000497675	-0.000545248	-0.000497426
2.85	-0.000115323	-0.000124621	-0.000115817	-0.000651062	-0.000650736	-0.00069833	-0.00113645	-0.00115	-0.00114	-0.000500488	-0.00054554	-0.000499669
2.86667	-0.000115132	-0.000124295	-0.000115863	-0.00065254	-0.000652351	-0.00069989	-0.00113974	-0.00115	-0.00114	-0.000502825	-0.000546887	-0.000501977
2.88333	-0.000115132	-0.000124482	-0.000115878	-0.000654447	-0.000653747	-0.000702448	-0.00114319	-0.00115	-0.00114	-0.000504804	-0.000549582	-0.000504284
2.9	-0.000115442	-0.000125106	-0.000115954	-0.000656235	-0.000654946	-0.000705499	-0.00114684	-0.00116	-0.00115	-0.000507021	-0.000553388	-0.000506514
2.91667	-0.000115824	-0.000125944	-0.000116132	-0.000657594	-0.00065596	-0.000708278	-0.00115056	-0.00116	-0.00115	-0.000509238	-0.000557615	-0.000508595
2.93333	-0.000116062	-0.000126711	-0.00011642	-0.000658309	-0.000656797	-0.000710048	-0.00115473	-0.00117	-0.00116	-0.000511408	-0.000561374	-0.0005105
2.95	-0.000116158	-0.000127171	-0.000116816	-0.000658453	-0.000657469	-0.000710374	-0.00115907	-0.00117	-0.00116	-0.00051322	-0.000563911	-0.000512277
2.96667	-0.000116444	-0.000127222	-0.000117209	-0.000658691	-0.000657967	-0.000709302	-0.0011632	-0.00117	-0.00116	-0.000514627	-0.000564893	-0.000513968
2.98333	-0.00011735	-0.000126932	-0.000117553	-0.000659096	-0.000658283	-0.000707343	-0.00116715	-0.00118	-0.00117	-0.000515962	-0.000564538	-0.000515608
3	-0.000118446	-0.000126501	-0.000117811	-0.000659359	-0.00065847	-0.000705291	-0.0011708	-0.00118	-0.00117	-0.000517273	-0.000563531	-0.000517171
3.01667	-0.000119305	-0.000126178	-0.000117998	-0.000658977	-0.000658557	-0.000703927	-0.00117416	-0.00118	-0.00117	-0.000518632	-0.000562771	-0.000518643
3.03333	-0.000119686	-0.000126156	-0.000118154	-0.000658453	-0.000658591	-0.000703733	-0.00117748	-0.00119	-0.00118	-0.000520039	-0.00056303	-0.000520002
3.05	-0.000119448	-0.000126496	-0.000118332	-0.000658023	-0.000658602	-0.000704716	-0.00118093	-0.00119	-0.00118	-0.000521421	-0.00056466	-0.000521253
3.06667	-0.000118923	-0.000127094	-0.000118525	-0.000657928	-0.000658581	-0.000706413	-0.00118468	-0.0012	-0.00119	-0.000522852	-0.000567458	-0.000522423
3.08333	-0.00011828	-0.000127725	-0.000118672	-0.000658286	-0.000658522	-0.000708077	-0.00118878	-0.0012	-0.00119	-0.000524211	-0.000570745	-0.000523494
3.1	-0.000117874	-0.00012813	-0.00011872	-0.000658548	-0.000658453	-0.000708972	-0.00119297	-0.0012	-0.00119	-0.000525427	-0.00057362	-0.000524499
3.11667	-0.000117779	-0.000128117	-0.000118685	-0.000658691	-0.000658481	-0.000708666	-0.00119698	-0.00121	-0.0012	-0.000526357	-0.00057531	-0.00052546
3.13333	-0.000118113	-0.000127645	-0.000118585	-0.000658572	-0.000658637	-0.000707206	-0.00120096	-0.00121	-0.0012	-0.000526977	-0.00057546	-0.000526387
3.15	-0.000118566	-0.000126843	-0.000118481	-0.000658453	-0.000658949	-0.00070512	-0.00120494	-0.00121	-0.00121	-0.000527501	-0.000574273	-0.000527287
3.16667	-0.000118971	-0.000125973	-0.00011844	-0.000658453	-0.000659426	-0.000703225	-0.00120902	-0.00122	-0.00121	-0.00052774	-0.000572439	-0.000528108
3.18333	-0.000118971	-0.00012533	-0.00011849	-0.000658596	-0.000660083	-0.000702336	-0.00121346	-0.00122	-0.00121	-0.000528336	-0.000570872	-0.00052883
3.2	-0.000118923	-0.000125134	-0.0001186	-0.000659287	-0.000660967	-0.000702959	-0.00121834	-0.00123	-0.00122	-0.000529194	-0.000570368	-0.000529426
3.21667	-0.000118589	-0.00012545	-0.000118763	-0.000660169	-0.00066209	-0.000705112	-0.00122368	-0.00123	-0.00122	-0.000530243	-0.000571301	-0.000529942
3.23333	-0.000118303	-0.000126159	-0.000118938	-0.000661457	-0.000663479	-0.000708318	-0.00122924	-0.00124	-0.00123	-0.000531316	-0.000573482	-0.000530447
3.25	-0.00011847	-0.000127003	-0.00011909	-0.000663173	-0.000665115	-0.00071179	-0.00123453	-0.00124	-0.00123	-0.000531888	-0.000576229	-0.000530984
3.26667	-0.000118828	-0.00012768	-0.000119229	-0.00066551	-0.000666964	-0.000714726	-0.00123939	-0.00125	-0.00124	-0.00053215	-0.000578629	-0.000531591
3.28333	-0.00011909	-0.000127958	-0.000119391	-0.000668275	-0.000668988	-0.000716606	-0.00124383	-0.00125	-0.00124	-0.000531983	-0.000579883	-0.000532207
3.3	-0.000119567	-0.000127759	-0.000119569	-0.000671041	-0.000671139	-0.000717383	-0.00124824	-0.00126	-0.00125	-0.000532031	-0.000579605	-0.000532744
3.31667	-0.000120044	-0.000127188	-0.000119771	-0.000673854	-0.000673419	-0.000717492	-0.00125289	-0.00126	-0.00125	-0.000532532	-0.000577975	-0.000533123
3.33333	-0.000120235	-0.000126491	-0.000119966	-0.000676453	-0.000675801	-0.000717663	-0.00125763	-0.00127	-0.00126	-0.000533414	-0.000575664	-0.000533299
3.35	-0.000120497	-0.000125956	-0.000120113	-0.00067879	-0.00067825	-0.000718641	-0.0012625	-0.00127	-0.00126	-0.000534415	-0.000573577	-0.000533355
3.36667	-0.000120759	-0.000125805	-0.000120198	-0.000680864	-0.000680725	-0.000720881	-0.00126722	-0.00127	-0.00127	-0.000535107	-0.000572507	-0.000533377
3.38333	-0.000120878	-0.000126104	-0.000120267	-0.000682938	-0.000683185	-0.000724372	-0.00127191	-0.00128	-0.00127	-0.000535107	-0.000572831	-0.000533436
3.4	-0.000120807	-0.000126736	-0.000120326	-0.000685251	-0.000685658	-0.000728626	-0.00127676	-0.00129	-0.00128	-0.000534415	-0.000574369	-0.000533533
3.41667	-0.000120449	-0.000127446	-0.000120386	-0.000687659	-0.000688138	-0.00073287	-0.00128193	-0.00129	-0.00128	-0.000533247	-0.000576452	-0.000533616
3.43333	-0.000120091	-0.00012794	-0.000120466	-0.000690115	-0.000690633	-0.000736331	-0.00128741	-0.0013	-0.00129	-0.000532508	-0.000578185	-0.000533633
3.45	-0.000119758	-0.000127999	-0.000120544	-0.000692737	-0.000693132	-0.000738533	-0.00129321	-0.0013	-0.00129	-0.000532389	-0.000578797	-0.000533579
3.46667	-0.000119853	-0.000127568	-0.000120583	-0.000695336	-0.000695624	-0.000739481	-0.00129924	-0.00131	-0.0013	-0.000532627	-0.000577942	-0.000533481
3.48333	-0.000120211	-0.000126782	-0.000120605	-0.000698245	-0.000698104	-0.000739657	-0.00130506	-0.00131	-0.0013	-0.000533104	-0.000575847	-0.000533427
3.5	-0.000120711	-0.000125922	-0.000120638	-0.000701129	-0.000700536	-0.00073983	-0.00131059	-0.00132	-0.00131	-0.000533438	-0.000573227	-0.000533475
3.51667	-0.000121117	-0.000125309	-0.000120724	-0.000703895	-0.000702909	-0.000740759	-0.00131576	-0.00132	-0.00131	-0.000533605	-0.000571026	-0.000533644
3.53333	-0.000121355	-0.000125188	-0.000120896	-0.000706279	-0.000705219	-0.000742895	-0.00132065	-0.00133	-0.00132	-0.000533819	-0.000570054	-0.000533919
3.55	-0.000121188	-0.000125638	-0.000121164	-0.000708282	-0.000707454	-0.000746202	-0.00132546	-0.00133	-0.00132	-0.000534034	-0.00057068	-0.000534242
3.56667	-0.000121117	-0.000126537	-0.000121505	-0.000710213	-0.000709613	-0.000750163	-0.00133004	-0.00134	-0.00133	-0.000534511	-0.000572683	-0.000534574
3.58333	-0.000121164	-0.000127613	-0.000121877	-0.000712001	-0.000711689	-0.000753977	-0.0013345	-0.00134	-0.00133	-0.00053494	-0.000575337	-0.000534914
3.6	-0.000121403	-0.000128545	-0.000122283	-0.000713766	-0.000713683	-0.000756864	-0.0013391	-0.00135	-0.00134	-0.000535107	-0.000577673	-0.000535291
3.61667	-0.000121975	-0.000129084	-0.000122727	-0.00071553	-0.000715606	-0.000758375	-0.00134394	-0.00135	-0.00134	-0.000535536	-0.000578853	-0.000535705
3.63333	-0.000122714	-0.00012915	-0.000123202	-0.000717318	-0.000717498	-0.000758565	-0.0013489	-0.00136	-0.00135	-0.000535941	-0.000578479	-0.000536151
3.65	-0.000123596	-0.000128859	-0.000123739	-0.000719082	-0.000719405	-0.000757986	-0.00135364	-0.00136	-0.00135	-0.000536275	-0.000576746	-0.000536587
3.66667	-0.000124312	-0.000128482	-0.000124305	-0.000721085	-0.000721317	-0.000757478	-0.00135784	-0.00136	-0.00136	-0.000536847	-0.000574364	-0.000536977
3.68333	-0.00012517	-0.000128337	-0.000124886	-0.000723064	-0.000723235	-0.000757851	-0.00136149	-0.00137	-0.00136	-0.000537586	-0.000572287	-0.0005373
3.7	-0.000126004	-0.000128671	-0.000125475	-0.000725043	-0.000725108	-0.000759567	-0.00136466	-0.00137	-0.00136	-0.000538158	-0.00057134	-0.000537564
3.71667	-0.000126576	-0.000129561	-0.000126121	-0.000727093	-0.00072687	-0.000762554	-0.00136781	-0.00137	-0.00137	-0.000538731	-0.000571906	-0.000537757
3.73333	-0.000127101	-0.000130885	-0.000126854	-0.000729263	-0.00072845	-0.000766214	-0.00137096	-0.00138	-0.00137	-0.000538826	-0.000573771	-0.000537913
3.75	-0.000127339	-0.000132368	-0.000127667	-0.000731242	-0.000729833	-0.000769642	-0.0013741	-0.00138	-0.00137	-0.000538802	-0.000576204	-0.000538089
3.76667	-0.000127554	-0.000133687	-0.00012854	-0.000733101	-0.000731029	-0.000771955	-0.00137737	-0.00138	-0.00138	-0.000538492	-0.000578236	-0.000538284
3.78333	-0.000127888	-0.000134596	-0.000129411	-0.000734365	-0.000732052	-0.000772624	-0.00138049	-0.00139	-0.00138	-0.000538015	-0.000579036	-0.000538477
3.8	-0.00012908	-0.000135018	-0.000130233	-0.000734913	-0.000732961	-0.000771682	-0.00138326	-0.00139	-0.00138	-0.000537658	-0.000578232	-0.000538646
3.81667	-0.000130773	-0.000135078	-0.000131052	-0.000734699	-0.000733793	-0.000769716	-0.00138547	-0.00139	-0.00138	-0.000537658	-0.000576066	-0.000538763
3.83333	-0.000132537	-0.000135052	-0.000131891	-0.000734294	-0.000734582	-0.000767661	-0.00138733	-0.00139	-0.00139	-0.000538206	-0.00057331	-0.000538889
3.85	-0.00013392	-0.000135258	-0.000132788	-0.000734246	-0.000735343	-0.000766461	-0.00138907	-0.00139	-0.00139	-0.000538993	-0.000570982	-0.00053906
3.86667	-0.000134754	-0.000135927	-0.000133744	-0.000734317	-0.000736071	-0.000766726	-0.00139129	-0.0014	-0.00139	-0.000539708	-0.000569963	-0.000539316
3.88333	-0.00013504	-0.000137113	-0.000134733	-0.000735033	-0.000736806	-0.000768518	-0.00139377	-0.0014	-0.00139	-0.000540018	-0.000570665	-0.000539702
3.9	-0.000135589	-0.000138659	-0.000135658	-0.000736249	-0.000737621	-0.000771344	-0.00139654	-0.0014	-0.0014	-0.000540018	-0.000572873	-0.000540235
3.91667	-0.000136328	-0.000140253	-0.000136473	-0.000737941	-0.000738609	-0.000774357	-0.00139921	-0.00141	-0.0014	-0.000540209	-0.000575828	-0.000540905
3.93333	-0.00013721	-0.000141546	-0.000137158	-0.00073961	-0.000739823	-0.000776686	-0.00140202	-0.00141	-0.0014	-0.000540686	-0.000578515	-0.000541655
3.95	-0.000138068	-0.000142283	-0.000137771	-0.000741112	-0.000741244	-0.000777778	-0.00140488	-0.00141	-0.0014	-0.000541306	-0.000580051	-0.000542446
3.96667	-0.00013876	-0.000142409	-0.000138378	-0.000742447	-0.000742868	-0.000777615	-0.00140784	-0.00141	-0.00141	-0.000542259	-0.000580026	-0.000543263
3.98333	-0.00013926	-0.000142092	-0.00013907	-0.000743878	-0.000744628	-0.000776716	-0.0014106	-0.00141	-0.00141	-0.000543523	-0.000578662	-0.00054413
4	-0.000139737	-0.000141671	-0.000139833	-0.000745571	-0.000746472	-0.00077594	-0.00141332	-0.00142	-0.00141	-0.000545025	-0.000576727	-0.000545092
4.01667	-0.000140071	-0.000141532	-0.000140656	-0.000747645	-0.000748356	-0.000776148	-0.00141578	-0.00142	-0.00142	-0.000546455	-0.000575242	-0.000546174
4.03333	-0.000140667	-0.000141971	-0.000141499	-0.000749886	-0.000750274	-0.000777864	-0.00141792	-0.00142	-0.00142	-0.000547695	-0.000575087	-0.000547377
4.05	-0.00014143	-0.000143075	-0.000142327	-0.000752175	-0.000752233	-0.000781065	-0.00142009	-0.00142	-0.00142	-0.000548697	-0.000576654	-0.000548655
4.06667	-0.000142646	-0.000144698	-0.00014311	-0.000754392	-0.000754253	-0.000785175	-0.00142217	-0.00143	-0.00142	-0.000549555	-0.000579685	-0.000549921
4.08333	-0.000143981	-0.000146506	-0.000143897	-0.000756538	-0.000756323	-0.000789279	-0.00142443	-0.00143	-0.00142	-0.000550604	-0.000583362	-0.000551076
4.1	-0.000145388	-0.000148103	-0.000144731	-0.00075866	-0.00075843	-0.000792467	-0.00142684	-0.00143	-0.00143	-0.000552106	-0.000586606	-0.000552121
4.11667	-0.000146484	-0.000149175	-0.000145643	-0.00076071	-0.000760556	-0.000794182	-0.00142922	-0.00143	-0.00143	-0.000553918	-0.000588489	-0.000553097
4.13333	-0.000147176	-0.000149606	-0.000146601	-0.000762665	-0.000762693	-0.000794435	-0.00143158	-0.00144	-0.00143	-0.000555372	-0.000588582	-0.000554078
4.15	-0.000147367	-0.000149514	-0.000147555	-0.000764668	-0.000764846	-0.000793803	-0.00143375	-0.00144	-0.00143	-0.000556183	-0.000587131	-0.000555136
4.16667	-0.000147915	-0.000149204	-0.000148416	-0.000766647	-0.000767018	-0.000793218	-0.00143588	-0.00144	-0.00144	-0.000556231	-0.000584964	-0.000556278
4.18333	-0.000148916	-0.000149048	-0.000149133	-0.000768745	-0.000769202	-0.000793604	-0.00143788	-0.00144	-0.00144	-0.000556517	-0.000583185	-0.000557449
4.2	-0.000150108	-0.000149338	-0.000149699	-0.000771034	-0.000771372	-0.000795518	-0.00143988	-0.00144	-0.00144	-0.000557184	-0.000582754	-0.000558554
4.21667	-0.000151205	-0.000150174	-0.000150167	-0.000773394	-0.00077349	-0.00079893	-0.00144188	-0.00144	-0.00144	-0.000558496	-0.000584125	-0.000559545
4.23333	-0.00015192	-0.000151432	-0.000150635	-0.00077585	-0.000775518	-0.000803215	-0.00144386	-0.00145	-0.00144	-0.000560331	-0.000587072	-0.000560464
4.25	-0.000152111	-0.000152806	-0.000151198	-0.000778282	-0.000777411	-0.000807379	-0.00144589	-0.00145	-0.00145	-0.00056212	-0.000590764	-0.000561417
4.26667	-0.000151873	-0.000153942	-0.000151851	-0.000780571	-0.000779164	-0.000810425	-0.00144761	-0.00145	-0.00145	-0.000563478	-0.000594088	-0.000562503
4.28333	-0.00015161	-0.000154574	-0.000152549	-0.000782526	-0.000780774	-0.000811727	-0.00144894	-0.00145	-0.00145	-0.000564265	-0.000596064	-0.000563686
4.3	-0.000151634	-0.000154639	-0.000153258	-0.000784004	-0.000782255	-0.000811263	-0.00145028	-0.00145	-0.00145	-0.000564814	-0.000596221	-0.000564896
4.31667	-0.000152326	-0.000154309	-0.000153966	-0.000784981	-0.000783618	-0.000809626	-0.00145202	-0.00145	-0.00145	-0.000565481	-0.000594773	-0.000566032
4.33333	-0.000153565	-0.00015393	-0.000154688	-0.000785482	-0.000784834	-0.000807805	-0.00145435	-0.00146	-0.00146	-0.000566673	-0.000592538	-0.000567003
4.35	-0.000155091	-0.000153889	-0.000155419	-0.000785935	-0.000785887	-0.000806805	-0.00145733	-0.00146	-0.00146	-0.000568175	-0.000590616	-0.000567811
4.36667	-0.000156593	-0.000154467	-0.000156177	-0.000786459	-0.000786759	-0.000807277	-0.00146046	-0.00146	-0.00146	-0.000569534	-0.000589966	-0.000568496
4.38333	-0.000157905	-0.000155717	-0.000156977	-0.000787318	-0.000787511	-0.000809265	-0.00146337	-0.00146	-0.00146	-0.000570488	-0.000591024	-0.00056911
4.4	-0.000159001	-0.00015744	-0.000157818	-0.000788391	-0.000788204	-0.000812195	-0.00146565	-0.00147	-0.00146	-0.000570989	-0.000593527	-0.000569673
4.41667	-0.00015986	-0.000159247	-0.000158648	-0.000789225	-0.000788885	-0.000815097	-0.00146708	-0.00147	-0.00146	-0.000571013	-0.000596606	-0.000570163
4.43333	-0.000160146	-0.000160704	-0.000159439	-0.000789869	-0.000789557	-0.00081698	-0.00146773	-0.00147	-0.00147	-0.000571013	-0.000599116	-0.000570514
4.45	-0.000160217	-0.000161495	-0.000160185	-0.000790155	-0.000790185	-0.000817215	-0.00146806	-0.00147	-0.00147	-0.000571013	-0.00060008	-0.000570735
4.46667	-0.000160408	-0.000161544	-0.000160898	-0.000790799	-0.000790751	-0.000815784	-0.00146868	-0.00147	-0.00147	-0.000571013	-0.000599077	-0.000570891
4.48333	-0.000160885	-0.000161051	-0.000161596	-0.000791633	-0.000791254	-0.000813294	-0.00146966	-0.00147	-0.00147	-0.000571013	-0.000596432	-0.000571091
4.5	-0.000161457	-0.000160418	-0.000162257	-0.000792468	-0.000791718	-0.00081075	-0.00147076	-0.00147	-0.00147	-0.000570869	-0.000593117	-0.00057142
4.51667	-0.000162268	-0.000160098	-0.000162853	-0.000792873	-0.000792166	-0.000809175	-0.00147176	-0.00147	-0.00147	-0.000570536	-0.000590408	-0.000571947
4.53333	-0.000163293	-0.000160421	-0.000163416	-0.000792849	-0.000792611	-0.000809215	-0.00147269	-0.00147	-0.00147	-0.000570607	-0.00058942	-0.000572695
4.55	-0.000164437	-0.000161461	-0.000163958	-0.000792682	-0.000793035	-0.000810889	-0.001474	-0.00147	-0.00148	-0.000571251	-0.000590701	-0.000573687
4.56667	-0.000165582	-0.000162991	-0.000164446	-0.000792849	-0.00079338	-0.00081357	-0.00147581	-0.00148	-0.00148	-0.000572681	-0.000594023	-0.000574936
4.58333	-0.000166273	-0.00016456	-0.000164814	-0.000793493	-0.000793612	-0.000816224	-0.00147817	-0.00148	-0.00148	-0.000574613	-0.000598473	-0.000576427
4.6	-0.000166416	-0.000165647	-0.000165025	-0.00079416	-0.00079374	-0.000817793	-0.00148063	-0.00148	-0.00148	-0.000576806	-0.000602794	-0.000578141
4.61667	-0.000166345	-0.00016585	-0.000165027	-0.000794756	-0.000793822	-0.000817602	-0.00148249	-0.00148	-0.00148	-0.000579238	-0.000605856	-0.000580062
4.63333	-0.000166178	-0.00016503	-0.000164791	-0.000794828	-0.00079387	-0.000815613	-0.00148361	-0.00148	-0.00148	-0.000581932	-0.000607074	-0.000582144
4.65	-0.000165772	-0.00016336	-0.000164312	-0.00079459	-0.000793855	-0.000812436	-0.00148408	-0.00148	-0.00148	-0.000584745	-0.00060662	-0.000584329
4.66667	-0.000164938	-0.00016126	-0.000163603	-0.000794184	-0.000793688	-0.000809094	-0.00148427	-0.00148	-0.00148	-0.000587416	-0.000605342	-0.000586521
4.68333	-0.00016377	-0.000159238	-0.000162719	-0.000793874	-0.000793254	-0.000806615	-0.00148468	-0.00148	-0.00148	-0.000589728	-0.000604416	-0.000588625
4.7	-0.000162292	-0.0001577	-0.000161698	-0.000793779	-0.000792474	-0.000805623	-0.00148525	-0.00148	-0.00149	-0.00059166	-0.000604873	-0.000590585
4.71667	-0.000160694	-0.000156795	-0.000160529	-0.000793374	-0.00079131	-0.000806079	-0.00148616	-0.00148	-0.00149	-0.000593519	-0.00060718	-0.000592351
4.73333	-0.000159168	-0.000156368	-0.000159188	-0.000792515	-0.000789802	-0.000807272	-0.00148685	-0.00149	-0.00149	-0.000595284	-0.000611027	-0.000593912
4.75	-0.000157785	-0.000156022	-0.000157684	-0.000791013	-0.000788013	-0.000808075	-0.00148726	-0.00149	-0.00149	-0.000596786	-0.000615424	-0.000595242
4.76667	-0.000156546	-0.000155277	-0.000156065	-0.000788724	-0.000785991	-0.000807368	-0.00148718	-0.00149	-0.00149	-0.000597763	-0.000619056	-0.000596291
4.78333	-0.000155187	-0.000153769	-0.000154376	-0.000785577	-0.000783739	-0.000804473	-0.00148664	-0.00149	-0.00149	-0.000598359	-0.000620782	-0.000597054
4.8	-0.000153494	-0.000151397	-0.00015267	-0.000781953	-0.000781214	-0.000799428	-0.0014859	-0.00149	-0.00149	-0.000598669	-0.000620067	-0.000597522
4.81667	-0.00015142	-0.000148378	-0.000150978	-0.000778234	-0.000778425	-0.000792998	-0.00148497	-0.00148	-0.00149	-0.000599098	-0.0006172	-0.000597689
4.83333	-0.000149226	-0.000145169	-0.000149291	-0.00077492	-0.000775401	-0.000786409	-0.0014843	-0.00148	-0.00149	-0.000599384	-0.000613199	-0.000597579
4.85	-0.000147128	-0.000142294	-0.000147596	-0.00077194	-0.000772202	-0.000780896	-0.00148416	-0.00148	-0.00149	-0.000598955	-0.000609433	-0.000597243
4.86667	-0.000145197	-0.000140141	-0.000145826	-0.000769103	-0.000768882	-0.000777245	-0.00148444	-0.00148	-0.00148	-0.000598121	-0.000607114	-0.000596744
4.88333	-0.000143528	-0.000138795	-0.000143905	-0.000766003	-0.000765466	-0.00077549	-0.00148485	-0.00148	-0.00148	-0.000596809	-0.000606834	-0.00059612
4.9	-0.000142074	-0.000137992	-0.000141785	-0.000762689	-0.000761948	-0.000774891	-0.00148487	-0.00148	-0.00148	-0.000595355	-0.00060834	-0.000595368
4.91667	-0.000140619	-0.000137198	-0.000139449	-0.000759256	-0.000758302	-0.000774195	-0.00148459	-0.00148	-0.00148	-0.000594068	-0.000610628	-0.000594438
4.93333	-0.000139141	-0.000135803	-0.000136926	-0.000755823	-0.00075447	-0.000772101	-0.00148375	-0.00148	-0.00148	-0.00059309	-0.000612326	-0.000593326
4.95	-0.000137067	-0.000133348	-0.000134254	-0.000752199	-0.000750367	-0.000767739	-0.00148301	-0.00148	-0.00148	-0.000592279	-0.000612222	-0.000592102
4.96667	-0.000134063	-0.000129708	-0.000131477	-0.000748003	-0.000745915	-0.000760996	-0.00148256	-0.00148	-0.00148	-0.000591493	-0.00060974	-0.000590799
4.98333	-0.000130177	-0.000125154	-0.000128627	-0.000743258	-0.000741058	-0.000752552	-0.00148284	-0.00148	-0.00148	-0.000590396	-0.00060517	-0.000589427
5	-0.000125718	-0.00012027	-0.000125707	-0.000738132	-0.000735735	-0.000743607	-0.00148358	-0.00148	-0.00148	-0.00058887	-0.000599561	-0.000587932
5.01667	-0.000121474	-0.00011575	-0.000122745	-0.000732768	-0.000729872	-0.00073541	-0.00148449	-0.00148	-0.00149	-0.000587153	-0.000594321	-0.0005862
5.03333	-0.000117731	-0.000112148	-0.000119738	-0.000726807	-0.000723387	-0.000728749	-0.00148521	-0.00148	-0.00149	-0.000585485	-0.000590652	-0.000584106
5.05	-0.000114656	-0.000109674	-0.000116721	-0.000720131	-0.000716235	-0.000723613	-0.00148609	-0.00148	-0.00149	-0.000583792	-0.000589053	-0.000581555
5.06667	-0.000112176	-0.000108116	-0.000113756	-0.000712574	-0.000708427	-0.000719146	-0.00148675	-0.00148	-0.00149	-0.000581718	-0.000589082	-0.000578512
5.08333	-0.000109959	-0.000106923	-0.000110899	-0.000704134	-0.000699992	-0.000713939	-0.00148778	-0.00149	-0.00149	-0.000578904	-0.000589479	-0.000574999
5.1	-0.000108028	-0.000105417	-0.000108199	-0.000694764	-0.000690953	-0.000706552	-0.00148914	-0.00149	-0.00149	-0.000575018	-0.000588614	-0.000571069
5.11667	-0.000106072	-0.000103069	-0.000105661	-0.000684488	-0.000681328	-0.000696084	-0.00149107	-0.00149	-0.00149	-0.000570059	-0.000585116	-0.000566769
5.13333	-0.000103879	-9.97198e-05	-0.000103248	-0.000673521	-0.00067121	-0.000682583	-0.00149336	-0.00149	-0.00149	-0.000564218	-0.000578431	-0.000562117
5.15	-0.000101447	-9.56552e-05	-0.000100858	-0.000662124	-0.000660711	-0.000667121	-0.00149567	-0.00149	-0.0015	-0.000558019	-0.000569101	-0.000557115
5.16667	-9.8753e-05	-9.14937e-05	-9.82957e-05	-0.000650466	-0.000649937	-0.000651495	-0.00149803	-0.00149	-0.0015	-0.000551748	-0.000558624	-0.000551688
5.18333	-9.60112e-05	-8.78922e-05	-9.52504e-05	-0.000638711	-0.000638894	-0.000637609	-0.00150013	-0.00149	-0.0015	-0.000545645	-0.000548909	-0.000545649
5.2	-9.35555e-05	-8.5151e-05	-9.11994e-05	-0.000626886	-0.000627391	-0.000626733	-0.00150216	-0.00149	-0.0015	-0.000539851	-0.000541481	-0.000538622
5.21667	-9.11951e-05	-8.28373e-05	-8.52997e-05	-0.000615513	-0.000614863	-0.000618835	-0.00150394	-0.0015	-0.0015	-0.00053432	-0.000536677	-0.000529918
5.23333	-8.83579e-05	-7.954e-05	-7.62896e-05	-0.000604641	-0.000600109	-0.000612199	-0.0015048	-0.0015	-0.00149	-0.000528765	-0.000533085	-0.000518298
5.25	-8.39949e-05	-7.28426e-05	-6.23508e-05	-0.000594056	-0.000580921	-0.000603414	-0.00150318	-0.00149	-0.00148	-0.000522018	-0.000527403	-0.00050165
5.26667	-7.64608e-05	-5.95359e-05	-4.11533e-05	-0.000582659	-0.000553865	-0.000587729	-0.00149765	-0.00148	-0.00146	-0.000512481	-0.00051477	-0.000476785
5.28333	-6.3467e-05	-3.60249e-05	-1.00201e-05	-0.000568235	-0.000514491	-0.000559666	-0.00148583	-0.00146	-0.00143	-0.000497723	-0.000489469	-0.000439557
5.3	-4.11749e-05	1.15783e-06	3.36776e-05	-0.000546682	-0.000457971	-0.000513723	-0.00146456	-0.00142	-0.00139	-0.00047431	-0.000445807	-0.000385449
5.31667	-4.76837e-06	5.4847e-05	9.19905e-05	-0.000511229	-0.000380045	-0.000445013	-0.0014292	-0.00137	-0.00133	-0.000436401	-0.000378949	-0.000310534
5.33333	5.18799e-05	0.000126842	0.00016597	-0.000451052	-0.000277852	-0.000349754	-0.00137324	-0.00129	-0.00125	-0.000374889	-0.000285527	-0.000212232
5.35	0.00013442	0.000217667	0.000255511	-0.000352848	-0.000150305	-0.000225574	-0.00128925	-0.0012	-0.00116	-0.000278235	-0.000163931	-8.97473e-05
5.36667	0.000246453	0.000326501	0.000359513	-0.0002056	2.06875e-06	-7.16876e-05	-0.00117233	-0.00108	-0.00105	-0.000136137	-1.43314e-05	5.61563e-05
5.38333	0.00038712	0.000451259	0.000476128	-5.16176e-06	0.000177556	0.000110999	-0.00102265	-0.000953349	-0.000923133	5.5337e-05	0.000161484	0.000223596
5.4	0.000550246	0.000588768	0.000602956	0.000241673	0.000373616	0.000319816	-0.00084753	-0.00080795	-0.000788901	0.00028975	0.000360317	0.000409954
5.41667	0.000725412	0.000735007	0.000737119	0.000519478	0.000586931	0.000550307	-0.000659275	-0.000652317	-0.000646472	0.000552559	0.000577732	0.000611934
5.43333	0.00090096	0.000885385	0.000875228	0.000808966	0.000813138	0.00079632	-0.000471211	-0.000491377	-0.000499335	0.00082531	0.000808193	0.000825338
5.45	0.00106757	0.00104	0.00101	0.00109345	0.00105	0.00105	-0.000293469	-0.000330545	-0.000351539	0.00109246	0.00105	0.00104
5.46667	0.0012193	0.00118	0.00115	0.00136212	0.00128	0.0013	-0.00013175	-0.000175272	-0.000207476	0.00134411	0.00128	0.00126
5.48333	0.00135393	0.00131	0.00127	0.00160998	0.00151	0.00155	1.19925e-05	-3.0511e-05	-7.13673e-05	0.00157564	0.00151	0.00148
5.5	0.00147102	0.00143	0.00139	0.00183524	0.00172	0.00178	0.00013752	9.98204e-05	5.33798e-05	0.00178537	0.00172	0.00168
5.51667	0.00157108	0.00154	0.00149	0.00203723	0.00192	0.00198	0.000245261	0.000213261	0.000164624	0.00197256	0.00192	0.00186
5.53333	0.00165532	0.00163	0.00158	0.00221554	0.0021	0.00217	0.000336504	0.000309008	0.000261569	0.00213699	0.00209	0.00203
5.55	0.00172472	0.0017	0.00166	0.00237056	0.00226	0.00232	0.000412369	0.000387822	0.000344459	0.00227933	0.00223	0.00218
5.56667	0.00178092	0.00176	0.00172	0.00250331	0.0024	0.00246	0.000474548	0.000451655	0.000414105	0.00240083	0.00236	0.00231
5.58333	0.00182519	0.00181	0.00177	0.00261568	0.00252	0.00257	0.000524688	0.000503074	0.000471568	0.00250318	0.00246	0.00242
5.6	0.00185921	0.00184	0.00181	0.00270957	0.00263	0.00266	0.000564408	0.000544631	0.00051801	0.00258794	0.00254	0.00251
5.61667	0.00188453	0.00187	0.00185	0.00278667	0.00271	0.00275	0.000595188	0.000578355	0.000554672	0.00265684	0.00261	0.00259
5.63333	0.0019026	0.00189	0.00187	0.0028489	0.00278	0.00282	0.000618315	0.000605483	0.000582823	0.00271154	0.00267	0.00265
5.65	0.00191472	0.00191	0.00189	0.00289818	0.00284	0.00287	0.00063436	0.000626505	0.000603721	0.00275388	0.00272	0.0027
5.66667	0.00192172	0.00192	0.0019	0.00293602	0.00289	0.00292	0.000644088	0.000641459	0.000618555	0.00278511	0.00276	0.00274
5.68333	0.00192466	0.00193	0.00191	0.00296384	0.00292	0.00296	0.000648379	0.00065037	0.000628387	0.00280662	0.00279	0.00276
5.7	0.00192421	0.00193	0.00191	0.00298277	0.00295	0.00298	0.000648546	0.000653654	0.000634189	0.00281968	0.00281	0.00278
5.71667	0.00192146	0.00193	0.00192	0.00299445	0.00297	0.00299	0.000646162	0.000652338	0.000636851	0.00282586	0.00282	0.0028
5.73333	0.00191748	0.00193	0.00192	0.00300068	0.00298	0.003	0.000642252	0.000648017	0.000637182	0.00282664	0.00282	0.0028
5.75	0.00191338	0.00192	0.00192	0.0030032	0.00299	0.003	0.000637722	0.000642574	0.000635995	0.00282321	0.00282	0.0028
5.76667	0.00191026	0.00192	0.00192	0.00300304	0.00299	0.003	0.000632834	0.000637751	0.000634018	0.00281653	0.0028	0.0028
5.78333	0.00190928	0.00192	0.00192	0.00300053	0.00299	0.003	0.000628233	0.000634755	0.000631954	0.00280721	0.00279	0.00279
5.8	0.00191112	0.00193	0.00193	0.00299584	0.00299	0.003	0.000624466	0.00063404	0.00063039	0.00279522	0.00278	0.00277
5.81667	0.00191655	0.00194	0.00194	0.00298923	0.00299	0.003	0.000621963	0.000635347	0.000629813	0.00277672	0.00276	0.00276
5.83333	0.00192602	0.00195	0.00195	0.00298168	0.00298	0.003	0.000621295	0.000638007	0.00063068	0.00274932	0.00275	0.00274
5.85	0.0019403	0.00197	0.00197	0.00297424	0.00298	0.00299	0.000622344	0.000641382	0.000633448	0.00271454	0.00274	0.00273
5.86667	0.00196033	0.00199	0.00199	0.00296794	0.00297	0.00299	0.000625682	0.000645295	0.000638628	0.00268221	0.00272	0.00271
5.88333	0.00198715	0.00202	0.00203	0.00296332	0.00297	0.00298	0.000631332	0.000650286	0.00064673	0.00266252	0.0027	0.0027
5.9	0.00202203	0.00206	0.00207	0.00296053	0.00297	0.00298	0.00063982	0.000657588	0.000658211	0.00265827	0.00269	0.00269
5.91667	0.00206602	0.0021	0.00212	0.00295955	0.00297	0.00297	0.000651789	0.000668841	0.00067348	0.00266333	0.00267	0.00267
5.93333	0.00212021	0.00216	0.00218	0.00296053	0.00297	0.00297	0.000668168	0.000685638	0.000692929	0.00266664	0.00266	0.00266
5.95	0.0021857	0.00222	0.00225	0.00296351	0.00297	0.00297	0.000689817	0.000709078	0.000716981	0.0026639	0.00265	0.00266
5.96667	0.00226376	0.00231	0.00233	0.0029687	0.00298	0.00298	0.000717354	0.000739498	0.000746007	0.00265605	0.00265	0.00265
5.98333	0.00235596	0.0024	0.00243	0.00297655	0.00299	0.003	0.000750756	0.000776472	0.000780422	0.00264804	0.00265	0.00265
6	0.00246351	0.00252	0.00255	0.00298699	0.003	0.00301	0.000789928	0.000819112	0.000820598	0.00264153	0.00265	0.00265
6.01667	0.00258813	0.00265	0.00269	0.00300008	0.00301	0.00303	0.000835228	0.000866528	0.000866896	0.00263648	0.00266	0.00264
6.03333	0.00273168	0.0028	0.00284	0.0030157	0.00303	0.00304	0.000886917	0.000918314	0.000919674	0.00263259	0.00266	0.00264
6.05	0.00289676	0.00297	0.00302	0.00303379	0.00305	0.00306	0.000944972	0.000974844	0.00097927	0.00262995	0.00265	0.00264
6.06667	0.00308599	0.00317	0.00322	0.00305465	0.00307	0.00308	0.00100989	0.00104	0.00105	0.00262847	0.00265	0.00263
6.08333	0.00330241	0.00339	0.00345	0.00307831	0.00309	0.0031	0.00108175	0.00111	0.00112	0.0026283	0.00264	0.00263
6.1	0.00354888	0.00364	0.00372	0.0031047	0.00312	0.00312	0.00116107	0.00119	0.0012	0.00262945	0.00264	0.00264
6.11667	0.00382843	0.00393	0.00401	0.00313417	0.00315	0.00315	0.00124872	0.00128	0.00129	0.00263195	0.00264	0.00264
6.13333	0.00414462	0.00425	0.00435	0.00316704	0.00319	0.00319	0.00134537	0.00138	0.00139	0.0026355	0.00264	0.00264
6.15	0.00450098	0.00462	0.00472	0.003204	0.00323	0.00323	0.00145197	0.00149	0.00151	0.00264032	0.00265	0.00265
6.16667	0.00490122	0.00504	0.00514	0.00324539	0.00327	0.00328	0.00156937	0.00161	0.00163	0.00264635	0.00266	0.00265
6.18333	0.00534921	0.0055	0.0056	0.00329145	0.00332	0.00333	0.00169818	0.00175	0.00176	0.00265338	0.00268	0.00266
6.2	0.00584836	0.006	0.00612	0.00334228	0.00337	0.00338	0.00183902	0.00189	0.0019	0.00266132	0.00269	0.00267
6.21667	0.00640244	0.00657	0.00669	0.00339802	0.00343	0.00344	0.00199237	0.00204	0.00206	0.0026701	0.0027	0.00268
6.23333	0.00701494	0.00718	0.00732	0.00345925	0.00349	0.00349	0.00215933	0.00221	0.00224	0.00267982	0.0027	0.00269
6.25	0.00768879	0.00786	0.008	0.00352627	0.00356	0.00356	0.00234158	0.00239	0.00243	0.00269055	0.00271	0.0027
6.26667	0.00842607	0.0086	0.00874	0.00359982	0.00363	0.00363	0.00254118	0.00259	0.00264	0.00270297	0.00271	0.00271
6.28333	0.00922778	0.0094	0.00954	0.00368019	0.00371	0.00371	0.00275996	0.00282	0.00287	0.00271745	0.00273	0.00273
6.3	0.0100937	0.01026	0.01041	0.0037676	0.0038	0.0038	0.00299973	0.00307	0.00312	0.00273449	0.00275	0.00275
6.31667	0.0110231	0.01119	0.01133	0.00386189	0.00389	0.0039	0.00326261	0.00334	0.00339	0.00275471	0.00278	0.00277
6.33333	0.0120154	0.01219	0.01232	0.0039627	0.00399	0.00401	0.00355132	0.00364	0.0037	0.00277903	0.00281	0.0028
6.35	0.0130691	0.01324	0.01336	0.00406986	0.0041	0.00412	0.00386918	0.00397	0.00403	0.00280795	0.00285	0.00283
6.36667	0.0141822	0.01434	0.01445	0.00418304	0.00421	0.00423	0.0042197	0.00433	0.0044	0.00284197	0.00289	0.00287
6.38333	0.015351	0.0155	0.0156	0.00430251	0.00433	0.00435	0.00460625	0.00472	0.0048	0.00288167	0.00292	0.00291
6.4	0.0165705	0.0167	0.0168	0.00442823	0.00446	0.00447	0.00503204	0.00515	0.00524	0.00292735	0.00297	0.00296
6.41667	0.0178348	0.01795	0.01804	0.00456046	0.00459	0.00459	0.00550005	0.00562	0.00572	0.00297983	0.00301	0.00302
6.43333	0.0191388	0.01924	0.01933	0.00469917	0.00473	0.00473	0.0060127	0.00614	0.00625	0.00303953	0.00307	0.00308
6.45	0.0204787	0.02057	0.02067	0.00484453	0.00488	0.00488	0.00657215	0.0067	0.00682	0.00310688	0.00313	0.00315
6.46667	0.0218529	0.02195	0.02205	0.00499676	0.00503	0.00503	0.00718014	0.00732	0.00744	0.0031821	0.00321	0.00322
6.48333	0.0232625	0.02337	0.02347	0.00515636	0.0052	0.0052	0.00783913	0.00799	0.00811	0.00326557	0.0033	0.00331
6.5	0.0247114	0.02484	0.02494	0.0053239	0.00537	0.00538	0.00855169	0.00871	0.00883	0.00335753	0.0034	0.0034
6.51667	0.0262057	0.02635	0.02645	0.00549999	0.00555	0.00556	0.00932043	0.00949	0.00961	0.00345833	0.00351	0.0035
6.53333	0.0277517	0.02791	0.02802	0.00568582	0.00574	0.00575	0.0101476	0.01032	0.01044	0.00356801	0.00362	0.00361
6.55	0.0293534	0.02952	0.02963	0.00588237	0.00594	0.00595	0.0110343	0.0112	0.01133	0.00368648	0.00374	0.00373
6.56667	0.0310119	0.03117	0.03129	0.00609094	0.00615	0.00615	0.0119803	0.01214	0.01227	0.00381367	0.00386	0.00386
6.58333	0.0327267	0.03288	0.033	0.00631217	0.00638	0.00637	0.012985	0.01314	0.01327	0.00394933	0.00399	0.00399
6.6	0.0344962	0.03464	0.03478	0.00654689	0.00662	0.0066	0.014047	0.01419	0.01433	0.00409317	0.00412	0.00413
6.61667	0.0363196	0.03646	0.03662	0.00679544	0.00687	0.00685	0.0151651	0.01531	0.01545	0.00424495	0.00427	0.00429
6.63333	0.0381979	0.03835	0.03853	0.00705863	0.00714	0.00712	0.0163379	0.01648	0.01663	0.00440509	0.00444	0.00445
6.65	0.0401347	0.04031	0.04052	0.00733732	0.00743	0.00741	0.0175655	0.01772	0.01787	0.00457392	0.00462	0.00462
6.66667	0.042139	0.04236	0.0426	0.0076331	0.00773	0.00772	0.0188497	0.01903	0.01918	0.0047519	0.0048	0.0048
6.68333	0.0442264	0.04451	0.0448	0.00794793	0.00806	0.00805	0.020196	0.0204	0.02057	0.00493948	0.005	0.005
6.7	0.0464202	0.04679	0.04712	0.00828499	0.00842	0.00839	0.0216128	0.02185	0.02204	0.00513759	0.00521	0.0052
6.71667	0.0487498	0.0492	0.04958	0.00864795	0.0088	0.00876	0.0231122	0.02338	0.02361	0.00534794	0.00542	0.00542
6.73333	0.0512475	0.05178	0.05222	0.00904096	0.00921	0.00916	0.0247089	0.02501	0.02528	0.00557284	0.00564	0.00566
6.75	0.0539456	0.05454	0.05503	0.00946809	0.00966	0.00959	0.026419	0.02675	0.02706	0.00581439	0.00588	0.00591
6.76667	0.0568708	0.05751	0.05803	0.00993344	0.01015	0.01006	0.028259	0.02863	0.02898	0.00607474	0.00614	0.00618
6.78333	0.0600405	0.06068	0.06125	0.0104412	0.01068	0.01058	0.0302445	0.03065	0.03102	0.00635612	0.00643	0.00648
6.8	0.0634612	0.06409	0.06469	0.0109959	0.01126	0.01115	0.0323899	0.03284	0.03321	0.00666149	0.00674	0.00679
6.81667	0.0671309	0.06775	0.06837	0.0116022	0.01189	0.01177	0.0347066	0.03518	0.03554	0.0069941	0.00709	0.00714
6.83333	0.0710442	0.07166	0.0723	0.0122649	0.01258	0.01246	0.0372019	0.03768	0.03801	0.00735679	0.00747	0.00751
6.85	0.0751993	0.07584	0.07651	0.0129895	0.01334	0.01321	0.0398759	0.04033	0.04061	0.00775132	0.00787	0.0079
6.86667	0.079603	0.08031	0.081	0.0137826	0.01417	0.01403	0.0427158	0.04309	0.04332	0.00817769	0.0083	0.00832
6.88333	0.0842737	0.08507	0.08577	0.0146526	0.01507	0.01492	0.0456938	0.04596	0.04612	0.00863411	0.00874	0.00876
6.9	0.0892414	0.09014	0.09082	0.0156086	0.01605	0.01588	0.0487663	0.04888	0.04899	0.0091167	0.0092	0.00922
6.91667	0.0945413	0.09549	0.09613	0.016658	0.0171	0.01693	0.05188	0.05186	0.05193	0.00962026	0.00968	0.00971
6.93333	0.1002	0.10111	0.10166	0.0178043	0.01822	0.01805	0.0549838	0.05486	0.05492	0.0101393	0.01018	0.01021
6.95	0.106215	0.10695	0.10738	0.0190435	0.01941	0.01926	0.0580413	0.05789	0.05796	0.0106695	0.0107	0.01074
6.96667	0.112527	0.11296	0.11323	0.0203629	0.02066	0.02054	0.0610429	0.06095	0.06106	0.0112093	0.01125	0.01129
6.98333	0.119023	0.11907	0.11918	0.0217435	0.02198	0.02188	0.06401	0.06406	0.06425	0.0117605	0.01183	0.01187
7	0.125542	0.12523	0.1252	0.0231643	0.02336	0.02328	0.0669944	0.06725	0.06755	0.0123289	0.01244	0.01249
7.01667	0.131929	0.13139	0.13127	0.0246103	0.02481	0.02473	0.0700715	0.07058	0.071	0.0129243	0.01308	0.01314
7.03333	0.138081	0.13751	0.13739	0.0260788	0.02633	0.02622	0.073331	0.07408	0.07465	0.0135601	0.01375	0.01385
7.05	0.143985	0.1436	0.14356	0.0275816	0.02792	0.02778	0.0768665	0.07782	0.07854	0.0142516	0.01448	0.01461
7.06667	0.149722	0.14968	0.14978	0.0291438	0.0296	0.0294	0.0807626	0.08186	0.08272	0.0150155	0.01527	0.01545
7.08333	0.155443	0.1558	0.15608	0.0307972	0.03138	0.03113	0.0850837	0.08624	0.08722	0.0158677	0.01615	0.01637
7.1	0.161319	0.16204	0.16248	0.0325735	0.03327	0.03297	0.0898655	0.09103	0.09208	0.0168223	0.01712	0.0174
7.11667	0.167495	0.16846	0.16899	0.0344992	0.03529	0.03495	0.0951151	0.09624	0.09734	0.017892	0.01823	0.01854
7.13333	0.174056	0.17509	0.17564	0.0365929	0.03743	0.03708	0.100818	0.10192	0.10301	0.0190896	0.01947	0.0198
7.15	0.181016	0.18196	0.18244	0.0388649	0.03972	0.03938	0.106955	0.10806	0.10911	0.0204292	0.02087	0.0212
7.16667	0.188324	0.18905	0.18939	0.0413184	0.04215	0.04183	0.113512	0.11466	0.11561	0.0219265	0.02241	0.02273
7.18333	0.195883	0.19629	0.19644	0.0439496	0.04472	0.04444	0.120493	0.12167	0.12248	0.0235965	0.02411	0.0244
7.2	0.203571	0.20361	0.20355	0.0467475	0.04742	0.04717	0.127905	0.12903	0.12964	0.0254459	0.02593	0.02619
7.21667	0.211257	0.21091	0.21065	0.0496922	0.05024	0.05003	0.135736	0.13664	0.13701	0.0274672	0.02788	0.02808
7.23333	0.218808	0.21809	0.21769	0.0527533	0.05316	0.05298	0.143919	0.1444	0.14447	0.0296325	0.02991	0.03006
7.25	0.226097	0.2251	0.22464	0.0558935	0.05618	0.05602	0.152301	0.15217	0.15191	0.0318947	0.03202	0.03211
7.26667	0.233019	0.23189	0.23149	0.0590752	0.0593	0.05913	0.160649	0.15982	0.15925	0.0341961	0.03418	0.03422
7.28333	0.239517	0.23851	0.23833	0.0622725	0.06253	0.06233	0.168682	0.16724	0.16641	0.0364815	0.03636	0.03637
7.3	0.245621	0.24506	0.24524	0.0654825	0.06588	0.06562	0.176143	0.17432	0.17335	0.038713	0.03857	0.03855
7.31667	0.251487	0.25168	0.25238	0.0687336	0.06938	0.06903	0.182868	0.18102	0.18007	0.0408792	0.04078	0.04076
7.33333	0.257402	0.2586	0.25993	0.072085	0.07308	0.0726	0.188846	0.18734	0.18658	0.0429956	0.043	0.04301
7.35	0.263768	0.26607	0.26809	0.0756191	0.07703	0.07637	0.194218	0.19335	0.19294	0.0450985	0.04523	0.04531
7.36667	0.271031	0.27436	0.27705	0.0794303	0.08127	0.08043	0.19925	0.19918	0.19925	0.0472355	0.04751	0.04769
7.38333	0.27961	0.28374	0.28703	0.0836134	0.0859	0.08484	0.204266	0.20503	0.20565	0.0494581	0.04987	0.05018
7.4	0.289823	0.29446	0.29821	0.0882581	0.09097	0.08969	0.209594	0.21112	0.21231	0.0518193	0.05237	0.05284
7.41667	0.301864	0.30673	0.31077	0.0934491	0.09658	0.09509	0.215523	0.21769	0.21941	0.0543756	0.05507	0.05572
7.43333	0.315806	0.32067	0.32481	0.0992694	0.1028	0.10111	0.222291	0.22496	0.22716	0.0571908	0.05805	0.05888
7.45	0.331634	0.33634	0.34039	0.105803	0.10968	0.10784	0.230089	0.23315	0.23572	0.0603374	0.06139	0.06239
7.46667	0.349284	0.3537	0.35748	0.113131	0.11729	0.11535	0.239072	0.24242	0.24524	0.063895	0.06515	0.06631
7.48333	0.368654	0.37264	0.37598	0.121323	0.12566	0.12367	0.249359	0.25286	0.25581	0.0679442	0.0694	0.07069
7.5	0.389589	0.39297	0.39569	0.130423	0.1348	0.13283	0.261018	0.26453	0.26746	0.0725588	0.0742	0.07558
7.51667	0.41186	0.41443	0.41639	0.140447	0.1447	0.14282	0.274056	0.27742	0.2802	0.0777998	0.07958	0.08101
7.53333	0.435143	0.4367	0.43777	0.151369	0.15532	0.1536	0.28841	0.29146	0.29396	0.0837111	0.08557	0.087
7.55	0.459032	0.45943	0.45948	0.163134	0.16661	0.16512	0.303952	0.30655	0.30864	0.090318	0.09217	0.09356
7.56667	0.483055	0.48221	0.48114	0.175649	0.17844	0.17727	0.320498	0.32251	0.32405	0.0976201	0.09936	0.10064
7.58333	0.506717	0.50458	0.50231	0.188782	0.19069	0.18992	0.337819	0.33914	0.33999	0.105584	0.10709	0.10818
7.6	0.529515	0.52606	0.52251	0.202359	0.20319	0.20291	0.355649	0.35614	0.35616	0.114132	0.11529	0.11611
7.61667	0.550942	0.54612	0.54123	0.216155	0.21576	0.21604	0.373668	0.37318	0.37222	0.123136	0.12385	0.12431
7.63333	0.570476	0.56418	0.55792	0.229902	0.22819	0.22907	0.391494	0.38984	0.3878	0.132419	0.13261	0.13266
7.65	0.587551	0.57968	0.5721	0.243307	0.24028	0.24176	0.408665	0.40568	0.4025	0.141768	0.1414	0.14101
7.66667	0.601544	0.59205	0.58329	0.256075	0.25182	0.25387	0.424651	0.42022	0.4159	0.150956	0.15006	0.14922
7.68333	0.611804	0.60081	0.59116	0.267938	0.26263	0.26516	0.438873	0.43298	0.42763	0.159766	0.15839	0.15714
7.7	0.617716	0.6056	0.59545	0.278672	0.27254	0.27543	0.450759	0.44355	0.43735	0.168003	0.16623	0.16464
7.71667	0.61882	0.60622	0.59609	0.288105	0.2814	0.28453	0.459796	0.45157	0.4448	0.175513	0.17343	0.1716
7.73333	0.614928	0.60266	0.59313	0.296118	0.28913	0.29235	0.465595	0.4568	0.44979	0.182181	0.1799	0.17791
7.75	0.606216	0.59518	0.58681	0.302647	0.29569	0.29886	0.467949	0.45916	0.45227	0.187939	0.18556	0.1835
7.76667	0.593221	0.58424	0.57754	0.307688	0.3011	0.30408	0.466867	0.45868	0.45229	0.192757	0.19038	0.18834
7.78333	0.576784	0.57053	0.56592	0.311308	0.30545	0.30808	0.462587	0.45557	0.45003	0.196643	0.19437	0.19244
7.8	0.557957	0.55491	0.5527	0.313648	0.30889	0.31101	0.455566	0.45018	0.4458	0.199638	0.19757	0.19583
7.81667	0.537934	0.53838	0.53878	0.314933	0.31163	0.31307	0.446431	0.44296	0.44003	0.201818	0.20007	0.19862
7.83333	0.518015	0.522	0.52511	0.315462	0.31395	0.31454	0.435924	0.43452	0.43326	0.203292	0.20197	0.20095
7.85	0.499567	0.50689	0.51272	0.315602	0.3162	0.31576	0.424843	0.42552	0.42613	0.204219	0.20346	0.203
7.86667	0.483934	0.49414	0.50258	0.315777	0.3188	0.31714	0.414002	0.41675	0.41937	0.204814	0.20477	0.20502
7.88333	0.472314	0.48483	0.49566	0.316471	0.32223	0.3192	0.404214	0.40903	0.41375	0.20536	0.20617	0.2073
7.9	0.465655	0.47993	0.49287	0.318226	0.32701	0.32249	0.396303	0.40323	0.41009	0.206207	0.20804	0.21015
7.91667	0.464654	0.48034	0.49503	0.321655	0.33371	0.32764	0.39112	0.40024	0.40917	0.207771	0.21077	0.21395
7.93333	0.46984	0.48682	0.5028	0.327438	0.3429	0.33529	0.389552	0.40093	0.41177	0.210522	0.21481	0.21909
7.95	0.481694	0.49993	0.51668	0.33631	0.35513	0.34608	0.392495	0.40608	0.41855	0.21497	0.22062	0.22597
7.96667	0.500703	0.52	0.53692	0.349015	0.37093	0.36059	0.400812	0.41638	0.43009	0.221639	0.22863	0.23497
7.98333	0.527287	0.54709	0.56348	0.366257	0.39075	0.37936	0.415252	0.43234	0.4468	0.231045	0.23925	0.24646
8	0.561639	0.58097	0.59608	0.388623	0.41497	0.40281	0.436371	0.45427	0.46895	0.243652	0.25284	0.26077
8.01667	0.603544	0.62106	0.63419	0.416527	0.44388	0.43125	0.464454	0.48225	0.49655	0.259838	0.26969	0.27816
8.03333	0.652255	0.66652	0.67705	0.450175	0.47766	0.46487	0.49945	0.51612	0.52946	0.279857	0.29002	0.29884
8.05	0.706484	0.71626	0.7237	0.489559	0.5164	0.50375	0.540935	0.55546	0.56731	0.303832	0.31397	0.32296
8.06667	0.764502	0.76901	0.77305	0.534492	0.56006	0.54783	0.588109	0.59966	0.60952	0.331761	0.34163	0.3506
8.08333	0.824315	0.82339	0.82389	0.584652	0.60849	0.59695	0.639847	0.6479	0.6554	0.36355	0.37298	0.38174
8.1	0.883869	0.87801	0.87494	0.639647	0.66143	0.65083	0.694806	0.69921	0.70411	0.399045	0.40794	0.41629
8.11667	0.941258	0.93145	0.92488	0.69905	0.71851	0.70909	0.751565	0.75255	0.75473	0.438053	0.44635	0.45409
8.13333	0.994886	0.98235	0.97239	0.762413	0.77925	0.77125	0.808763	0.80681	0.80631	0.480339	0.48795	0.4949
8.15	1.04356	1.02933	1.01615	0.829248	0.8431	0.8367	0.865205	0.86092	0.85788	0.525625	0.53241	0.53842
8.16667	1.08649	1.07105	1.05479	0.898991	0.90943	0.9048	0.919918	0.91383	0.90851	0.57356	0.57934	0.58432
8.18333	1.12312	1.10615	1.08691	0.970968	0.97757	0.9748	0.972142	0.96459	0.95729	0.623721	0.62832	0.63223
8.2	1.1529	1.13328	1.11115	1.04438	1.0468	1.04595	1.02128	1.01237	1.00335	0.675623	0.67891	0.68176
8.21667	1.17495	1.15114	1.12632	1.11834	1.11639	1.11745	1.06682	1.05641	1.0459	0.728747	0.73067	0.73251
8.23333	1.18782	1.15858	1.1315	1.19191	1.18562	1.18853	1.10826	1.0961	1.08417	0.782582	0.7832	0.78409
8.25	1.18947	1.15474	1.12621	1.26413	1.25377	1.25843	1.14501	1.13085	1.11744	0.836654	0.83609	0.83607
8.26667	1.17763	1.13916	1.11044	1.33414	1.32013	1.32645	1.17637	1.1601	1.14505	0.890547	0.88899	0.88805
8.28333	1.15061	1.11191	1.08465	1.40118	1.38404	1.3919	1.20153	1.18327	1.16641	0.943893	0.94153	0.93962
8.3	1.10811	1.07367	1.04966	1.46462	1.44492	1.45418	1.2196	1.19972	1.181	0.996363	0.99332	0.99039
8.31667	1.05184	1.02576	1.00658	1.52396	1.5022	1.51271	1.22971	1.20872	1.18833	1.04764	1.04396	1.03997
8.33333	0.985317	0.97005	0.95679	1.57882	1.55541	1.567	1.23117	1.20955	1.18785	1.09741	1.09301	1.08798
8.35	0.913051	0.90883	0.90192	1.62893	1.60412	1.61658	1.22365	1.20148	1.17899	1.14532	1.14005	1.13405
8.36667	0.839436	0.84462	0.84383	1.67406	1.64795	1.6611	1.20714	1.18399	1.16123	1.19101	1.18465	1.17778
8.38333	0.767978	0.77993	0.78452	1.71398	1.68656	1.70026	1.18178	1.15679	1.13438	1.23409	1.22645	1.2188
8.4	0.701064	0.71707	0.72596	1.74845	1.71964	1.73381	1.14736	1.12006	1.0988	1.27414	1.26511	1.25671
8.41667	0.640127	0.65793	0.66994	1.77721	1.74692	1.76157	1.10299	1.07447	1.05555	1.31072	1.30034	1.29111
8.43333	0.58591	0.6039	0.61783	1.79993	1.76816	1.78336	1.04753	1.02128	1.00618	1.34337	1.33185	1.32158
8.45	0.53865	0.5558	0.57054	1.81628	1.78315	1.79901	0.981045	0.96226	0.95253	1.37165	1.35927	1.34771
8.46667	0.498182	0.51395	0.52851	1.82591	1.79175	1.80831	0.906175	0.89965	0.89639	1.39512	1.38216	1.36901
8.48333	0.464041	0.4782	0.49179	1.82855	1.79382	1.81099	0.8283	0.83591	0.83941	1.41338	1.39989	1.38498
8.5	0.435585	0.44807	0.46015	1.82405	1.78924	1.8068	0.753897	0.77353	0.78309	1.42601	1.41169	1.39495
8.51667	0.412098	0.42289	0.43315	1.81242	1.77787	1.79548	0.688156	0.71479	0.7289	1.43261	1.41667	1.39817
8.53333	0.392845	0.40186	0.41024	1.79385	1.75958	1.77686	0.633463	0.66153	0.67828	1.43266	1.41391	1.39384
8.55	0.377087	0.38421	0.39077	1.76858	1.73437	1.75097	0.589596	0.615	0.63259	1.42541	1.40264	1.38135
8.56667	0.364068	0.36919	0.3741	1.73673	1.70256	1.71804	0.554984	0.57581	0.59283	1.4097	1.38235	1.36051
8.58333	0.353016	0.35614	0.3596	1.69808	1.66489	1.67864	0.52789	0.54392	0.55947	1.38385	1.35297	1.3317
8.6	0.343168	0.34449	0.34672	1.65214	1.62248	1.63369	0.506873	0.51878	0.5323	1.34612	1.31498	1.29583
8.61667	0.333846	0.33373	0.33496	1.59874	1.57671	1.5844	0.490738	0.49943	0.51061	1.29575	1.26944	1.25417
8.63333	0.324509	0.32347	0.32393	1.53902	1.52894	1.53227	0.478404	0.48473	0.49342	1.23425	1.21799	1.20814
8.65	0.314808	0.31339	0.3133	1.47602	1.48045	1.47897	0.468883	0.47349	0.47977	1.16586	1.16268	1.15917
8.66667	0.304588	0.30325	0.30283	1.41414	1.43245	1.42626	0.46132	0.46466	0.46878	1.09643	1.10585	1.10878
8.68333	0.293867	0.29291	0.29237	1.35759	1.38615	1.37586	0.455037	0.45735	0.45975	1.03147	1.04992	1.05865
8.7	0.282773	0.28232	0.28182	1.30888	1.3429	1.32936	0.449524	0.45092	0.45206	0.974395	0.99723	1.01066
8.71667	0.271482	0.27149	0.27116	1.26839	1.30419	1.28819	0.444403	0.44491	0.44521	0.926261	0.94982	0.96683
8.73333	0.260162	0.26051	0.26043	1.23526	1.27153	1.25356	0.439368	0.43903	0.43877	0.886763	0.90941	0.92911
8.75	0.248939	0.24949	0.24969	1.20869	1.24621	1.22647	0.434157	0.43307	0.4324	0.855461	0.87732	0.89913
8.76667	0.237902	0.23857	0.23904	1.18876	1.22921	1.20776	0.428542	0.42686	0.42582	0.832426	0.85448	0.87802
8.78333	0.227113	0.22785	0.22855	1.17642	1.22112	1.19808	0.42233	0.42023	0.41882	0.818217	0.84154	0.86644
8.8	0.216624	0.21744	0.2183	1.17297	1.22226	1.19794	0.415372	0.41302	0.41122	0.813602	0.8389	0.86473
8.81667	0.206478	0.20739	0.20835	1.17969	1.23283	1.20775	0.407552	0.40505	0.4029	0.819338	0.8468	0.8731
8.83333	0.196713	0.19775	0.19876	1.19756	1.25299	1.22773	0.398773	0.39618	0.39377	0.836061	0.86534	0.89172
8.85	0.187364	0.18852	0.18955	1.22716	1.28279	1.25796	0.38895	0.38629	0.38376	0.86423	0.89458	0.92075
8.86667	0.178463	0.17972	0.18076	1.26858	1.3221	1.2983	0.378024	0.37536	0.37288	0.904076	0.93446	0.96017
8.88333	0.170034	0.17134	0.1724	1.3214	1.37053	1.34837	0.365983	0.36342	0.36115	0.955558	0.98485	1.00984
8.9	0.162092	0.1634	0.16448	1.38468	1.42738	1.40753	0.352882	0.35056	0.34865	1.01832	1.04548	1.06937
8.91667	0.154642	0.15591	0.15702	1.45698	1.49171	1.47485	0.338852	0.33694	0.33549	1.09169	1.1159	1.1382
8.93333	0.147678	0.14888	0.15	1.53651	1.56241	1.54915	0.324087	0.32274	0.3218	1.17469	1.19548	1.21556
8.95	0.141186	0.14232	0.14342	1.62122	1.63823	1.629	0.30883	0.30816	0.30772	1.2661	1.28334	1.30051
8.96667	0.135146	0.13622	0.13727	1.70908	1.7178	1.7128	0.293347	0.29341	0.29345	1.36453	1.37834	1.39197
8.98333	0.129537	0.13055	0.13153	1.79827	1.79958	1.79879	0.277906	0.27867	0.27914	1.46849	1.47908	1.48864
9	0.124334	0.12528	0.12616	1.88734	1.88192	1.88517	0.262759	0.26413	0.26498	1.57645	1.58389	1.58899
9.01667	0.119506	0.12038	0.12114	1.97527	1.96306	1.97014	0.248124	0.24994	0.25112	1.687	1.69088	1.69124
9.03333	0.115015	0.11579	0.11644	2.06119	2.04135	2.05202	0.234163	0.23624	0.23769	1.79875	1.79799	1.79342
9.05	0.110812	0.11147	0.11202	2.14381	2.11539	2.1293	0.22098	0.22315	0.22481	1.91011	1.90307	1.89352
9.06667	0.106848	0.10738	0.10784	2.22106	2.18412	2.20073	0.208623	0.21076	0.21256	2.01891	2.00405	1.98969
9.08333	0.103073	0.10348	0.10389	2.29037	2.24687	2.26533	0.197095	0.19913	0.20099	2.12216	2.09898	2.08036
9.1	0.0994487	0.09976	0.10012	2.34953	2.30321	2.32251	0.18637	0.18827	0.19013	2.21643	2.18625	2.16431
9.11667	0.0959446	0.09619	0.09651	2.39769	2.35293	2.37198	0.17641	0.17819	0.17997	2.29866	2.26462	2.24066
9.13333	0.0925422	0.09276	0.09304	2.43562	2.39594	2.41382	0.167166	0.16884	0.17051	2.36724	2.33334	2.30879
9.15	0.0892314	0.08944	0.08969	2.46518	2.43228	2.44838	0.158591	0.16018	0.16171	2.42239	2.39215	2.36836
9.16667	0.0860072	0.08623	0.08645	2.48845	2.46218	2.47628	0.150639	0.15214	0.15353	2.46585	2.44127	2.41926
9.18333	0.0828682	0.08311	0.08331	2.5071	2.48609	2.49827	0.143262	0.14467	0.14593	2.49993	2.48131	2.46172
9.2	0.0798146	0.08007	0.08026	2.52219	2.50464	2.51517	0.136415	0.13771	0.13887	2.52683	2.5132	2.4963
9.21667	0.0768475	0.07712	0.07731	2.53429	2.51849	2.52779	0.130055	0.13123	0.13231	2.54822	2.53806	2.52382
9.23333	0.0739699	0.07425	0.07446	2.54358	2.52818	2.53676	0.12414	0.1252	0.12621	2.56529	2.55705	2.54526
9.25	0.0711871	0.07148	0.07172	2.55001	2.53398	2.54249	0.118633	0.11958	0.12053	2.57883	2.5713	2.56156
9.26667	0.0685072	0.06881	0.06909	2.55339	2.5358	2.54505	0.113502	0.11436	0.11525	2.58927	2.58174	2.57346
9.28333	0.0659416	0.06626	0.06658	2.55352	2.53322	2.5441	0.108716	0.1095	0.11032	2.59679	2.58902	2.58141
9.3	0.0635039	0.06385	0.06421	2.55002	2.52549	2.5389	0.104248	0.10498	0.10572	2.60141	2.59346	2.58554
9.31667	0.0612079	0.06159	0.06198	2.54223	2.51163	2.52828	0.100073	0.10077	0.10142	2.6031	2.59491	2.58569
9.33333	0.0590663	0.05949	0.05991	2.52896	2.49051	2.51081	0.0961671	0.09682	0.09739	2.60168	2.59283	2.58137
9.35	0.0570912	0.05757	0.05801	2.50852	2.46109	2.48492	0.0925063	0.09311	0.09361	2.59672	2.58623	2.57184
9.36667	0.0552955	0.05583	0.05629	2.47873	2.42256	2.44914	0.0890647	0.0896	0.09006	2.58735	2.57382	2.55612
9.38333	0.0536954	0.0543	0.05478	2.43718	2.37451	2.40236	0.085817	0.08629	0.08671	2.57232	2.55413	2.53321
9.4	0.0523128	0.05297	0.05346	2.38175	2.317	2.34411	0.0827406	0.08315	0.08357	2.54985	2.52571	2.50216
9.41667	0.0511717	0.05185	0.05232	2.31131	2.2506	2.27469	0.0798196	0.0802	0.08061	2.5178	2.48741	2.4623
9.43333	0.0502889	0.05093	0.05136	2.22641	2.17636	2.19532	0.0770472	0.07742	0.07782	2.47392	2.43856	2.41336
9.45	0.0496597	0.05019	0.05054	2.12958	2.09585	2.10812	0.0744242	0.07481	0.07521	2.41642	2.37921	2.35558
9.46667	0.0492459	0.04959	0.04984	2.02495	2.01111	2.0159	0.0719565	0.07236	0.07275	2.34472	2.31014	2.2898
9.48333	0.0489743	0.0491	0.04923	1.91741	1.92458	1.92186	0.0696508	0.07008	0.07044	2.25986	2.23295	2.21745
9.5	0.04875	0.04866	0.04868	1.81178	1.83883	1.82926	0.06751	0.06795	0.06829	2.16466	2.1498	2.14037
9.51667	0.0484817	0.04825	0.04817	1.71235	1.75612	1.74097	0.0655311	0.06596	0.06627	2.06334	2.06325	2.06053
9.53333	0.0481057	0.04781	0.04767	1.62289	1.67796	1.65914	0.0637057	0.0641	0.0644	1.96116	1.97588	1.97965
9.55	0.047599	0.04733	0.04717	1.54658	1.60498	1.585	0.0620209	0.06238	0.06267	1.8638	1.89001	1.89901
9.56667	0.0469766	0.04678	0.04663	1.48538	1.53713	1.51874	0.0604638	0.06078	0.06106	1.7764	1.80743	1.81948
9.58333	0.0462764	0.04618	0.04606	1.43853	1.47405	1.45961	0.0590229	0.0593	0.05957	1.70195	1.72924	1.74179
9.6	0.0455405	0.04553	0.04545	1.40145	1.41536	1.4062	0.0576894	0.05794	0.05819	1.63956	1.65581	1.66673
9.61667	0.0448022	0.04485	0.0448	1.36664	1.36075	1.35674	0.056456	0.05669	0.05692	1.58429	1.5869	1.59509
9.63333	0.0440798	0.04415	0.04412	1.32684	1.30976	1.30947	0.0553162	0.05554	0.05574	1.52936	1.52185	1.52744
9.65	0.0433775	0.04344	0.04342	1.27859	1.26164	1.26296	0.0542632	0.05448	0.05465	1.46989	1.45986	1.46388
9.66667	0.0426907	0.04273	0.04271	1.22346	1.21537	1.21628	0.0532888	0.05349	0.05363	1.40533	1.40015	1.40395
9.68333	0.0420097	0.04202	0.04199	1.16626	1.16991	1.16916	0.0523836	0.05257	0.05267	1.339	1.34222	1.34682
9.7	0.0413238	0.0413	0.04126	1.11166	1.12455	1.12184	0.0515371	0.05169	0.05176	1.27528	1.28591	1.29165
9.71667	0.0406236	0.04058	0.04053	1.06199	1.07927	1.07497	0.0507366	0.05085	0.0509	1.21699	1.23136	1.23798
9.73333	0.0399014	0.03985	0.03978	1.01726	1.03467	1.02938	0.0499692	0.05003	0.05007	1.16462	1.17893	1.18595
9.75	0.0391527	0.03909	0.03902	0.97641	0.99166	0.98585	0.0492213	0.04924	0.04927	1.11721	1.12908	1.13613
9.76667	0.0383747	0.03831	0.03824	0.938391	0.95103	0.94495	0.0484811	0.04847	0.04848	1.07352	1.0822	1.08913
9.78333	0.037567	0.0375	0.03743	0.902546	0.91311	0.90696	0.0477373	0.04771	0.04769	1.03262	1.03848	1.04526
9.8	0.0367305	0.03667	0.03661	0.86854	0.87781	0.87184	0.0469816	0.04694	0.04691	0.993922	0.9979	1.00444
9.81667	0.0358678	0.03582	0.03577	0.836221	0.84482	0.83934	0.0462072	0.04616	0.04611	0.957068	0.96025	0.96632
9.83333	0.0349834	0.03496	0.03492	0.805542	0.81385	0.80906	0.0454099	0.04537	0.04531	0.921889	0.92513	0.93052
9.85	0.0340833	0.03408	0.03406	0.776503	0.78467	0.78062	0.0445889	0.04456	0.0445	0.888335	0.89213	0.89674
9.86667	0.0331755	0.03319	0.03319	0.749109	0.75714	0.75368	0.0437458	0.04373	0.04367	0.856428	0.86088	0.86478
9.88333	0.0322691	0.03232	0.03234	0.723347	0.73119	0.72807	0.0428852	0.04288	0.04284	0.826206	0.83109	0.83452
9.9	0.0313753	0.03145	0.0315	0.699184	0.70675	0.70372	0.0420139	0.04202	0.04201	0.797684	0.80264	0.80587
9.91667	0.0305059	0.03061	0.03069	0.676562	0.68375	0.68065	0.0411401	0.04117	0.04118	0.770847	0.77551	0.77876
9.93333	0.0296739	0.02981	0.02991	0.655407	0.66212	0.65891	0.0402741	0.04033	0.04036	0.745641	0.74975	0.75313
9.95	0.0288919	0.02906	0.02918	0.635627	0.64176	0.63855	0.0394271	0.03951	0.03956	0.721974	0.72543	0.72892
9.96667	0.0281724	0.02836	0.02848	0.6171	0.62262	0.61954	0.0386107	0.03872	0.03876	0.699721	0.70259	0.70607
9.98333	0.0275243	0.02772	0.02782	0.599678	0.60462	0.6018	0.0378339	0.03795	0.03797	0.678733	0.68121	0.68453
10	0.0269493	0.02712	0.02719	0.583204	0.58773	0.58521	0.037098	0.03719	0.03719	0.658854	0.6612	0.66427
10.0167	0.0264369	0.02655	0.02659	0.567545	0.5719	0.56965	0.0363925	0.03644	0.0364	0.639965	0.64245	0.64522
10.0333	0.0259638	0.026	0.026	0.552639	0.55709	0.55501	0.0356947	0.03567	0.03561	0.62203	0.62483	0.62736
10.05	0.025498	0.02546	0.02542	0.538538	0.54328	0.54124	0.034977	0.03489	0.0348	0.605108	0.60824	0.6106
10.0667	0.0250082	0.0249	0.02484	0.525382	0.5304	0.52833	0.0342156	0.03408	0.03398	0.589315	0.59262	0.5949
10.0833	0.024471	0.02433	0.02425	0.513319	0.5184	0.51628	0.033395	0.03323	0.03313	0.574743	0.57795	0.58018
10.1	0.0238735	0.02373	0.02364	0.502411	0.50721	0.50512	0.032509	0.03235	0.03227	0.561377	0.56421	0.56637
10.1167	0.0232148	0.02309	0.02302	0.492586	0.49677	0.49484	0.0315602	0.03144	0.03137	0.549091	0.55138	0.55341
10.1333	0.0225056	0.02244	0.02238	0.483664	0.48701	0.48537	0.0305629	0.03051	0.03047	0.537694	0.53941	0.54121
10.15	0.0217668	0.02176	0.02172	0.475423	0.47782	0.4766	0.0295419	0.02956	0.02954	0.52699	0.52821	0.52968
10.1667	0.0210227	0.02106	0.02104	0.467647	0.4691	0.46834	0.0285266	0.02861	0.02861	0.516805	0.51763	0.51871
10.1833	0.0202927	0.02036	0.02036	0.460143	0.46071	0.46042	0.0275405	0.02766	0.02769	0.506984	0.50751	0.50818
10.2	0.0195858	0.01967	0.01968	0.452727	0.45251	0.45262	0.0265951	0.02673	0.02677	0.497377	0.49766	0.49796
10.2167	0.0189031	0.01898	0.019	0.445224	0.44437	0.44479	0.0256919	0.02582	0.02588	0.487846	0.48794	0.48794
10.2333	0.0182415	0.01831	0.01834	0.437492	0.43619	0.4368	0.0248276	0.02494	0.02501	0.478287	0.47823	0.47805
10.25	0.0175989	0.01766	0.0177	0.429434	0.42789	0.42858	0.023999	0.02409	0.02417	0.468633	0.46846	0.46821
10.2667	0.0169743	0.01702	0.01707	0.421008	0.41941	0.4201	0.0232037	0.02329	0.02337	0.458857	0.45861	0.45837
10.2833	0.0163675	0.01642	0.01647	0.412215	0.41073	0.41135	0.0224403	0.02252	0.0226	0.448957	0.44868	0.44852
10.3	0.0157795	0.01583	0.01589	0.403093	0.40184	0.40237	0.0217078	0.02179	0.02187	0.43895	0.4387	0.43865
10.3167	0.0152124	0.01528	0.01533	0.393701	0.39278	0.39317	0.0210073	0.0211	0.02118	0.428864	0.4287	0.42879
10.3333	0.0146683	0.01474	0.01479	0.38411	0.38359	0.38382	0.0203403	0.02045	0.02052	0.418739	0.41873	0.41899
10.35	0.0141493	0.01423	0.01428	0.374398	0.37435	0.37437	0.0197092	0.01983	0.0199	0.408626	0.40886	0.40935
10.3667	0.013657	0.01375	0.0138	0.364648	0.36519	0.36492	0.0191161	0.01924	0.01932	0.398603	0.3992	0.4
10.3833	0.0131934	0.01329	0.01334	0.354964	0.35622	0.3556	0.0185641	0.0187	0.01878	0.388786	0.38987	0.39107
10.4	0.0127604	0.01286	0.01292	0.345483	0.34759	0.34657	0.0180569	0.0182	0.01828	0.379349	0.38107	0.38272
10.4167	0.0123602	0.01246	0.01252	0.336384	0.33941	0.33799	0.0175982	0.01773	0.01782	0.370534	0.37299	0.37509
10.4333	0.0119935	0.01208	0.01214	0.327884	0.33179	0.33003	0.0171901	0.01731	0.01739	0.362634	0.36582	0.36828
10.45	0.0116598	0.01174	0.01179	0.320215	0.32479	0.32283	0.0168295	0.01692	0.01699	0.355955	0.3597	0.36235
10.4667	0.0113552	0.01141	0.01146	0.313576	0.31846	0.31647	0.0165073	0.01657	0.01661	0.350741	0.35471	0.35729
10.4833	0.0110735	0.01111	0.01114	0.308083	0.31275	0.31094	0.0162088	0.01623	0.01625	0.347098	0.35079	0.35303
10.5	0.0108056	0.01083	0.01084	0.303715	0.30762	0.30616	0.0159161	0.01591	0.01589	0.344918	0.34779	0.34945
10.5167	0.0105423	0.01055	0.01056	0.30029	0.30299	0.30199	0.0156125	0.01558	0.01555	0.343863	0.34546	0.34639
10.5333	0.0102763	0.01028	0.01028	0.297492	0.29877	0.29823	0.015286	0.01524	0.01522	0.343406	0.34351	0.34371
10.55	0.0100049	0.01001	0.01003	0.294925	0.29488	0.29469	0.0149333	0.0149	0.0149	0.342938	0.34164	0.34127
10.5667	0.00973041	0.00975	0.0098	0.292211	0.29127	0.29124	0.0145605	0.01456	0.01461	0.341902	0.33961	0.33896
10.5833	0.00946188	0.00952	0.00961	0.289085	0.28793	0.28779	0.0141839	0.01424	0.01436	0.339933	0.33731	0.33677
10.6	0.009214	0.00932	0.00947	0.285457	0.28492	0.28441	0.0138293	0.01397	0.01419	0.336939	0.3348	0.33475
10.6167	0.00900805	0.00918	0.0094	0.281454	0.28236	0.28124	0.0135328	0.01379	0.01411	0.333142	0.33228	0.33306
10.6333	0.00887265	0.00914	0.00943	0.277413	0.28042	0.27855	0.0133403	0.01375	0.01416	0.32905	0.3301	0.3319
10.65	0.00884299	0.00922	0.00957	0.273842	0.27932	0.27666	0.0133071	0.01388	0.01438	0.325392	0.32869	0.33154
10.6667	0.00896025	0.00945	0.00984	0.271361	0.27924	0.27591	0.0134945	0.01423	0.01478	0.323011	0.32849	0.33223
10.6833	0.0092659	0.00985	0.01025	0.270608	0.28032	0.27656	0.0139614	0.01481	0.01537	0.322728	0.32988	0.33415
10.7	0.00979404	0.01042	0.0108	0.27212	0.28261	0.27881	0.0147512	0.01563	0.01615	0.325184	0.33306	0.33736
10.7167	0.0105611	0.01115	0.01148	0.276193	0.28604	0.28264	0.0158772	0.01667	0.0171	0.33067	0.33803	0.3418
10.7333	0.0115548	0.01202	0.01225	0.282756	0.29041	0.28788	0.0173093	0.01789	0.01816	0.339006	0.34457	0.34723
10.75	0.0127282	0.01298	0.01308	0.291313	0.29544	0.29417	0.0189674	0.01922	0.0193	0.3495	0.35222	0.35331
10.7667	0.014	0.01398	0.01392	0.300985	0.30074	0.30099	0.0207257	0.02059	0.02043	0.361037	0.36034	0.35961
10.7833	0.0152644	0.01496	0.01474	0.310651	0.3059	0.30774	0.0224289	0.02189	0.02151	0.372275	0.3682	0.3656
10.8	0.0164082	0.01585	0.01548	0.319158	0.31048	0.31376	0.0239174	0.02303	0.02246	0.381892	0.37503	0.37077
10.8167	0.0173305	0.01659	0.01611	0.325531	0.31407	0.31848	0.0250559	0.02395	0.02323	0.38881	0.38015	0.37462
10.8333	0.0179599	0.01714	0.01659	0.32913	0.31631	0.32142	0.0257563	0.02458	0.02378	0.392343	0.38302	0.37675
10.85	0.0182654	0.01747	0.0169	0.329705	0.31693	0.32227	0.0259903	0.02488	0.02407	0.392243	0.38333	0.37687
10.8667	0.0182564	0.01757	0.01702	0.327371	0.3158	0.32093	0.0257863	0.02485	0.0241	0.38866	0.38097	0.37484
10.8833	0.0179749	0.01744	0.01696	0.322508	0.31291	0.31746	0.0252146	0.02452	0.02387	0.382049	0.37606	0.37068
10.9	0.0174815	0.01711	0.01671	0.315648	0.30836	0.31211	0.0243674	0.02391	0.02339	0.373058	0.36893	0.36458
10.9167	0.0168406	0.01662	0.01632	0.307364	0.30237	0.3052	0.0233376	0.02309	0.02271	0.362402	0.36001	0.35681
10.9333	0.0161099	0.01601	0.0158	0.298192	0.29521	0.29714	0.0222052	0.02211	0.02187	0.35076	0.34978	0.34772
10.95	0.0153345	0.01531	0.01519	0.288569	0.28719	0.2883	0.0210306	0.02104	0.02092	0.338695	0.33872	0.33767
10.9667	0.0145457	0.01457	0.01452	0.278815	0.27858	0.27905	0.0198544	0.01993	0.01989	0.326618	0.32727	0.32701
10.9833	0.0137633	0.01381	0.01381	0.269137	0.26964	0.26964	0.0187015	0.01881	0.01884	0.314786	0.31576	0.31607
11	0.0129986	0.01306	0.01309	0.259645	0.26058	0.26028	0.0175857	0.0177	0.01778	0.303329	0.30443	0.30509
11.0167	0.0122575	0.01233	0.01238	0.250393	0.25156	0.25108	0.0165142	0.01664	0.01674	0.292295	0.29341	0.29426
11.0333	0.0115432	0.01162	0.01169	0.241396	0.24268	0.24211	0.015491	0.01563	0.01574	0.281684	0.28278	0.28371
11.05	0.0108577	0.01094	0.01102	0.232659	0.23403	0.2334	0.0145189	0.01466	0.01479	0.271483	0.27256	0.27352
11.0667	0.0102036	0.0103	0.01038	0.224191	0.22563	0.22497	0.013601	0.01376	0.01388	0.26168	0.26276	0.26372
11.0833	0.00958397	0.00969	0.00977	0.216006	0.21753	0.21683	0.0127401	0.0129	0.01304	0.252275	0.25337	0.25434
11.1	0.00900261	0.00911	0.00921	0.208122	0.20975	0.20899	0.0119393	0.0121	0.01224	0.243276	0.24439	0.24538
11.1167	0.00846293	0.00858	0.00868	0.200563	0.20228	0.20147	0.0112006	0.01137	0.01151	0.234699	0.23583	0.23684
11.1333	0.00796795	0.00809	0.00819	0.193353	0.19514	0.1943	0.0105252	0.01069	0.01083	0.226556	0.2277	0.22873
11.15	0.0075196	0.00764	0.00775	0.18651	0.18834	0.18749	0.00991223	0.01007	0.01021	0.218857	0.22	0.22102
11.1667	0.00711801	0.00724	0.00734	0.180045	0.18189	0.18104	0.00935919	0.00951	0.00964	0.211602	0.21273	0.21373
11.1833	0.00676243	0.00688	0.00698	0.173962	0.17577	0.17496	0.00886281	0.00901	0.00912	0.204786	0.20589	0.20683
11.2	0.00645084	0.00656	0.00665	0.168252	0.16999	0.16922	0.00841913	0.00855	0.00866	0.19839	0.19945	0.20032
11.2167	0.00618024	0.00628	0.00636	0.1629	0.16454	0.16381	0.00802412	0.00814	0.00824	0.192392	0.19338	0.19417
11.2333	0.00594661	0.00603	0.0061	0.157884	0.15939	0.15872	0.00767307	0.00778	0.00786	0.186756	0.18764	0.18836
11.25	0.00574496	0.00582	0.00588	0.153174	0.15452	0.15391	0.00736024	0.00745	0.00752	0.181445	0.18222	0.18286
11.2667	0.00556979	0.00563	0.00568	0.148737	0.14992	0.14937	0.00707984	0.00715	0.00722	0.176415	0.17706	0.17763
11.2833	0.00541601	0.00546	0.00551	0.144537	0.14556	0.14506	0.00682626	0.00688	0.00694	0.171627	0.17216	0.17267
11.3	0.00527945	0.00532	0.00535	0.140536	0.14141	0.14098	0.00659432	0.00664	0.00669	0.167039	0.16747	0.16792
11.3167	0.0051568	0.00519	0.00522	0.136704	0.13746	0.13708	0.00637951	0.00642	0.00645	0.162619	0.16298	0.16337
11.3333	0.0050456	0.00507	0.0051	0.133013	0.13367	0.13335	0.00617848	0.00621	0.00624	0.158338	0.15866	0.159
11.35	0.00494397	0.00497	0.00499	0.129443	0.13003	0.12976	0.00598798	0.00602	0.00604	0.154178	0.15449	0.15478
11.3667	0.00485027	0.00487	0.00489	0.125983	0.12654	0.1263	0.0058059	0.00583	0.00585	0.150128	0.15045	0.1507
11.3833	0.00476353	0.00478	0.00479	0.122626	0.12317	0.12294	0.00563126	0.00566	0.00567	0.146184	0.14652	0.14676
11.4	0.00468264	0.0047	0.00471	0.119374	0.11993	0.1197	0.00546372	0.00549	0.0055	0.142351	0.1427	0.14295
11.4167	0.00460691	0.00462	0.00463	0.116229	0.1168	0.11656	0.00530388	0.00533	0.00534	0.138633	0.139	0.13926
11.4333	0.00453582	0.00455	0.00455	0.113198	0.11378	0.11353	0.00515211	0.00517	0.00519	0.135042	0.13541	0.13569
11.45	0.00446882	0.00448	0.00448	0.110285	0.11087	0.11062	0.00500872	0.00503	0.00504	0.131583	0.13195	0.13224
11.4667	0.00440507	0.00441	0.00441	0.107494	0.10807	0.10782	0.00487287	0.00489	0.0049	0.128264	0.12863	0.12892
11.4833	0.00434351	0.00435	0.00435	0.104827	0.10537	0.10514	0.0047436	0.00476	0.00477	0.125082	0.12543	0.12571
11.5	0.00428274	0.00428	0.00428	0.102277	0.10276	0.10256	0.0046195	0.00464	0.00464	0.122032	0.12237	0.12262
11.5167	0.00422132	0.00422	0.00421	0.0998279	0.10025	0.10008	0.00449924	0.00451	0.00451	0.119106	0.11942	0.11964
11.5333	0.00415814	0.00416	0.00415	0.097461	0.09782	0.09768	0.0043819	0.00439	0.00439	0.116288	0.11657	0.11675
11.55	0.00409255	0.00409	0.00408	0.0951601	0.09546	0.09535	0.00426669	0.00428	0.00427	0.113565	0.11381	0.11396
11.5667	0.00402415	0.00402	0.00401	0.0929149	0.09317	0.09308	0.00415273	0.00416	0.00415	0.110919	0.11113	0.11125
11.5833	0.00395276	0.00395	0.00394	0.0907202	0.09093	0.09085	0.00403883	0.00404	0.00404	0.108336	0.1085	0.10861
11.6	0.00387838	0.00387	0.00386	0.0885687	0.08875	0.08867	0.00392375	0.00392	0.00392	0.105803	0.10593	0.10603
11.6167	0.0038007	0.00379	0.00379	0.086451	0.0866	0.08653	0.00380666	0.0038	0.0038	0.10331	0.10341	0.1035
11.6333	0.00372007	0.00371	0.00371	0.0843586	0.08449	0.08443	0.00368748	0.00368	0.00368	0.100851	0.10094	0.10102
11.65	0.00363662	0.00363	0.00363	0.0822888	0.08242	0.08237	0.00356658	0.00357	0.00356	0.0984227	0.09851	0.09859
11.6667	0.00355115	0.00355	0.00355	0.0802428	0.08038	0.08034	0.00344462	0.00345	0.00344	0.0960257	0.09613	0.0962
11.6833	0.00346448	0.00347	0.00346	0.0782228	0.07837	0.07833	0.0033221	0.00333	0.00332	0.0936615	0.09379	0.09385
11.7	0.00337782	0.00338	0.00338	0.076232	0.07639	0.07635	0.0031996	0.00321	0.0032	0.0913339	0.09148	0.09153
11.7167	0.00329196	0.0033	0.0033	0.0742732	0.07445	0.07441	0.00307827	0.00309	0.00309	0.0890468	0.0892	0.08926
11.7333	0.0032079	0.00322	0.00322	0.0723498	0.07254	0.07248	0.00295894	0.00297	0.00297	0.0868036	0.08697	0.08703
11.75	0.00312607	0.00313	0.00314	0.0704649	0.07066	0.0706	0.00284216	0.00285	0.00285	0.0846071	0.08477	0.08484
11.7667	0.00304677	0.00305	0.00306	0.068621	0.06883	0.06875	0.00272806	0.00274	0.00274	0.0824591	0.08261	0.0827
11.7833	0.00297041	0.00298	0.00299	0.0668196	0.06703	0.06694	0.0026166	0.00262	0.00263	0.0803606	0.0805	0.0806
11.8	0.0028971	0.0029	0.00291	0.0650611	0.06527	0.06518	0.00250788	0.00252	0.00252	0.0783117	0.07845	0.07855
11.8167	0.00282712	0.00283	0.00284	0.0633451	0.06355	0.06347	0.00240226	0.00241	0.00242	0.076312	0.07645	0.07655
11.8333	0.00276029	0.00277	0.00277	0.0616712	0.06188	0.0618	0.00229967	0.00231	0.00231	0.0743599	0.0745	0.07459
11.85	0.00269668	0.0027	0.00271	0.0600385	0.06024	0.06017	0.00220005	0.00221	0.00221	0.0724539	0.0726	0.07267
11.8667	0.00263555	0.00264	0.00264	0.0584459	0.05864	0.05858	0.00210347	0.00212	0.00212	0.070592	0.07074	0.0708
11.8833	0.00257635	0.00258	0.00258	0.0568917	0.05708	0.05702	0.00200992	0.00202	0.00202	0.0687724	0.06891	0.06897
11.9	0.00251815	0.00252	0.00252	0.0553745	0.05555	0.0555	0.00191925	0.00193	0.00193	0.0669928	0.06713	0.06718
11.9167	0.0024606	0.00246	0.00247	0.0538922	0.05406	0.054	0.00183117	0.00184	0.00184	0.0652507	0.06537	0.06543
11.9333	0.00240378	0.0024	0.00241	0.0524436	0.05261	0.05254	0.00174573	0.00175	0.00176	0.063544	0.06365	0.06372
11.95	0.00234778	0.00235	0.00235	0.0510276	0.05119	0.05112	0.0016628	0.00167	0.00168	0.0618708	0.06197	0.06204
11.9667	0.00229299	0.00229	0.0023	0.0496438	0.0498	0.04973	0.00158267	0.00159	0.0016	0.0602302	0.06032	0.06039
11.9833	0.00223901	0.00224	0.00224	0.0482917	0.04845	0.04839	0.00150588	0.00151	0.00152	0.0586214	0.05871	0.05878
12	0.00218575	0.00219	0.00219	0.0469712	0.04713	0.04707	0.00143218	0.00144	0.00145	0.0570447	0.05714	0.05721
12.0167	0.0021332	0.00214	0.00214	0.0456819	0.04584	0.04579	0.00136163	0.00137	0.00138	0.0555005	0.05561	0.05567
12.0333	0.00208185	0.00209	0.00209	0.0444241	0.04459	0.04454	0.00129407	0.0013	0.00131	0.0539895	0.05411	0.05416
12.05	0.0020323	0.00204	0.00204	0.0431987	0.04336	0.04332	0.00122926	0.00124	0.00124	0.0525127	0.05264	0.05269
12.0667	0.0019845	0.00199	0.00199	0.0420068	0.04217	0.04212	0.00116692	0.00117	0.00118	0.0510713	0.0512	0.05125
12.0833	0.00193865	0.00194	0.00195	0.0408494	0.04102	0.04096	0.00110669	0.00111	0.00112	0.0496662	0.04979	0.04985
12.1	0.00189471	0.0019	0.0019	0.0397266	0.03989	0.03983	0.00104857	0.00105	0.00106	0.0482982	0.04841	0.04848
12.1167	0.00185273	0.00185	0.00186	0.0386374	0.0388	0.03873	0.000992799	0.000996655	0.00101	0.0469675	0.04707	0.04715
12.1333	0.00181265	0.00181	0.00182	0.037581	0.03774	0.03767	0.000939798	0.000944243	0.000952222	0.0456742	0.04578	0.04586
12.15	0.00177441	0.00178	0.00178	0.036556	0.03671	0.03665	0.00088954	0.000894824	0.000901417	0.0444178	0.04452	0.04459
12.1667	0.00173762	0.00174	0.00175	0.0355617	0.03571	0.03565	0.000841856	0.000847845	0.000852847	0.043197	0.0433	0.04337
12.1833	0.00170245	0.00171	0.00171	0.0345973	0.03474	0.03469	0.000796247	0.000802694	0.000806503	0.0420103	0.04212	0.04218
12.2	0.00166891	0.00167	0.00168	0.0336615	0.0338	0.03376	0.000752378	0.000758901	0.000762354	0.0408567	0.04097	0.04102
12.2167	0.00163705	0.00164	0.00164	0.0327522	0.03288	0.03284	0.000710392	0.000716276	0.000720273	0.0397348	0.03984	0.03989
12.2333	0.00160651	0.00161	0.00161	0.0318681	0.03199	0.03195	0.000670409	0.00067494	0.000680059	0.0386434	0.03875	0.03879
12.25	0.00157707	0.00158	0.00158	0.0310076	0.03112	0.03108	0.000632644	0.000635219	0.000641485	0.0375823	0.03768	0.03772
12.2667	0.00154839	0.00155	0.00155	0.0301697	0.03028	0.03023	0.000596905	0.000597472	0.000604372	0.0365502	0.03663	0.03668
12.2833	0.00152049	0.00152	0.00152	0.0293533	0.02946	0.02941	0.00056293	0.000561895	0.000568615	0.0355456	0.03561	0.03567
12.3	0.00149343	0.00149	0.0015	0.0285572	0.02865	0.02861	0.000529909	0.000528394	0.000534149	0.0345645	0.03462	0.03467
12.3167	0.00146732	0.00147	0.00147	0.0277804	0.02787	0.02784	0.000497437	0.000496576	0.000500913	0.0336034	0.03366	0.03371
12.3333	0.00144212	0.00144	0.00145	0.0270218	0.02711	0.02708	0.000465226	0.000465853	0.000468807	0.0326606	0.03272	0.03277
12.35	0.0014178	0.00142	0.00142	0.0262808	0.02637	0.02634	0.000433612	0.000435629	0.000437698	0.0317377	0.03181	0.03185
12.3667	0.00139446	0.00139	0.0014	0.0255571	0.02564	0.02562	0.000402927	0.000405488	0.000407462	0.0308374	0.03092	0.03095
12.3833	0.00137193	0.00137	0.00137	0.0248498	0.02493	0.02491	0.000373244	0.000375329	0.000378	0.0299609	0.03005	0.03007
12.4	0.00134988	0.00135	0.00135	0.0241591	0.02424	0.02422	0.000344801	0.000345367	0.000349275	0.0291079	0.02919	0.02922
12.4167	0.00132816	0.00133	0.00133	0.0234849	0.02357	0.02354	0.00031724	0.00031604	0.000321258	0.0282766	0.02835	0.02839
12.4333	0.00130672	0.0013	0.00131	0.0228276	0.02291	0.02288	0.000290442	0.000287811	0.000293925	0.0274668	0.02753	0.02758
12.45	0.00128558	0.00128	0.00129	0.0221874	0.02227	0.02223	0.000264311	0.000260987	0.00026725	0.0266782	0.02674	0.02679
12.4667	0.00126493	0.00126	0.00127	0.0215644	0.02165	0.02161	0.000238848	0.000235581	0.0002412	0.0259112	0.02597	0.02602
12.4833	0.00124454	0.00124	0.00125	0.0209588	0.02105	0.02101	0.000213933	0.000211305	0.000215765	0.0251665	0.02523	0.02528
12.5	0.00122433	0.00122	0.00123	0.0203709	0.02046	0.02043	0.000189257	0.000187661	0.000190913	0.0244443	0.02451	0.02456
12.5167	0.00120444	0.0012	0.00121	0.0198015	0.01989	0.01986	0.000164557	0.000164129	0.00016662	0.0237449	0.02382	0.02386
12.5333	0.00118484	0.00118	0.00119	0.0192505	0.01934	0.01931	0.00014019	0.00014035	0.000142826	0.023068	0.02314	0.02318
12.55	0.00116556	0.00116	0.00117	0.0187178	0.01881	0.01878	0.000116372	0.000116256	0.000119485	0.0224135	0.02249	0.02252
12.5667	0.00114665	0.00114	0.00115	0.0182028	0.01829	0.01826	9.34601e-05	9.20901e-05	9.65748e-05	0.0217815	0.02186	0.02189
12.5833	0.00112822	0.00112	0.00113	0.0177048	0.01779	0.01776	7.14302e-05	6.83071e-05	7.41331e-05	0.0211714	0.02124	0.02128
12.6	0.00111048	0.00111	0.00111	0.0172239	0.01731	0.01727	5.00202e-05	4.54037e-05	5.22115e-05	0.0205829	0.02064	0.02069
12.6167	0.00109325	0.00109	0.00109	0.0167602	0.01685	0.0168	2.87056e-05	2.37357e-05	3.08904e-05	0.0200152	0.02007	0.02012
12.6333	0.00107627	0.00107	0.00108	0.0163139	0.0164	0.01636	7.55787e-06	3.39095e-06	1.02108e-05	0.0194681	0.01952	0.01957
12.65	0.00105908	0.00105	0.00106	0.0158851	0.01597	0.01593	-1.31607e-05	-1.58321e-05	-9.82719e-06	0.0189417	0.019	0.01904
12.6667	0.00104177	0.00104	0.00104	0.0154734	0.01556	0.01552	-3.29256e-05	-3.43332e-05	-2.92778e-05	0.0184361	0.01849	0.01854
12.6833	0.00102465	0.00102	0.00103	0.0150785	0.01516	0.01513	-5.18799e-05	-5.25474e-05	-4.81844e-05	0.0179511	0.01801	0.01805
12.7	0.00100822	0.00101	0.00101	0.0147003	0.01478	0.01476	-6.99759e-05	-7.07707e-05	-6.6521e-05	0.0174865	0.01755	0.01759
12.7167	0.000992513	0.000989746	0.00099522	0.0143389	0.01442	0.01439	-8.7285e-05	-8.90392e-05	-8.41877e-05	0.0170422	0.01711	0.01714
12.7333	0.000977397	0.000973963	0.000980061	0.0139941	0.01407	0.01404	-0.000104046	-0.000107112	-0.000101076	0.0166178	0.01668	0.01672
12.75	0.000962663	0.000958306	0.000965405	0.0136655	0.01374	0.01371	-0.000120497	-0.000124562	-0.000117139	0.0162136	0.01627	0.01631
12.7667	0.000948381	0.000943116	0.000951249	0.0133524	0.01343	0.01339	-0.000136542	-0.000140933	-0.000132442	0.0158292	0.01588	0.01592
12.7833	0.000934672	0.000928736	0.000937579	0.0130544	0.01313	0.01309	-0.000151682	-0.000155918	-0.000147072	0.0154644	0.01551	0.01556
12.8	0.000921798	0.000915382	0.000924345	0.0127713	0.01284	0.0128	-0.000165629	-0.000169473	-0.000161108	0.0151184	0.01516	0.0152
12.8167	0.000909519	0.000903059	0.000911548	0.0125025	0.01257	0.01253	-0.000178218	-0.000181837	-0.000174572	0.0147898	0.01483	0.01487
12.8333	0.000897861	0.000891555	0.000899198	0.0122469	0.01231	0.01228	-0.000189853	-0.000193449	-0.000187449	0.0144773	0.01452	0.01455
12.85	0.000886059	0.000880524	0.000887322	0.0120029	0.01206	0.01204	-0.000201249	-0.000204788	-0.000199691	0.0141796	0.01422	0.01425
12.8667	0.000874281	0.000869602	0.000875896	0.0117693	0.01182	0.0118	-0.000212812	-0.000216211	-0.0002113	0.0138954	0.01394	0.01396
12.8833	0.000862646	0.000858537	0.000864861	0.011545	0.01159	0.01157	-0.000224376	-0.000227832	-0.000222356	0.0136237	0.01367	0.01368
12.9	0.00085175	0.000847276	0.000854134	0.0113295	0.01137	0.01135	-0.000235391	-0.000239508	-0.000232978	0.0133634	0.0134	0.01342
12.9167	0.000841546	0.000835966	0.000843655	0.0111221	0.01116	0.01114	-0.00024569	-0.000250916	-0.000243291	0.0131138	0.01314	0.01316
12.9333	0.000832033	0.000824885	0.000833377	0.0109228	0.01096	0.01094	-0.000255156	-0.000261706	-0.000253374	0.0128736	0.0129	0.01292
12.95	0.000822687	0.000814325	0.000823333	0.0107307	0.01076	0.01074	-0.000264239	-0.000271663	-0.000263277	0.0126415	0.01266	0.01268
12.9667	0.000813293	0.000804464	0.000813534	0.0105456	0.01058	0.01055	-0.000273299	-0.000280812	-0.000273041	0.0124165	0.01243	0.01245
12.9833	0.000803804	0.000795287	0.000803967	0.0103666	0.01039	0.01038	-0.000282478	-0.000289437	-0.000282751	0.0121974	0.01221	0.01223
13	0.000794244	0.000786582	0.000794543	0.0101926	0.01022	0.0102	-0.000291658	-0.000298	-0.000292494	0.0119842	0.012	0.01201
13.0167	0.000784802	0.000778012	0.00078519	0.0100234	0.01005	0.01004	-0.000300765	-0.000306982	-0.000302328	0.0117771	0.01179	0.0118
13.0333	0.000775576	0.000769225	0.000775866	0.00985838	0.00988	0.00987	-0.000310183	-0.000316729	-0.000312272	0.0115758	0.0116	0.0116
13.05	0.000766492	0.00075999	0.000766581	0.00969769	0.00972	0.00971	-0.00032022	-0.00032734	-0.000322331	0.0113798	0.0114	0.0114
13.0667	0.000757408	0.000750264	0.00075736	0.00954114	0.00956	0.00955	-0.000331187	-0.000338645	-0.000332516	0.0111886	0.01121	0.01121
13.0833	0.000748086	0.000740206	0.000748188	0.00938796	0.0094	0.00939	-0.00034256	-0.000350285	-0.000342881	0.0110013	0.01101	0.01102
13.1	0.000738668	0.000730107	0.00073903	0.00923754	0.00925	0.00924	-0.000353861	-0.00036186	-0.00035349	0.0108177	0.01082	0.01084
13.1167	0.000729466	0.000720273	0.000729834	0.00908977	0.0091	0.00909	-0.000364542	-0.000373083	-0.000364412	0.0106373	0.01064	0.01066
13.1333	0.000720549	0.000710903	0.000720583	0.00894479	0.00896	0.00894	-0.000374889	-0.00038389	-0.00037565	0.0104605	0.01046	0.01048
13.15	0.00071187	0.000702014	0.000711298	0.00880269	0.00882	0.0088	-0.000385332	-0.000394461	-0.000387146	0.0102873	0.01029	0.01031
13.1667	0.000702906	0.000693428	0.000701995	0.00866359	0.00868	0.00867	-0.00039649	-0.000405138	-0.000398779	0.0101178	0.01012	0.01014
13.1833	0.000693512	0.000684841	0.000692704	0.00852753	0.00854	0.00853	-0.000408363	-0.000416289	-0.000410494	0.00995209	0.00996	0.00997
13.2	0.000683641	0.000675938	0.000683401	0.00839411	0.00841	0.0084	-0.000420904	-0.000428153	-0.000422228	0.00978978	0.0098	0.00981
13.2167	0.000673819	0.000666511	0.000674051	0.00826324	0.00828	0.00827	-0.000433803	-0.000440735	-0.000433993	0.00963082	0.00964	0.00965
13.2333	0.000664353	0.000656537	0.000664629	0.0081349	0.00815	0.00814	-0.000446677	-0.000453793	-0.000445797	0.00947528	0.00949	0.00949
13.25	0.000655079	0.000646193	0.00065514	0.00800885	0.00802	0.00801	-0.000459147	-0.000466917	-0.00045764	0.00932336	0.00933	0.00934
13.2667	0.000645876	0.000635787	0.000645633	0.00788528	0.0079	0.00788	-0.000471425	-0.000479674	-0.000469479	0.00917513	0.00918	0.00919
13.2833	0.000636339	0.000625649	0.000636179	0.0077643	0.00778	0.00776	-0.000482941	-0.00049176	-0.000481306	0.0090303	0.00903	0.00905
13.3	0.000626612	0.000616014	0.000626829	0.00764619	0.00766	0.00764	-0.000493956	-0.000503111	-0.000493104	0.00888863	0.00889	0.00891
13.3167	0.000616908	0.000606936	0.000617565	0.00753108	0.00755	0.00753	-0.000504732	-0.000513919	-0.000504858	0.00875051	0.00875	0.00877
13.3333	0.000607491	0.000598283	0.000608351	0.00741907	0.00743	0.00742	-0.000515604	-0.00052456	-0.000516536	0.00861597	0.00862	0.00863
13.35	0.000598335	0.000589793	0.000599172	0.00730978	0.00732	0.00731	-0.000526714	-0.000535448	-0.000528121	0.00848565	0.00849	0.0085
13.3667	0.000589514	0.000581178	0.000590054	0.00720307	0.00722	0.0072	-0.000538468	-0.000546877	-0.000539578	0.00835929	0.00837	0.00838
13.3833	0.000580788	0.00057224	0.000581072	0.00709876	0.00711	0.0071	-0.000550675	-0.000558915	-0.000550942	0.00823691	0.00825	0.00825
13.4	0.000571919	0.000562946	0.000572246	0.00699717	0.00701	0.007	-0.000563097	-0.000571375	-0.00056226	0.00811756	0.00812	0.00813
13.4167	0.000563002	0.000553439	0.000563576	0.0068987	0.00691	0.00689	-0.000575137	-0.000583889	-0.000573548	0.00800118	0.008	0.00802
13.4333	0.000554109	0.000543978	0.000555002	0.00680345	0.00682	0.0068	-0.000586581	-0.000596039	-0.000584804	0.00788813	0.00789	0.00791
13.45	0.000545573	0.000534838	0.000546462	0.00671128	0.00672	0.0067	-0.000597453	-0.000607518	-0.000596003	0.00777862	0.00777	0.0078
13.4667	0.000537539	0.000526195	0.000537914	0.00662187	0.00663	0.00661	-0.000607944	-0.000618237	-0.000607098	0.00767302	0.00767	0.00769
13.4833	0.000529528	0.000518054	0.000529354	0.00653495	0.00655	0.00652	-0.000618458	-0.000628353	-0.000618044	0.00757098	0.00757	0.00759
13.5	0.000521541	0.000510245	0.000520815	0.00644997	0.00646	0.00644	-0.000628901	-0.000638211	-0.000628823	0.00747209	0.00747	0.00749
13.5167	0.000513172	0.00050248	0.000512325	0.00636665	0.00638	0.00636	-0.000639415	-0.0006482	-0.000639445	0.00737586	0.00737	0.00739
13.5333	0.000504398	0.000494459	0.000503911	0.00628487	0.00629	0.00628	-0.000649905	-0.000658615	-0.000649942	0.00728235	0.00728	0.0073
13.55	0.000495482	0.000485986	0.000495534	0.00620507	0.00622	0.0062	-0.000660515	-0.000669534	-0.000660326	0.00719151	0.00719	0.0072
13.5667	0.000486636	0.000477036	0.000487154	0.00612775	0.00614	0.00612	-0.000671077	-0.000680795	-0.000670583	0.00710349	0.0071	0.00712
13.5833	0.000477982	0.000467775	0.000478762	0.00605305	0.00606	0.00604	-0.000681663	-0.000692051	-0.000680672	0.00701783	0.00701	0.00703
13.6	0.000469613	0.000458493	0.000470344	0.00598043	0.00599	0.00596	-0.000691986	-0.000702897	-0.000690584	0.00693445	0.00693	0.00694
13.6167	0.000461555	0.000449501	0.000461949	0.00590884	0.00591	0.00589	-0.000702047	-0.000713023	-0.000700331	0.00685275	0.00684	0.00686
13.6333	0.000453425	0.000441018	0.000453639	0.0058381	0.00584	0.00582	-0.00071168	-0.000722318	-0.00070992	0.00677302	0.00676	0.00678
13.65	0.000445366	0.000433097	0.000445455	0.00576805	0.00577	0.00575	-0.000720763	-0.000730916	-0.000719309	0.00669527	0.00668	0.0067
13.6667	0.000437212	0.000425607	0.000437403	0.00569888	0.0057	0.00568	-0.000729442	-0.000739135	-0.000728456	0.00661948	0.00661	0.00663
13.6833	0.000428939	0.000418289	0.000429474	0.00563048	0.00563	0.00562	-0.000737929	-0.000747359	-0.000737344	0.00654523	0.00654	0.00655
13.7	0.000420833	0.000410865	0.000421652	0.00556272	0.00557	0.00555	-0.000746632	-0.000755898	-0.000746027	0.00647163	0.00646	0.00648
13.7167	0.000412989	0.000403143	0.000413934	0.00549549	0.0055	0.00548	-0.000755382	-0.000764874	-0.000754591	0.00639842	0.00639	0.0064
13.7333	0.000405455	0.000395093	0.000406343	0.00542866	0.00543	0.00541	-0.000763798	-0.000774187	-0.0007631	0.00632586	0.00632	0.00633
13.75	0.000398064	0.000386864	0.000398885	0.00536245	0.00536	0.00534	-0.000771689	-0.00078356	-0.00077157	0.00625415	0.00624	0.00626
13.7667	0.000390768	0.000378724	0.000391564	0.00529679	0.0053	0.00528	-0.000779438	-0.000792652	-0.000779943	0.00618322	0.00617	0.00618
13.7833	0.000383568	0.000370962	0.000384389	0.00523158	0.00523	0.00521	-0.000787497	-0.000801192	-0.000788179	0.00611227	0.00609	0.00611
13.8	0.000376654	0.000363771	0.000377349	0.00516654	0.00517	0.00514	-0.000796247	-0.000809091	-0.00079624	0.00604083	0.00602	0.00604
13.8167	0.00036993	0.000357178	0.000370437	0.00510138	0.0051	0.00508	-0.000805283	-0.000816471	-0.000804164	0.00596888	0.00595	0.00597
13.8333	0.000363326	0.00035102	0.000363616	0.00503637	0.00504	0.00502	-0.000813937	-0.000823623	-0.000812036	0.0058969	0.00588	0.0059
13.85	0.000356674	0.000345006	0.000356854	0.00497171	0.00497	0.00495	-0.000821543	-0.000830894	-0.000819939	0.00582535	0.00581	0.00583
13.8667	0.000350022	0.000338816	0.00035012	0.00490762	0.00491	0.00489	-0.000828528	-0.00083856	-0.000827887	0.00575419	0.00574	0.00575
13.8833	0.000343394	0.000332214	0.000343403	0.00484377	0.00484	0.00483	-0.0008353	-0.000846717	-0.00083582	0.00568297	0.00567	0.00568
13.9	0.000336957	0.000325132	0.000336695	0.00477964	0.00478	0.00476	-0.000842547	-0.000855253	-0.000843631	0.00561097	0.0056	0.00561
13.9167	0.000330424	0.000317685	0.000329991	0.00471483	0.00471	0.00469	-0.000850391	-0.000863886	-0.000851252	0.00553789	0.00552	0.00553
13.9333	0.000323677	0.000310124	0.000323276	0.00464956	0.00465	0.00462	-0.000858617	-0.000872281	-0.00085871	0.00546379	0.00544	0.00546
13.95	0.000316691	0.00030274	0.000316535	0.00458425	0.00458	0.00456	-0.000866866	-0.000880175	-0.000866136	0.00538919	0.00537	0.00539
13.9667	0.000309682	0.000295745	0.000309762	0.00451928	0.00452	0.00449	-0.000874758	-0.000887482	-0.000873633	0.00531452	0.00529	0.00531
13.9833	0.000302863	0.000289194	0.000302961	0.0044547	0.00445	0.00443	-0.000882173	-0.000894332	-0.000881241	0.00524008	0.00522	0.00524
14	0.000296187	0.000282962	0.000296114	0.0043902	0.00439	0.00437	-0.000889111	-0.000901025	-0.000888915	0.00516555	0.00514	0.00516
14.0167	0.000289464	0.000276792	0.00028923	0.00432557	0.00432	0.0043	-0.000895977	-0.000907921	-0.000896608	0.00509055	0.00507	0.00509
14.0333	0.000282526	0.000270387	0.000282301	0.00426067	0.00426	0.00424	-0.000903225	-0.000915315	-0.000904276	0.00501485	0.005	0.00501
14.05	0.000275517	0.000263526	0.000275337	0.00419539	0.00419	0.00417	-0.000910997	-0.000923326	-0.000911916	0.00493834	0.00492	0.00494
14.0667	0.000268579	0.000256143	0.00026834	0.00412983	0.00413	0.00411	-0.000918984	-0.000931854	-0.000919544	0.00486131	0.00484	0.00486
14.0833	0.000261641	0.000248354	0.000261309	0.00406414	0.00406	0.00404	-0.000926971	-0.000940622	-0.000927192	0.00478399	0.00476	0.00478
14.1	0.000254703	0.000240412	0.000254228	0.00399865	0.004	0.00397	-0.000935006	-0.000949279	-0.000934926	0.0047066	0.00468	0.00471
14.1167	0.000247455	0.000232611	0.000247099	0.0039333	0.00393	0.0039	-0.000942969	-0.000957525	-0.000942763	0.00462925	0.0046	0.00463
14.1333	0.000240088	0.000225178	0.000239927	0.00386797	0.00387	0.00384	-0.000950909	-0.000965224	-0.000950664	0.00455158	0.00452	0.00455
14.15	0.00023272	0.000218188	0.000232723	0.00380253	0.0038	0.00377	-0.000958657	-0.000972446	-0.000958544	0.0044735	0.00445	0.00447
14.1667	0.00022552	0.000211538	0.000225483	0.00373713	0.00374	0.00371	-0.000966311	-0.000979438	-0.000966352	0.00439506	0.00437	0.00439
14.1833	0.000218296	0.00020499	0.000218242	0.00367216	0.00368	0.00365	-0.000974178	-0.000986527	-0.000974087	0.00431623	0.00429	0.00432
14.2	0.000211048	0.000198267	0.000211007	0.00360814	0.00361	0.00359	-0.000982189	-0.000993992	-0.000981769	0.00423763	0.00422	0.00424
14.2167	0.000203633	0.000191164	0.000203837	0.00354487	0.00355	0.00352	-0.000990129	-0.001	-0.000989424	0.00415943	0.00414	0.00416
14.2333	0.000196266	0.000183632	0.000196775	0.0034825	0.00348	0.00346	-0.000997686	-0.00101	-0.000997058	0.00408184	0.00406	0.00408
14.25	0.000188947	0.000175809	0.000189822	0.00342041	0.00342	0.00339	-0.00100486	-0.00102	-0.001	0.00400448	0.00398	0.00401
14.2667	0.000181985	0.000167974	0.000182954	0.00335845	0.00336	0.00333	-0.00101206	-0.00103	-0.00101	0.00392737	0.0039	0.00393
14.2833	0.000175118	0.000160452	0.000176152	0.00329691	0.0033	0.00326	-0.0010195	-0.00104	-0.00102	0.0038506	0.00382	0.00385
14.3	0.000168586	0.000153497	0.000169431	0.00323576	0.00324	0.0032	-0.00102718	-0.00104	-0.00103	0.00377457	0.00375	0.00378
14.3167	0.000162411	0.000147198	0.000162836	0.00317525	0.00318	0.00314	-0.00103488	-0.00105	-0.00104	0.00369954	0.00367	0.0037
14.3333	0.000156236	0.000141447	0.000156401	0.00311547	0.00312	0.00309	-0.00104256	-0.00106	-0.00104	0.00362542	0.0036	0.00363
14.35	0.000149965	0.000135983	0.000150154	0.00305666	0.00306	0.00303	-0.00105023	-0.00106	-0.00105	0.00355213	0.00353	0.00356
14.3667	0.00014348	0.00013049	0.000144102	0.00299875	0.003	0.00297	-0.00105798	-0.00107	-0.00106	0.00347939	0.00346	0.00348
14.3833	0.000137115	0.000124726	0.000138287	0.00294145	0.00295	0.00291	-0.00106587	-0.00108	-0.00107	0.00340717	0.00339	0.00341
14.4	0.000131083	0.000118625	0.000132736	0.00288504	0.00289	0.00286	-0.00107358	-0.00109	-0.00107	0.00333562	0.00331	0.00334
14.4167	0.00012548	0.000112346	0.000127463	0.00282954	0.00283	0.0028	-0.00108085	-0.00109	-0.00108	0.00326488	0.00324	0.00327
14.4333	0.000120235	0.000106235	0.000122521	0.00277492	0.00278	0.00274	-0.00108757	-0.0011	-0.00109	0.00319529	0.00317	0.0032
14.45	0.000115418	0.000100723	0.000117998	0.00272106	0.00273	0.00269	-0.00109408	-0.00111	-0.00109	0.00312691	0.0031	0.00313
14.4667	0.000111151	9.61905e-05	0.000113977	0.00266827	0.00267	0.00263	-0.00110052	-0.00112	-0.0011	0.00305972	0.00303	0.00307
14.4833	0.000107527	9.2838e-05	0.000110488	0.0026167	0.00262	0.00258	-0.00110712	-0.00112	-0.00111	0.00299389	0.00296	0.003
14.5	0.000104404	9.06243e-05	0.000107544	0.00256673	0.00257	0.00254	-0.00111375	-0.00113	-0.00111	0.00292928	0.0029	0.00294
14.5167	0.000101876	8.92771e-05	0.000105123	0.00251843	0.00253	0.00249	-0.00112009	-0.00113	-0.00112	0.00286627	0.00284	0.00288
14.5333	0.000100207	8.8388e-05	0.000103235	0.00247182	0.00248	0.00244	-0.00112598	-0.00114	-0.00112	0.00280485	0.00278	0.00282
14.55	9.92537e-05	8.75552e-05	0.000101883	0.00242645	0.00244	0.0024	-0.00113139	-0.00114	-0.00113	0.00274582	0.00273	0.00276
14.5667	9.87291e-05	8.65227e-05	0.000101037	0.00238241	0.00239	0.00235	-0.00113645	-0.00115	-0.00113	0.00268936	0.00267	0.00271
14.5833	9.87053e-05	8.52734e-05	0.00010066	0.00234002	0.00235	0.00231	-0.00114105	-0.00115	-0.00114	0.00263581	0.00262	0.00265
14.6	9.88483e-05	8.4041e-05	0.000100708	0.00230044	0.00232	0.00227	-0.00114512	-0.00116	-0.00114	0.00258574	0.00256	0.00261
14.6167	9.94682e-05	8.32323e-05	0.000101146	0.00226432	0.00228	0.00223	-0.00114849	-0.00116	-0.00114	0.00254009	0.00252	0.00256
14.6333	0.000100541	8.32938e-05	0.000101976	0.00223218	0.00225	0.0022	-0.00115087	-0.00117	-0.00115	0.00249946	0.00248	0.00253
14.65	0.000101852	8.45688e-05	0.000103305	0.0022046	0.00223	0.00218	-0.00115235	-0.00117	-0.00115	0.00246468	0.00244	0.00249
14.6667	0.000103378	8.71973e-05	0.000105396	0.00218152	0.0022	0.00216	-0.00115306	-0.00117	-0.00115	0.00243604	0.00242	0.00247
14.6833	0.000104928	9.1111e-05	0.000108617	0.0021633	0.00219	0.00214	-0.00115271	-0.00116	-0.00114	0.00241375	0.0024	0.00245
14.7	0.000106692	9.61376e-05	0.000113468	0.0021499	0.00217	0.00213	-0.00115116	-0.00116	-0.00114	0.00239837	0.00239	0.00243
14.7167	0.000109339	0.00010219	0.000120488	0.00214127	0.00216	0.00212	-0.00114741	-0.00115	-0.00113	0.00238998	0.00238	0.00242
14.7333	0.000113869	0.000109495	0.000130302	0.00213717	0.00216	0.00211	-0.00114055	-0.00114	-0.00112	0.00238864	0.00237	0.00242
14.75	0.000121737	0.000118792	0.000143636	0.00213763	0.00216	0.00211	-0.00112948	-0.00113	-0.0011	0.00239379	0.00238	0.00242
14.7667	0.000134134	0.00013141	0.000161308	0.00214227	0.00216	0.00211	-0.00111337	-0.00111	-0.00108	0.00240486	0.00238	0.00243
14.7833	0.000152206	0.000149192	0.000184191	0.00215038	0.00216	0.00211	-0.00109107	-0.00109	-0.00105	0.00242059	0.00239	0.00244
14.8	0.000176692	0.000174237	0.000213138	0.00216097	0.00217	0.00212	-0.0010612	-0.00106	-0.00102	0.00243995	0.00241	0.00245
14.8167	0.000208497	0.000208488	0.000248863	0.00217308	0.00218	0.00213	-0.00102263	-0.00102	-0.000976591	0.0024617	0.00243	0.00247
14.8333	0.000248528	0.000253251	0.000291844	0.00218555	0.00218	0.00214	-0.000974536	-0.000966906	-0.00092555	0.00248432	0.00245	0.00248
14.85	0.000297761	0.000308728	0.000342261	0.00219742	0.00219	0.00215	-0.000916243	-0.00090194	-0.000865886	0.00250642	0.00247	0.0025
14.8667	0.00035665	0.000373688	0.00039998	0.00220796	0.0022	0.00216	-0.000847435	-0.000826314	-0.000797723	0.00252652	0.00248	0.00251
14.8833	0.0004251	0.000445366	0.000464533	0.00221616	0.0022	0.00217	-0.000767875	-0.000742875	-0.000721602	0.00254333	0.0025	0.00252
14.9	0.000502324	0.000519639	0.000535111	0.00222138	0.0022	0.00217	-0.00067811	-0.000655976	-0.000638472	0.00255578	0.00251	0.00253
14.9167	0.000586653	0.000591482	0.000610592	0.00222307	0.0022	0.00217	-0.000579095	-0.000571073	-0.000549611	0.00256321	0.00251	0.00254
14.9333	0.000676322	0.000655637	0.000685581	0.00222081	0.00221	0.00217	-0.000473189	-0.000494065	-0.000461661	0.00256491	0.00251	0.00254
14.95	0.000769043	0.000707399	0.000769782	0.00221423	0.0022	0.00217	-0.000363565	-0.000430474	-0.000362805	0.00256021	0.00251	0.00255
14.9667	0.000862289	0.000743355	0.0008599	0.00220279	0.0022	0.00217	-0.000253749	-0.000384601	-0.000256486	0.00254893	0.00251	0.00254
14.9833	0.000953054	0.000761946	0.000951378	0.00218629	0.00218	0.00217	-0.000146771	-0.000358823	-0.000148559	0.00253136	0.00251	0.00253
15	0.00103879	0.000763736	0.00104	0.00216485	0.00216	0.00217	-4.51565e-05	-0.000353189	-4.51565e-05	0.00250764	0.00251	0.00251

## Sheet: Figure6
	AP-2	AP-1	APG-2	APG-1
Gly	0.21157	0.15062	0.2181	0.15821
Hyp	0.11329	0.14971	0.1082	0.13938
Pro	0.14571	0.11938	0.14706	0.11094
Glu	0.10877	0.09682	0.10585	0.09449
Arg	0.07372	0.08392	0.07372	0.06431
Ala	0.09857	0.07247	0.10156	0.05619
Asp	0.05564	0.07048	0.05158	0.0678
Val	0.03154	0.04568	0.03261	0.03611
Lys	0.02596	0.04229	0.02416	0.04173
Ser	0.03455	0.03899	0.03425	0.0596
Leu	0.02757	0.02096	0.02829	0.01565
His	0.00543	0.02032	0.01094	0.0521
Phe	0.02217	0.01797	0.02254	0.01689
Cys-s	0.00158	0.00749	0.00158	0.00868
Tyr	0.00258	0.01632	0.00195	0.01085
Ile	0.01306	0.01361	0.01315	0.01145
Met	0.00852	0.01339	0.00158	0.02728
Thr	0.01977	0.01958	0.02499	0.02832

## Sheet: Figure7
浓度mg/ml	AP-1吸光度			AP-2吸光度			APG-1吸光度			APG-2吸光度
50	0.104	0.111	0.107	0.108	0.11	0.101	0.101	0.107	0.101	0.103	0.116	0.114
25	0.129	0.132	0.136	0.126	0.12	0.12	0.132	0.135	0.133	0.11	0.128	0.126
12.5	0.153	0.172	0.177	0.156	0.161	0.147	0.147	0.152	0.156	0.125	0.145	0.142
6.25	0.198	0.201	0.197	0.18	0.184	0.18	0.181	0.181	0.172	0.152	0.162	0.162
5	0.221	0.212	0.214	0.208	0.207	0.204	0.196	0.199	0.2	0.17	0.186	0.181
OB	0.301
OC	0.098
浓度mg/ml	AP-1抑制率			AP-2抑制率			APG-1抑制率			APG-2抑制率
50	97.0443	93.5961	95.5665	95.0739	94.0887	98.5222	98.5222	95.5665	98.5222	97.5369	91.133	92.1182
25	84.7291	83.2512	81.2808	86.2069	89.1626	89.1626	83.2512	81.7734	82.7586	94.0887	85.2217	86.2069
12.5	72.9064	63.5468	61.0837	71.4286	68.9655	75.8621	75.8621	73.399	71.4286	86.6995	76.8473	78.3251
6.25	50.7389	49.2611	51.2315	59.6059	57.6355	59.6059	59.1133	59.1133	63.5468	73.399	68.4729	68.4729
5	39.4089	43.8424	42.8571	45.8128	46.3054	47.7833	51.7241	50.2463	49.7537	64.532	56.6502	59.1133

## Sheet: Figure8
吸光度	NC（0）	6.25	12.5	25	50	100	200	PC	纯基培
AP-1	1.087	1.129	1.231	1.365	1.447	1.4	1.305	1.372	0.219
	1.104	1.139	1.232	1.298	1.454	1.51	1.333	1.511	0.228
	1.095	1.142	1.22	1.319	1.409	1.321	1.257	1.373	0.207
AP-2	1.078	1.4	1.511	1.64	1.647	1.506	1.347	1.401	0.239
	1.085	1.515	1.568	1.704	1.684	1.565	1.333	1.369	0.205
	1.108	1.417	1.558	1.715	1.732	1.573	1.396	1.466	0.216
APG-1	1.043	1.135	1.215	1.378	1.406	1.15	0.885	1.366	0.229
	1.105	1.175	1.314	1.478	1.548	1.295	1.065	1.356	0.218
	1.08	1.215	1.296	1.469	1.464	1.29	0.939	1.427	0.237
APG-2	1.063	1.292	1.349	1.38	1.402	1.375	0.986	1.388	0.209
	1.082	1.295	1.392	1.414	1.455	1.318	1.172	1.44	0.225
	1.09	1.283	1.427	1.412	1.406	1.301	1.08	1.405	0.206
增殖率
	NC（0）	6.25	12.5	25	50	100	200	PC
AP-1	100	104.839	116.59	132.028	141.475	136.06	125.115	132.834
	100	103.995	114.612	122.146	139.954	146.347	126.142	146.461
	100	105.293	114.077	125.225	135.36	125.45	118.243	131.306
AP-2	100	138.379	151.609	166.985	167.819	151.013	132.062	138.498
	100	148.864	154.886	170.341	168.068	154.545	128.182	132.273
	100	134.641	150.448	168.049	169.955	152.13	132.287	140.135
APG-1	100	111.302	121.13	141.155	144.595	113.145	80.5897	139.681
	100	107.892	123.563	142.052	149.944	121.421	95.4904	128.298
	100	116.014	125.623	146.145	145.552	124.911	83.274	141.163
APG-2	100	126.815	133.489	137.119	139.696	136.534	90.9836	138.056
	100	124.854	136.173	138.74	143.524	127.538	110.502	141.774
	100	121.833	138.122	136.425	135.747	123.869	98.8688	135.633
